# Supplementary material for: Synthesis of 5-Metalla-Spiro[4.5]Heterodecenes by [1,4]-Cycloaddition Reaction of Group 13 Diyls with 1,2-Diketones
Source: MDPI journal article supplement (doi:10.3390/chemistry5020064), 2023-04-20

```
R(reflections)= 0.0210( 18961)      wR2(reflections)=
S = 1.049                          0.0512( 19997)
Npar= 471
```

---

The following ALERTS were generated. Each ALERT has the format  
**test-name\_ALERT\_alert-type\_alert-level.**

Click on the hyperlinks for more details of the test.

---

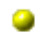

#### Alert level C

|                   |                                                  |      |        |
|-------------------|--------------------------------------------------|------|--------|
| PLAT094_ALERT_2_C | Ratio of Maximum / Minimum Residual Density .... | 2.19 | Report |
| PLAT220_ALERT_2_C | NonSolvent Resd 1 C Ueq(max)/Ueq(min) Range      | 3.9  | Ratio  |
| PLAT222_ALERT_3_C | NonSolvent Resd 1 H Uiso(max)/Uiso(min) Range    | 4.5  | Ratio  |

---

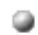

#### Alert level G

|                   |                                                  |     |      |
|-------------------|--------------------------------------------------|-----|------|
| PLAT232_ALERT_2_G | Hirshfeld Test Diff (M-X) In1 --N3 .             | 8.4 | s.u. |
| PLAT802_ALERT_4_G | CIF Input Record(s) with more than 80 Characters | 1   | Info |
| PLAT910_ALERT_3_G | Missing # of FCF Reflection(s) Below Theta(Min). | 4   | Note |
| PLAT912_ALERT_4_G | Missing # of FCF Reflections Above STh/L= 0.600  | 7   | Note |
| PLAT933_ALERT_2_G | Number of HKL-OMIT Records in Embedded .res File | 3   | Note |
| PLAT978_ALERT_2_G | Number C-C Bonds with Positive Residual Density. | 17  | Info |

---

0 **ALERT level A** = Most likely a serious problem - resolve or explain  
0 **ALERT level B** = A potentially serious problem, consider carefully  
3 **ALERT level C** = Check. Ensure it is not caused by an omission or oversight  
6 **ALERT level G** = General information/check it is not something unexpected

0 ALERT type 1 CIF construction/syntax error, inconsistent or missing data  
5 ALERT type 2 Indicator that the structure model may be wrong or deficient  
2 ALERT type 3 Indicator that the structure quality may be low  
2 ALERT type 4 Improvement, methodology, query or suggestion  
0 ALERT type 5 Informative message, check

---

## Datablock: mw\_175\_6m

---

Bond precision: C-C = 0.0034 A

Wavelength=0.71073

|       |             |                |             |
|-------|-------------|----------------|-------------|
| Cell: | a=16.620(5) | b=18.867(6)    | c=19.008(6) |
|       | alpha=90    | beta=99.398(5) | gamma=90    |

Temperature: 100 K

|                        | Calculated                     | Reported            |
|------------------------|--------------------------------|---------------------|
| Volume                 | 5880 (3)                       | 5880 (3)            |
| Space group            | P 21/c                         | P 21/c              |
| Hall group             | -P 2ybc                        | -P 2ybc             |
| Moiety formula         | C114 H122 Al2 N4 O8, 4 (C7 H8) | ?                   |
| Sum formula            | C142 H154 Al2 N4 O8            | C142 H154 Al2 N4 O8 |
| Mr                     | 2098.65                        | 2098.64             |
| Dx, g cm <sup>-3</sup> | 1.185                          | 1.185               |
| Z                      | 2                              | 2                   |
| Mu (mm <sup>-1</sup> ) | 0.086                          | 0.086               |
| F000                   | 2248.0                         | 2248.0              |
| F000'                  | 2249.09                        |                     |
| h, k, lmax             | 22, 25, 25                     | 22, 25, 25          |
| Nref                   | 14720                          | 14551               |
| Tmin, Tmax             | 0.982, 0.986                   | 0.630, 0.750        |
| Tmin'                  | 0.982                          |                     |

Correction method= # Reported T Limits: Tmin=0.630 Tmax=0.750  
AbsCorr = MULTI-SCAN

Data completeness= 0.989

Theta(max)= 28.368

R(reflections)= 0.0689 ( 9783)

wR2(reflections)=  
0.1546 ( 14551)

S = 1.126

Npar= 719

The following ALERTS were generated. Each ALERT has the format

**test-name\_ALERT\_alert-type\_alert-level.**

Click on the hyperlinks for more details of the test.

### Alert level C

|                                                                    |              |
|--------------------------------------------------------------------|--------------|
| PLAT906_ALERT_3_C Large K Value in the Analysis of Variance .....  | 10.902 Check |
| PLAT906_ALERT_3_C Large K Value in the Analysis of Variance .....  | 2.034 Check  |
| PLAT910_ALERT_3_C Missing # of FCF Reflection(s) Below Theta(Min). | 5 Note       |

### Alert level G

|                                                                    |            |
|--------------------------------------------------------------------|------------|
| PLAT083_ALERT_2_G SHELXL Second Parameter in WGHT Unusually Large  | 5.80 Why ? |
| PLAT232_ALERT_2_G Hirshfeld Test Diff (M-X) All --O3 .             | 5.6 s.u.   |
| PLAT720_ALERT_4_G Number of Unusual/Non-Standard Labels .....      | 30 Note    |
| PLAT793_ALERT_4_G Model has Chirality at C30 (Centro SPGR)         | S Verify   |
| PLAT793_ALERT_4_G Model has Chirality at C31 (Centro SPGR)         | S Verify   |
| PLAT794_ALERT_5_G Tentative Bond Valency for Al1 (III) .           | 2.84 Info  |
| PLAT802_ALERT_4_G CIF Input Record(s) with more than 80 Characters | 1 Info     |
| PLAT912_ALERT_4_G Missing # of FCF Reflections Above STh/L= 0.600  | 165 Note   |
| PLAT933_ALERT_2_G Number of HKL-OMIT Records in Embedded .res File | 2 Note     |

---

0 **ALERT level A** = Most likely a serious problem - resolve or explain  
 0 **ALERT level B** = A potentially serious problem, consider carefully  
 3 **ALERT level C** = Check. Ensure it is not caused by an omission or oversight  
 10 **ALERT level G** = General information/check it is not something unexpected

0 ALERT type 1 CIF construction/syntax error, inconsistent or missing data  
 4 ALERT type 2 Indicator that the structure model may be wrong or deficient  
 3 ALERT type 3 Indicator that the structure quality may be low  
 5 ALERT type 4 Improvement, methodology, query or suggestion  
 1 ALERT type 5 Informative message, check

---

## Datablock: mw\_175\_1m

---

Bond precision: C-C = 0.0018 Å

Wavelength=1.54178

Cell: a=12.3771(5) b=12.9748(5) c=24.5551(10)  
 alpha=97.796(2) beta=96.978(2) gamma=106.7538(19)  
 Temperature: 100 K

|                        | Calculated                    | Reported           |
|------------------------|-------------------------------|--------------------|
| Volume                 | 3687.0(3)                     | 3687.0(3)          |
| Space group            | P -1                          | P -1               |
| Hall group             | -P 1                          | -P 1               |
| Moiety formula         | C72 H92 Al2 N4 O2, 2(C6 H6) ? |                    |
| Sum formula            | C84 H104 Al2 N4 O2            | C84 H104 Al2 N4 O2 |
| Mr                     | 1255.68                       | 1255.67            |
| Dx, g cm <sup>-3</sup> | 1.131                         | 1.131              |
| Z                      | 2                             | 2                  |
| Mu (mm <sup>-1</sup> ) | 0.725                         | 0.725              |
| F000                   | 1356.0                        | 1356.0             |
| F000'                  | 1360.13                       |                    |
| h, k, lmax             | 15, 16, 31                    | 15, 16, 31         |
| Nref                   | 16176                         | 15992              |
| Tmin, Tmax             | 0.845, 0.957                  | 0.680, 0.750       |
| Tmin'                  | 0.845                         |                    |

Correction method= # Reported T Limits: Tmin=0.680 Tmax=0.750  
 AbsCorr = MULTI-SCAN

Data completeness= 0.989

Theta(max)= 80.424

R(reflections)= 0.0342( 13579)

wR2(reflections)=  
0.0889( 15992)

S = 1.028

Npar= 904

The following ALERTS were generated. Each ALERT has the format

**test-name\_ALERT\_alert-type\_alert-level.**

Click on the hyperlinks for more details of the test.

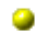

### Alert level C

|                   |                                             |        |   |                           |     |        |
|-------------------|---------------------------------------------|--------|---|---------------------------|-----|--------|
| PLAT220_ALERT_2_C | NonSolvent                                  | Resd 1 | C | Ueq(max)/Ueq(min) Range   | 4.5 | Ratio  |
| PLAT222_ALERT_3_C | NonSolvent                                  | Resd 1 | H | Uiso(max)/Uiso(min) Range | 4.7 | Ratio  |
| PLAT250_ALERT_2_C | Large U3/U1 Ratio for Average U(i,j) Tensor | ....   |   |                           | 2.2 | Note   |
| PLAT250_ALERT_2_C | Large U3/U1 Ratio for Average U(i,j) Tensor | ....   |   |                           | 3.2 | Note   |
| PLAT250_ALERT_2_C | Large U3/U1 Ratio for Average U(i,j) Tensor | ....   |   |                           | 2.1 | Note   |
| PLAT911_ALERT_3_C | Missing FCF Refl Between Thmin & STh/L=     | 0.600  |   |                           | 5   | Report |

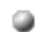

### Alert level G

|                   |                                                  |           |  |  |      |        |
|-------------------|--------------------------------------------------|-----------|--|--|------|--------|
| PLAT187_ALERT_4_G | The CIF-Embedded .res File Contains RIGU Records |           |  |  | 1    | Report |
| PLAT302_ALERT_4_G | Anion/Solvent/Minor-Residue Disorder (Resd 3 )   |           |  |  | 100% | Note   |
| PLAT302_ALERT_4_G | Anion/Solvent/Minor-Residue Disorder (Resd 4 )   |           |  |  | 100% | Note   |
| PLAT304_ALERT_4_G | Non-Integer Number of Atoms in .....             | (Resd 3 ) |  |  | 6.41 | Check  |
| PLAT304_ALERT_4_G | Non-Integer Number of Atoms in .....             | (Resd 4 ) |  |  | 5.59 | Check  |
| PLAT720_ALERT_4_G | Number of Unusual/Non-Standard Labels .....      |           |  |  | 36   | Note   |
| PLAT802_ALERT_4_G | CIF Input Record(s) with more than 80 Characters |           |  |  | 1    | Info   |
| PLAT860_ALERT_3_G | Number of Least-Squares Restraints .....         |           |  |  | 108  | Note   |
| PLAT910_ALERT_3_G | Missing # of FCF Reflection(s) Below Theta(Min). |           |  |  | 1    | Note   |
| PLAT912_ALERT_4_G | Missing # of FCF Reflections Above STh/L=        | 0.600     |  |  | 178  | Note   |
| PLAT978_ALERT_2_G | Number C-C Bonds with Positive Residual Density. |           |  |  | 16   | Info   |

- 0 **ALERT level A** = Most likely a serious problem - resolve or explain  
0 **ALERT level B** = A potentially serious problem, consider carefully  
6 **ALERT level C** = Check. Ensure it is not caused by an omission or oversight  
11 **ALERT level G** = General information/check it is not something unexpected

- 0 ALERT type 1 CIF construction/syntax error, inconsistent or missing data  
5 ALERT type 2 Indicator that the structure model may be wrong or deficient  
4 ALERT type 3 Indicator that the structure quality may be low  
8 ALERT type 4 Improvement, methodology, query or suggestion  
0 ALERT type 5 Informative message, check

## Datablock: mw\_175filfilm

Bond precision: C-C = 0.0024 A

Wavelength=0.71073

Cell: a=12.902(2) b=23.139(4) c=25.361(4)  
alpha=95.653(9) beta=104.445(8) gamma=91.410(8)

Temperature: 100 K

|                        | Calculated                      | Reported           |
|------------------------|---------------------------------|--------------------|
| Volume                 | 7287(2)                         | 7287(2)            |
| Space group            | P -1                            | P -1               |
| Hall group             | -P 1                            | -P 1               |
| Moiety formula         | 2(C72 H92 Al2 N4 O2), 3(C6 H14) | ?                  |
| Sum formula            | C162 H226 Al4 N8 O4             | C81 H113 Al2 N4 O2 |
| Mr                     | 2457.44                         | 1228.71            |
| Dx, g cm <sup>-3</sup> | 1.120                           | 1.120              |
| Z                      | 2                               | 4                  |
| Mu (mm <sup>-1</sup> ) | 0.088                           | 0.088              |
| F000                   | 2676.0                          | 2676.0             |
| F000'                  | 2677.34                         |                    |
| h, k, lmax             | 18, 33, 36                      | 18, 33, 36         |
| Nref                   | 44512                           | 44487              |
| Tmin, Tmax             | 0.965, 0.985                    | 0.680, 0.750       |
| Tmin'                  | 0.965                           |                    |

Correction method= # Reported T Limits: Tmin=0.680 Tmax=0.750  
AbsCorr = MULTI-SCAN

Data completeness= 0.999                      Theta(max)= 30.508

R(reflections)= 0.0531( 29407)                      wR2(reflections)=  
S = 1.006                      Npar= 1677                      0.1385( 44487)

The following ALERTS were generated. Each ALERT has the format  
**test-name\_ALERT\_alert-type\_alert-level.**  
Click on the hyperlinks for more details of the test.

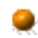

#### Alert level B

PLAT250\_ALERT\_2\_B Large U3/U1 Ratio for Average U(i,j) Tensor ....

5.2 Note

**Author Response: Diffuse disorder of a solvent molecule that cannot be resolved any further.**

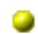

#### Alert level C

|                                                                    |           |   |                                 |       |       |              |
|--------------------------------------------------------------------|-----------|---|---------------------------------|-------|-------|--------------|
| PLAT220_ALERT_2_C NonSolvent                                       | Resd 1    | C | Ueq(max)/Ueq(min)               | Range | 4.8   | Ratio        |
| PLAT220_ALERT_2_C NonSolvent                                       | Resd 2    | C | Ueq(max)/Ueq(min)               | Range | 5.0   | Ratio        |
| PLAT222_ALERT_3_C NonSolvent                                       | Resd 1    | H | Uiso(max)/Uiso(min)             | Range | 4.8   | Ratio        |
| PLAT222_ALERT_3_C NonSolvent                                       | Resd 2    | H | Uiso(max)/Uiso(min)             | Range | 4.7   | Ratio        |
| PLAT242_ALERT_2_C Low                                              | 'MainMol' |   | Ueq as Compared to Neighbors of |       | C44_1 | Check        |
| PLAT260_ALERT_2_C Large Average Ueq of Residue Including           |           |   |                                 | C1_6  | 0.103 | Check        |
| PLAT767_ALERT_4_C INS Embedded LIST 6 Instruction Should be LIST 4 |           |   |                                 |       |       | Please Check |

### ● Alert level G

|                   |                                                  |       |        |
|-------------------|--------------------------------------------------|-------|--------|
| PLAT002_ALERT_2_G | Number of Distance or Angle Restraints on AtSite | 21    | Note   |
| PLAT003_ALERT_2_G | Number of Uiso or Uij Restrained non-H Atoms ... | 6     | Report |
| PLAT045_ALERT_1_G | Calculated and Reported Z Differ by a Factor ... | 0.500 | Check  |
| PLAT176_ALERT_4_G | The CIF-Embedded .res File Contains SADI Records | 2     | Report |
| PLAT178_ALERT_4_G | The CIF-Embedded .res File Contains SIMU Records | 1     | Report |
| PLAT187_ALERT_4_G | The CIF-Embedded .res File Contains RIGU Records | 1     | Report |
| PLAT300_ALERT_4_G | Atom Site Occupancy of C1_6 Constrained at       | 0.5   | Check  |
| PLAT300_ALERT_4_G | Atom Site Occupancy of C5_6 Constrained at       | 0.5   | Check  |
| PLAT300_ALERT_4_G | Atom Site Occupancy of C2_6 Constrained at       | 0.5   | Check  |
| PLAT300_ALERT_4_G | Atom Site Occupancy of C3_6 Constrained at       | 0.5   | Check  |
| PLAT300_ALERT_4_G | Atom Site Occupancy of C4_6 Constrained at       | 0.5   | Check  |
| PLAT300_ALERT_4_G | Atom Site Occupancy of C6_6 Constrained at       | 0.5   | Check  |
| PLAT300_ALERT_4_G | Atom Site Occupancy of H1A_6 Constrained at      | 0.5   | Check  |
| PLAT300_ALERT_4_G | Atom Site Occupancy of H1B_6 Constrained at      | 0.5   | Check  |
| PLAT300_ALERT_4_G | Atom Site Occupancy of H1C_6 Constrained at      | 0.5   | Check  |
| PLAT300_ALERT_4_G | Atom Site Occupancy of H5A_6 Constrained at      | 0.5   | Check  |
| PLAT300_ALERT_4_G | Atom Site Occupancy of H5AB_6 Constrained at     | 0.5   | Check  |
| PLAT300_ALERT_4_G | Atom Site Occupancy of H2A_6 Constrained at      | 0.5   | Check  |
| PLAT300_ALERT_4_G | Atom Site Occupancy of H2AB_6 Constrained at     | 0.5   | Check  |
| PLAT300_ALERT_4_G | Atom Site Occupancy of H3A_6 Constrained at      | 0.5   | Check  |
| PLAT300_ALERT_4_G | Atom Site Occupancy of H3AB_6 Constrained at     | 0.5   | Check  |
| PLAT300_ALERT_4_G | Atom Site Occupancy of H4A_6 Constrained at      | 0.5   | Check  |
| PLAT300_ALERT_4_G | Atom Site Occupancy of H4AB_6 Constrained at     | 0.5   | Check  |
| PLAT300_ALERT_4_G | Atom Site Occupancy of H6A_6 Constrained at      | 0.5   | Check  |
| PLAT300_ALERT_4_G | Atom Site Occupancy of H6B_6 Constrained at      | 0.5   | Check  |
| PLAT300_ALERT_4_G | Atom Site Occupancy of H6C_6 Constrained at      | 0.5   | Check  |
| PLAT302_ALERT_4_G | Anion/Solvent/Minor-Residue Disorder (Resd 6 )   | 100%  | Note   |
| PLAT720_ALERT_4_G | Number of Unusual/Non-Standard Labels .....      | 414   | Note   |
| PLAT789_ALERT_4_G | Atoms with Negative _atom_site_disorder_group #  | 20    | Check  |
| PLAT802_ALERT_4_G | CIF Input Record(s) with more than 80 Characters | 1     | Info   |
| PLAT860_ALERT_3_G | Number of Least-Squares Restraints .....         | 334   | Note   |
| PLAT910_ALERT_3_G | Missing # of FCF Reflection(s) Below Theta(Min). | 1     | Note   |
| PLAT933_ALERT_2_G | Number of HKL-OMIT Records in Embedded .res File | 1     | Note   |
| PLAT978_ALERT_2_G | Number C-C Bonds with Positive Residual Density. | 9     | Info   |
| PLAT992_ALERT_5_G | Repd & Actual _reflns_number_gt Values Differ by | 2     | Check  |

- 0 **ALERT level A** = Most likely a serious problem - resolve or explain  
 1 **ALERT level B** = A potentially serious problem, consider carefully  
 8 **ALERT level C** = Check. Ensure it is not caused by an omission or oversight  
 35 **ALERT level G** = General information/check it is not something unexpected

- 1 ALERT type 1 CIF construction/syntax error, inconsistent or missing data  
 9 ALERT type 2 Indicator that the structure model may be wrong or deficient  
 5 ALERT type 3 Indicator that the structure quality may be low  
 28 ALERT type 4 Improvement, methodology, query or suggestion  
 1 ALERT type 5 Informative message, check

Bond precision: C-C = 0.0016 A

Wavelength=1.54178

Cell: a=9.5575(5) b=9.9812(5) c=15.3139(7)  
alpha=98.5868(15) beta=91.1274(14) gamma=106.0286(13)  
Temperature: 100 K

|                        | Calculated          | Reported            |
|------------------------|---------------------|---------------------|
| Volume                 | 1385.49(12)         | 1385.49(12)         |
| Space group            | P -1                | P -1                |
| Hall group             | -P 1                | -P 1                |
| Moiety formula         | C31 H17 B F10 N2 O2 | ?                   |
| Sum formula            | C31 H17 B F10 N2 O2 | C31 H17 B F10 N2 O2 |
| Mr                     | 650.28              | 650.27              |
| Dx, g cm <sup>-3</sup> | 1.559               | 1.559               |
| Z                      | 2                   | 2                   |
| Mu (mm <sup>-1</sup> ) | 1.266               | 1.266               |
| F000                   | 656.0               | 656.0               |
| F000'                  | 658.83              |                     |
| h, k, lmax             | 12, 12, 19          | 12, 12, 19          |
| Nref                   | 6051                | 6000                |
| Tmin, Tmax             | 0.817, 0.901        | 0.640, 0.750        |
| Tmin'                  | 0.626               |                     |

Correction method= # Reported T Limits: Tmin=0.640 Tmax=0.750  
AbsCorr = MULTISCAN

Data completeness= 0.992

Theta(max)= 80.165

R(reflections)= 0.0310( 5746)

wR2(reflections)=  
0.0824( 6000)

S = 1.040

Npar= 417

The following ALERTS were generated. Each ALERT has the format

**test-name\_ALERT\_alert-type\_alert-level.**

Click on the hyperlinks for more details of the test.

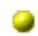

#### Alert level C

|                                                                    |           |
|--------------------------------------------------------------------|-----------|
| PLAT601_ALERT_2_C Unit Cell Contains Solvent Accessible VOIDS of . | 32 Ang**3 |
| PLAT911_ALERT_3_C Missing FCF Refl Between Thmin & STh/L= 0.600    | 3 Report  |
| PLAT934_ALERT_3_C Number of (Iobs-Icalc)/Sigma(W) > 10 Outliers .. | 1 Check   |

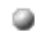

#### Alert level G

|                                                                    |              |
|--------------------------------------------------------------------|--------------|
| PLAT380_ALERT_4_G Incorrectly? Oriented X(sp2)-Methyl Moiety ..... | C5 Check     |
| PLAT395_ALERT_2_G Deviating X-O-Y Angle From 120 for O1 .          | 106.8 Degree |
| PLAT395_ALERT_2_G Deviating X-O-Y Angle From 120 for O2 .          | 107.1 Degree |

|                                                                    |       |             |   |             |
|--------------------------------------------------------------------|-------|-------------|---|-------------|
| PLAT432_ALERT_2_G Short Inter X...Y Contact                        | F5    | ..C1        | . | 2.91 Ang.   |
|                                                                    |       | 1-x,-y,-z = |   | 2_655 Check |
| PLAT434_ALERT_2_G Short Inter HL..HL Contact                       | F5    | ..F5        | . | 2.82 Ang.   |
|                                                                    |       | 1-x,-y,-z = |   | 2_655 Check |
| PLAT802_ALERT_4_G CIF Input Record(s) with more than 80 Characters |       |             |   | 1 Info      |
| PLAT912_ALERT_4_G Missing # of FCF Reflections Above STh/L=        | 0.600 |             |   | 48 Note     |
| PLAT978_ALERT_2_G Number C-C Bonds with Positive Residual Density. |       |             |   | 17 Info     |

---

0 **ALERT level A** = Most likely a serious problem - resolve or explain  
0 **ALERT level B** = A potentially serious problem, consider carefully  
3 **ALERT level C** = Check. Ensure it is not caused by an omission or oversight  
8 **ALERT level G** = General information/check it is not something unexpected

0 ALERT type 1 CIF construction/syntax error, inconsistent or missing data  
6 ALERT type 2 Indicator that the structure model may be wrong or deficient  
2 ALERT type 3 Indicator that the structure quality may be low  
3 ALERT type 4 Improvement, methodology, query or suggestion  
0 ALERT type 5 Informative message, check

---

It is advisable to attempt to resolve as many as possible of the alerts in all categories. Often the minor alerts point to easily fixed oversights, errors and omissions in your CIF or refinement strategy, so attention to these fine details can be worthwhile. In order to resolve some of the more serious problems it may be necessary to carry out additional measurements or structure refinements. However, the purpose of your study may justify the reported deviations and the more serious of these should normally be commented upon in the discussion or experimental section of a paper or in the "special\_details" fields of the CIF. checkCIF was carefully designed to identify outliers and unusual parameters, but every test has its limitations and alerts that are not important in a particular case may appear. Conversely, the absence of alerts does not guarantee there are no aspects of the results needing attention. It is up to the individual to critically assess their own results and, if necessary, seek expert advice.

### Publication of your CIF in IUCr journals

A basic structural check has been run on your CIF. These basic checks will be run on all CIFs submitted for publication in IUCr journals (*Acta Crystallographica*, *Journal of Applied Crystallography*, *Journal of Synchrotron Radiation*); however, if you intend to submit to *Acta Crystallographica Section C* or *E* or *IUCrData*, you should make sure that full publication checks are run on the final version of your CIF prior to submission.

### Publication of your CIF in other journals

Please refer to the *Notes for Authors* of the relevant journal for any special instructions relating to CIF submission.

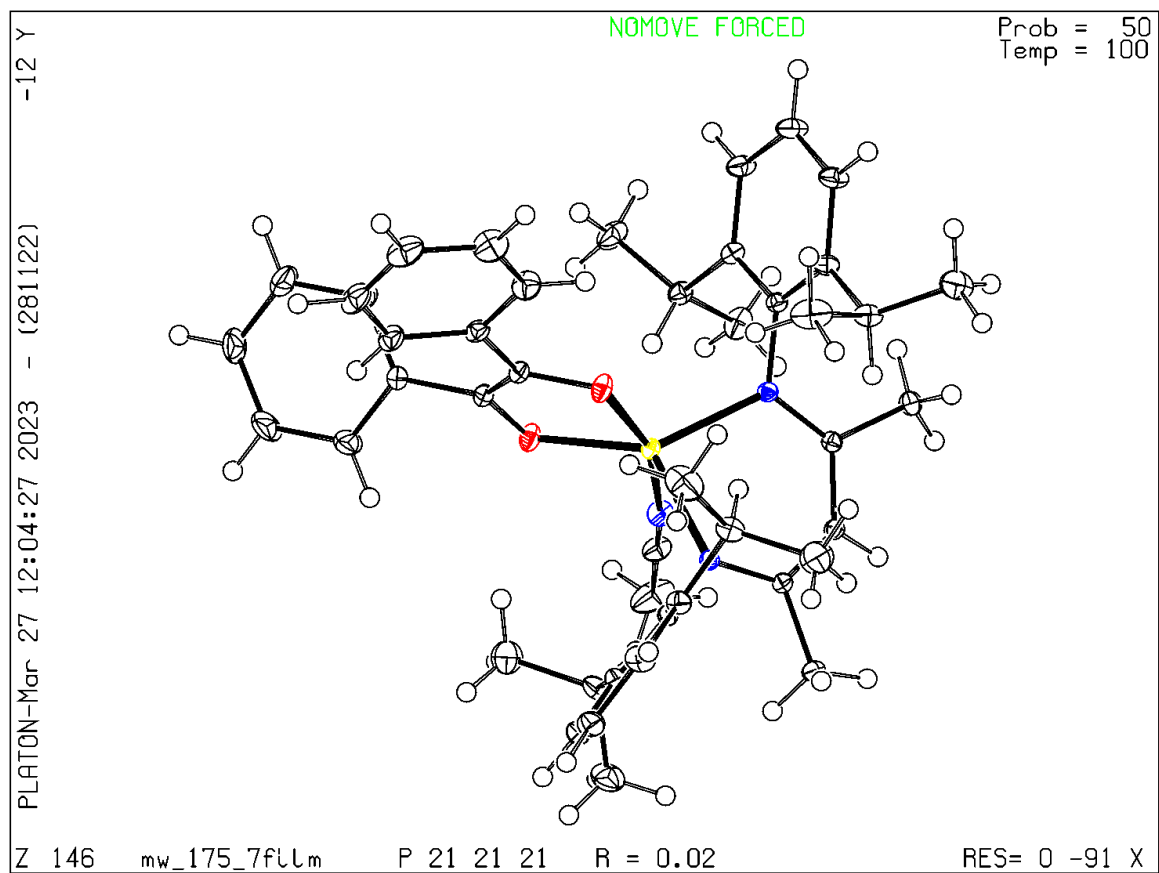

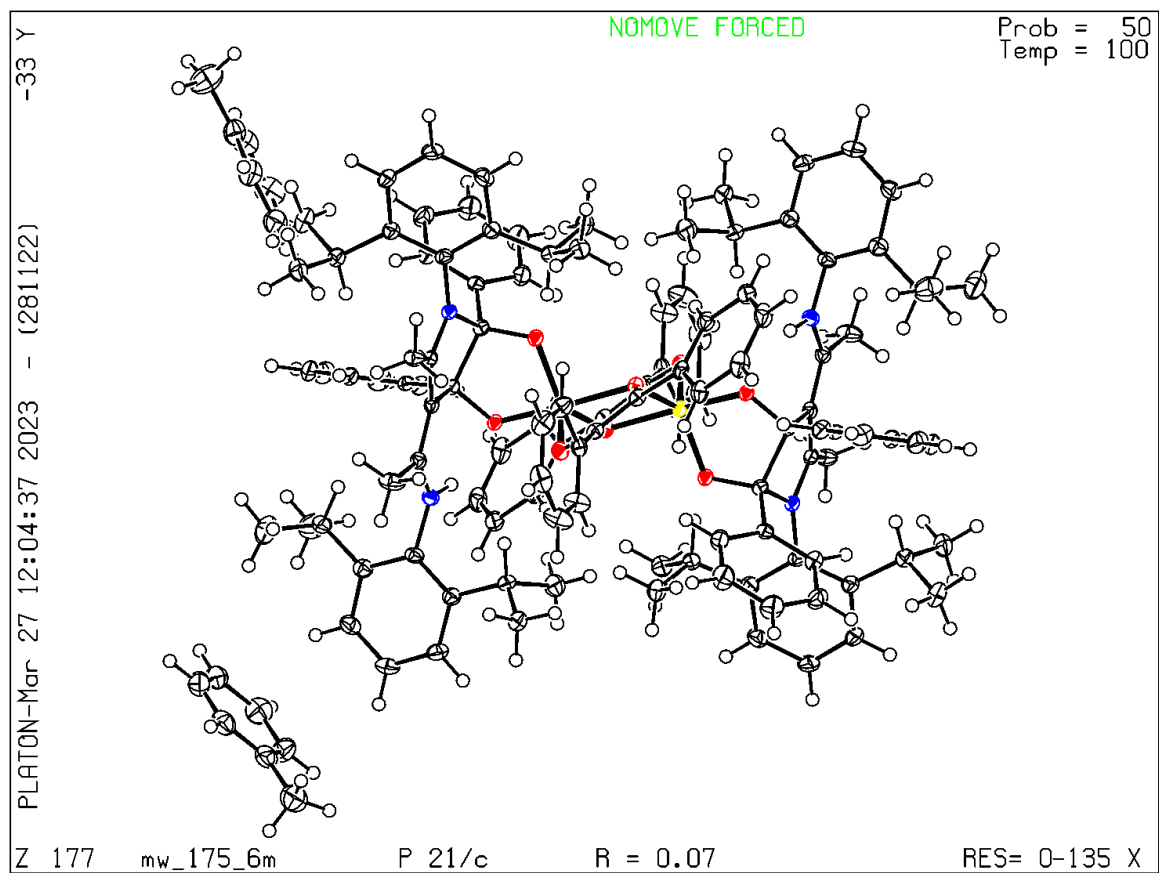

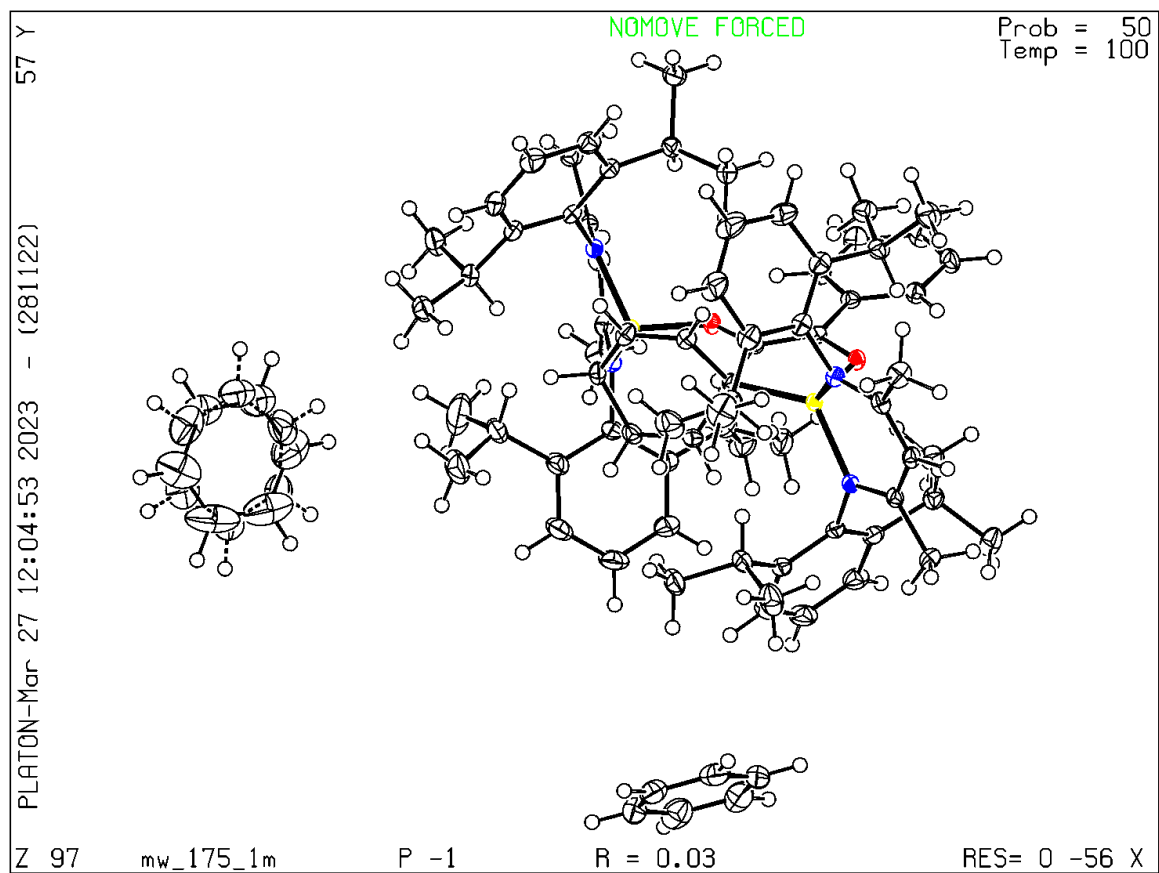

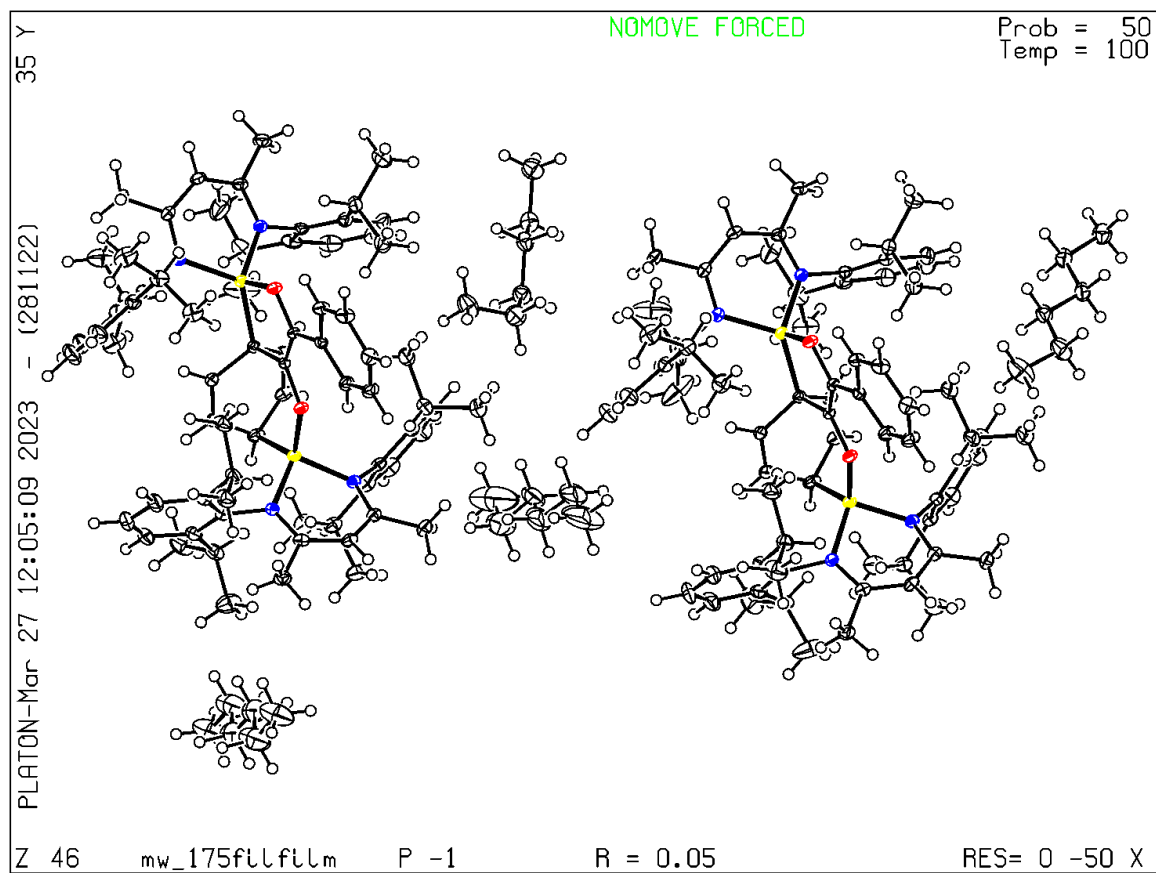

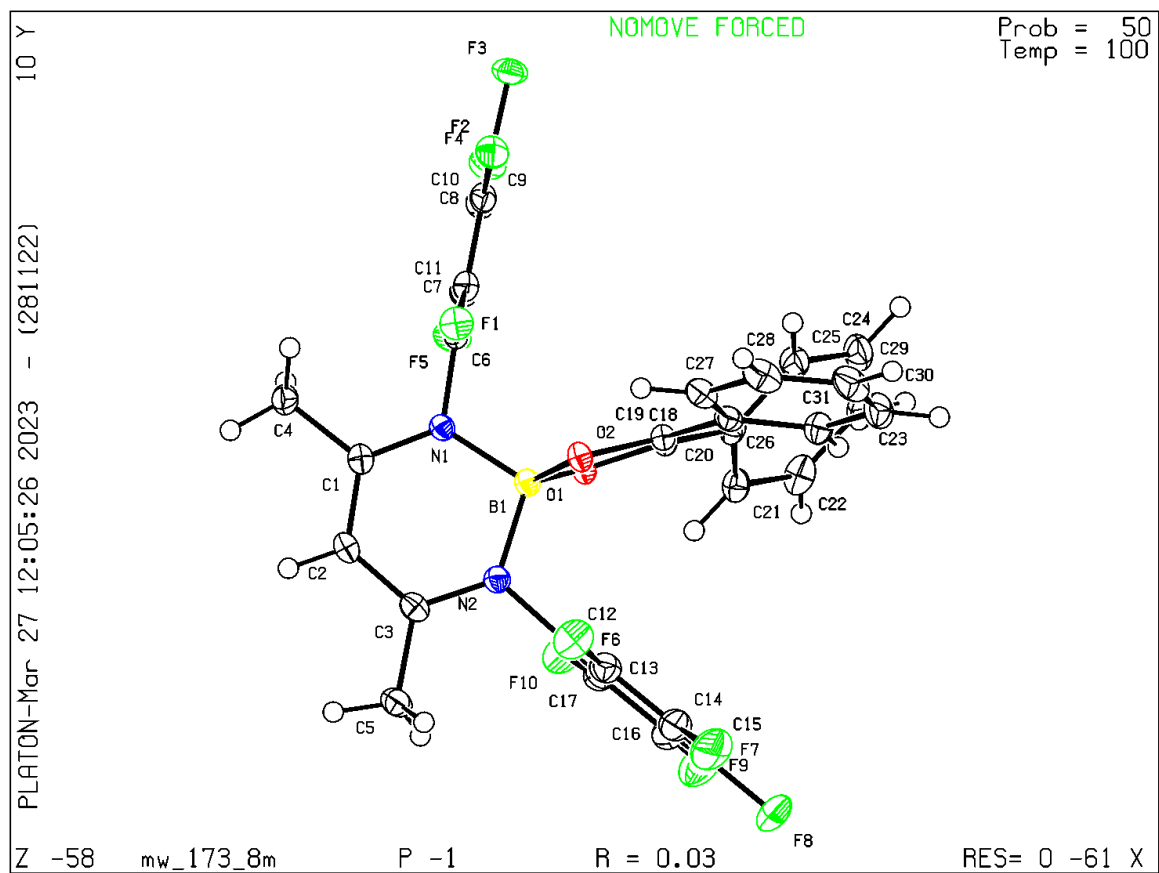

Supplement: s1 [file s1]
