# Supplementary material for: Synthesis of 5-Metalla-Spiro[4.5]Heterodecenes by [1,4]-Cycloaddition Reaction of Group 13 Diyls with 1,2-Diketones
Source: MDPI journal article supplement (doi:10.3390/chemistry5020064), 2023-04-20

## checkCIF/PLATON report

Structure factors have been supplied for datablock(s) mw\_165\_11\_methfam\_sq, mw\_1751filfil\_gelbm, mw\_175\_2m, mw\_176\_1am\_sq

THIS REPORT IS FOR GUIDANCE ONLY. IF USED AS PART OF A REVIEW PROCEDURE FOR PUBLICATION, IT SHOULD NOT REPLACE THE EXPERTISE OF AN EXPERIENCED CRYSTALLOGRAPHIC REFEREE.

No syntax errors found.      CIF dictionary      Interpreting this report

### Datablock: mw\_165\_11\_methfam\_sq

---

|                 |                                  |                                |
|-----------------|----------------------------------|--------------------------------|
| Bond precision: | C-C = 0.0021 A                   | Wavelength=1.54178             |
| Cell:           | a=13.2394(4)                     | b=17.9680(6)      c=16.9249(5) |
|                 | alpha=90                         | beta=92.4650(13)      gamma=90 |
| Temperature:    | 100 K                            |                                |
|                 | Calculated                       | Reported                       |
| Volume          | 4022.5(2)                        | 4022.5(2)                      |
| Space group     | P 21/n                           | P 21/n                         |
| Hall group      | -P 2yn                           | -P 2yn                         |
| Moiety formula  | C82 H94 In2 N4 O4 [+<br>solvent] | ?                              |
| Sum formula     | C82 H94 In2 N4 O4 [+<br>solvent] | C87 H104 In2 N4 O5             |
| Mr              | 1429.25                          | 1515.38                        |
| Dx, g cm-3      | 1.180                            | 1.251                          |
| Z               | 2                                | 2                              |
| Mu (mm-1)       | 4.939                            | 4.977                          |
| F000            | 1488.0                           | 1584.0                         |
| F000'           | 1491.90                          |                                |
| h, k, lmax      | 16, 22, 21                       | 16, 22, 21                     |
| Nref            | 8813                             | 8784                           |
| Tmin, Tmax      | 0.467, 0.668                     | 0.620, 0.750                   |
| Tmin'           | 0.345                            |                                |

Correction method= # Reported T Limits: Tmin=0.620 Tmax=0.750  
AbsCorr = MULTII-SCAN

Data completeness= 0.997      Theta(max)= 80.384

R(reflections)= 0.0198( 7808)

wR2(reflections)=  
0.0504( 8784)

S = 1.029

Npar= 425

The following ALERTS were generated. Each ALERT has the format

**test-name\_ALERT\_alert-type\_alert-level.**

Click on the hyperlinks for more details of the test.

## Alert level G

FORMU01\_ALERT\_2\_G There is a discrepancy between the atom counts in the  
\_chemical\_formula\_sum and the formula from the \_atom\_site\* data.

Atom count from \_chemical\_formula\_sum: C87 H104 In2 N4 O5

Atom count from the \_atom\_site data: C82 H94 In2 N4 O4

CELLZ01\_ALERT\_1\_G Difference between formula and atom\_site contents detected.

CELLZ01\_ALERT\_1\_G ALERT: Large difference may be due to a

symmetry error - see SYMMG tests

From the CIF: \_cell\_formula\_units\_Z 2

From the CIF: \_chemical\_formula\_sum C87 H104 In2 N4 O5

TEST: Compare cell contents of formula and atom\_site data

| atom | Z*formula | cif sites | diff  |
|------|-----------|-----------|-------|
| C    | 174.00    | 164.00    | 10.00 |
| H    | 208.00    | 188.00    | 20.00 |
| In   | 4.00      | 4.00      | 0.00  |
| N    | 8.00      | 8.00      | 0.00  |
| O    | 10.00     | 8.00      | 2.00  |

|                   |                                                  |                |              |
|-------------------|--------------------------------------------------|----------------|--------------|
| PLAT041_ALERT_1_G | Calc. and Reported SumFormula                    | Strings Differ | Please Check |
| PLAT051_ALERT_1_G | Mu(calc) and Mu(CIF) Ratio Differs from 1.0 by . |                | 0.76 %       |
| PLAT176_ALERT_4_G | The CIF-Embedded .res File Contains SADI Records |                | 5 Report     |
| PLAT187_ALERT_4_G | The CIF-Embedded .res File Contains RIGU Records |                | 1 Report     |
| PLAT606_ALERT_4_G | Solvent Accessible VOID(S) in Structure .....    |                | ! Info       |
| PLAT802_ALERT_4_G | CIF Input Record(s) with more than 80 Characters |                | 1 Info       |
| PLAT869_ALERT_4_G | ALERTS Related to the Use of SQUEEZE Suppressed  |                | ! Info       |
| PLAT912_ALERT_4_G | Missing # of FCF Reflections Above STh/L= 0.600  |                | 29 Note      |
| PLAT978_ALERT_2_G | Number C-C Bonds with Positive Residual Density. |                | 15 Info      |

- 0 **ALERT level A** = Most likely a serious problem - resolve or explain  
0 **ALERT level B** = A potentially serious problem, consider carefully  
0 **ALERT level C** = Check. Ensure it is not caused by an omission or oversight  
12 **ALERT level G** = General information/check it is not something unexpected

- 4 ALERT type 1 CIF construction/syntax error, inconsistent or missing data  
2 ALERT type 2 Indicator that the structure model may be wrong or deficient  
0 ALERT type 3 Indicator that the structure quality may be low  
6 ALERT type 4 Improvement, methodology, query or suggestion  
0 ALERT type 5 Informative message, check

## Datablock: mw\_176\_1am\_sq

Bond precision: C-C = 0.0041 A

Wavelength=0.71073

Cell: a=12.4414(12) b=14.0266(13) c=14.6235(13)  
 alpha=61.987(4) beta=74.874(5) gamma=85.540(5)  
 Temperature: 100 K

|                        | Calculated                       | Reported           |
|------------------------|----------------------------------|--------------------|
| Volume                 | 2171.9(4)                        | 2171.9(4)          |
| Space group            | P -1                             | P -1               |
| Hall group             | -P 1                             | -P 1               |
| Moiety formula         | C82 H94 N4 O4 Tl2 [+<br>solvent] | ?                  |
| Sum formula            | C82 H94 N4 O4 Tl2 [+<br>solvent] | C94 H122 N4 O4 Tl2 |
| Mr                     | 1608.37                          | 1780.69            |
| Dx, g cm <sup>-3</sup> | 1.230                            | 1.361              |
| Z                      | 1                                | 1                  |
| Mu (mm <sup>-1</sup> ) | 3.748                            | 3.755              |
| F000                   | 808.0                            | 908.0              |
| F000'                  | 802.69                           |                    |
| h, k, lmax             | 16, 18, 19                       | 16, 18, 19         |
| Nref                   | 10898                            | 10869              |
| Tmin, Tmax             | 0.730, 0.880                     | 0.570, 0.750       |
| Tmin'                  | 0.460                            |                    |

Correction method= # Reported T Limits: Tmin=0.570 Tmax=0.750  
 AbsCorr = MULTISCAN

Data completeness= 0.997 Theta(max)= 28.399

R(reflections)= 0.0236( 9224) wR2(reflections)=  
 0.0574( 10869)  
 S = 1.037 Npar= 460

The following ALERTS were generated. Each ALERT has the format  
**test-name\_ALERT\_alert-type\_alert-level.**  
 Click on the hyperlinks for more details of the test.

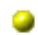

#### Alert level C

|                                                                    |               |
|--------------------------------------------------------------------|---------------|
| PLAT220_ALERT_2_C NonSolvent Resd 1 C Ueq(max)/Ueq(min) Range      | 3.9 Ratio     |
| PLAT905_ALERT_3_C Negative K value in the Analysis of Variance ... | -0.135 Report |
| PLAT911_ALERT_3_C Missing FCF Refl Between Thmin & STh/L= 0.600    | 8 Report      |

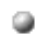

#### Alert level G

FORMU01\_ALERT\_2\_G There is a discrepancy between the atom counts in the  
 \_chemical\_formula\_sum and the formula from the \_atom\_site\* data.  
 Atom count from \_chemical\_formula\_sum: C94 H122 N4 O4 Tl2

Atom count from the \_atom\_site data: C82 H94 N4 O4 Tl2  
 CELLZ01\_ALERT\_1\_G Difference between formula and atom\_site contents detected.  
 CELLZ01\_ALERT\_1\_G ALERT: Large difference may be due to a  
 symmetry error - see SYMMG tests  
 From the CIF: \_cell\_formula\_units\_Z 1  
 From the CIF: \_chemical\_formula\_sum C94 H122 N4 O4 Tl2  
 TEST: Compare cell contents of formula and atom\_site data

| atom | Z*formula | cif sites | diff  |
|------|-----------|-----------|-------|
| C    | 94.00     | 82.00     | 12.00 |
| H    | 122.00    | 94.00     | 28.00 |
| N    | 4.00      | 4.00      | 0.00  |
| O    | 4.00      | 4.00      | 0.00  |
| Tl   | 2.00      | 2.00      | 0.00  |

|                   |                                                  |        |        |
|-------------------|--------------------------------------------------|--------|--------|
| PLAT002_ALERT_2_G | Number of Distance or Angle Restraints on AtSite | 6      | Note   |
| PLAT041_ALERT_1_G | Calc. and Reported SumFormula Strings Differ     | Please | Check  |
| PLAT176_ALERT_4_G | The CIF-Embedded .res File Contains SADI Records | 2      | Report |
| PLAT187_ALERT_4_G | The CIF-Embedded .res File Contains RIGU Records | 1      | Report |
| PLAT301_ALERT_3_G | Main Residue Disorder .....(Resd 1 )             | 7%     | Note   |
| PLAT606_ALERT_4_G | Solvent Accessible VOID(S) in Structure .....    | !      | Info   |
| PLAT793_ALERT_4_G | Model has Chirality at C30 (Centro SPGR)         | 8      | Verify |
| PLAT793_ALERT_4_G | Model has Chirality at C31 (Centro SPGR)         | R      | Verify |
| PLAT802_ALERT_4_G | CIF Input Record(s) with more than 80 Characters | 1      | Info   |
| PLAT860_ALERT_3_G | Number of Least-Squares Restraints .....         | 25     | Note   |
| PLAT869_ALERT_4_G | ALERTS Related to the Use of SQUEEZE Suppressed  | !      | Info   |
| PLAT912_ALERT_4_G | Missing # of FCF Reflections Above STh/L= 0.600  | 22     | Note   |
| PLAT933_ALERT_2_G | Number of HKL-OMIT Records in Embedded .res File | 6      | Note   |
| PLAT978_ALERT_2_G | Number C-C Bonds with Positive Residual Density. | 8      | Info   |

---

0 **ALERT level A** = Most likely a serious problem - resolve or explain  
 0 **ALERT level B** = A potentially serious problem, consider carefully  
 3 **ALERT level C** = Check. Ensure it is not caused by an omission or oversight  
 17 **ALERT level G** = General information/check it is not something unexpected

3 ALERT type 1 CIF construction/syntax error, inconsistent or missing data  
 5 ALERT type 2 Indicator that the structure model may be wrong or deficient  
 4 ALERT type 3 Indicator that the structure quality may be low  
 8 ALERT type 4 Improvement, methodology, query or suggestion  
 0 ALERT type 5 Informative message, check

---

## Datablock: mw\_1751filfil\_gelbm

---

Bond precision: C-C = 0.0029 A

Wavelength=0.71073

|              |              |                 |              |
|--------------|--------------|-----------------|--------------|
| Cell:        | a=22.055(11) | b=17.741(9)     | c=22.328(12) |
|              | alpha=90     | beta=118.486(8) | gamma=90     |
| Temperature: | 100 K        |                 |              |

- 0 **ALERT level A** = Most likely a serious problem - resolve or explain  
0 **ALERT level B** = A potentially serious problem, consider carefully  
3 **ALERT level C** = Check. Ensure it is not caused by an omission or oversight

6 **ALERT level G** = General information/check it is not something unexpected

0 ALERT type 1 CIF construction/syntax error, inconsistent or missing data

3 ALERT type 2 Indicator that the structure model may be wrong or deficient

1 ALERT type 3 Indicator that the structure quality may be low

3 ALERT type 4 Improvement, methodology, query or suggestion

2 ALERT type 5 Informative message, check

---

## Datablock: mw\_175\_2m

---

Bond precision: C-C = 0.0024 A Wavelength=1.54178

Cell: a=12.7707(9) b=18.3465(8) c=20.262(3)

alpha=100.364(5) beta=92.789(7) gamma=108.952(4)

Temperature: 100 K

|                        | Calculated                      | Reported               |
|------------------------|---------------------------------|------------------------|
| Volume                 | 4387.4(8)                       | 4387.4(7)              |
| Space group            | P -1                            | P -1                   |
| Hall group             | -P 1                            | -P 1                   |
| Moiety formula         | 2(C43 H51 Ga N2 O2), 2.5(C6 H6) | ?                      |
| Sum formula            | C101 H117 Ga2 N4 O4             | C50.50 H58.50 Ga N2 O2 |
| Mr                     | 1590.43                         | 795.21                 |
| Dx, g cm <sup>-3</sup> | 1.204                           | 1.204                  |
| Z                      | 2                               | 4                      |
| Mu (mm <sup>-1</sup> ) | 1.160                           | 1.160                  |
| F000                   | 1690.0                          | 1690.0                 |
| F000'                  | 1688.85                         |                        |
| h, k, lmax             | 16, 23, 25                      | 16, 23, 25             |
| Nref                   | 19283                           | 19089                  |
| Tmin, Tmax             | 0.850, 0.943                    | 0.650, 0.750           |
| Tmin'                  | 0.836                           |                        |

Correction method= # Reported T Limits: Tmin=0.650 Tmax=0.750

AbsCorr = MULTII-SCAN

Data completeness= 0.990 Theta(max)= 80.731

R(reflections)= 0.0301( 16240) wR2(reflections)= 0.0768( 19089)

S = 1.043 Npar= 1133

---

The following ALERTS were generated. Each ALERT has the format

**test-name\_ALERT\_alert-type\_alert-level.**

Click on the hyperlinks for more details of the test.

---

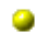

#### **Alert level C**

|                   |                                                  |        |   |                         |        |        |
|-------------------|--------------------------------------------------|--------|---|-------------------------|--------|--------|
| PLAT220_ALERT_2_C | NonSolvent                                       | Resd 1 | C | Ueq(max)/Ueq(min) Range | 3.5    | Ratio  |
| PLAT905_ALERT_3_C | Negative K value in the Analysis of Variance ... |        |   |                         | -0.040 | Report |
| PLAT911_ALERT_3_C | Missing FCF Refl Between Thmin & STh/L=          | 0.600  |   |                         | 8      | Report |

---

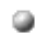

#### **Alert level G**

|                   |                                                  |       |        |
|-------------------|--------------------------------------------------|-------|--------|
| PLAT045_ALERT_1_G | Calculated and Reported Z Differ by a Factor ... | 0.500 | Check  |
| PLAT187_ALERT_4_G | The CIF-Embedded .res File Contains RIGU Records | 1     | Report |
| PLAT301_ALERT_3_G | Main Residue Disorder .....(Resd 1 )             | 25%   | Note   |
| PLAT720_ALERT_4_G | Number of Unusual/Non-Standard Labels .....      | 257   | Note   |
| PLAT802_ALERT_4_G | CIF Input Record(s) with more than 80 Characters | 1     | Info   |
| PLAT860_ALERT_3_G | Number of Least-Squares Restraints .....         | 168   | Note   |
| PLAT912_ALERT_4_G | Missing # of FCF Reflections Above STh/L= 0.600  | 188   | Note   |
| PLAT978_ALERT_2_G | Number C-C Bonds with Positive Residual Density. | 15    | Info   |

---

0 **ALERT level A** = Most likely a serious problem - resolve or explain  
0 **ALERT level B** = A potentially serious problem, consider carefully  
3 **ALERT level C** = Check. Ensure it is not caused by an omission or oversight  
8 **ALERT level G** = General information/check it is not something unexpected

1 ALERT type 1 CIF construction/syntax error, inconsistent or missing data  
2 ALERT type 2 Indicator that the structure model may be wrong or deficient  
4 ALERT type 3 Indicator that the structure quality may be low  
4 ALERT type 4 Improvement, methodology, query or suggestion  
0 ALERT type 5 Informative message, check

---

---

It is advisable to attempt to resolve as many as possible of the alerts in all categories. Often the minor alerts point to easily fixed oversights, errors and omissions in your CIF or refinement strategy, so attention to these fine details can be worthwhile. In order to resolve some of the more serious problems it may be necessary to carry out additional measurements or structure refinements. However, the purpose of your study may justify the reported deviations and the more serious of these should normally be commented upon in the discussion or experimental section of a paper or in the "special\_details" fields of the CIF. checkCIF was carefully designed to identify outliers and unusual parameters, but every test has its limitations and alerts that are not important in a particular case may appear. Conversely, the absence of alerts does not guarantee there are no aspects of the results needing attention. It is up to the individual to critically assess their own results and, if necessary, seek expert advice.

### **Publication of your CIF in IUCr journals**

A basic structural check has been run on your CIF. These basic checks will be run on all CIFs submitted for publication in IUCr journals (*Acta Crystallographica*, *Journal of Applied Crystallography*, *Journal of Synchrotron Radiation*); however, if you intend to submit to *Acta Crystallographica Section C* or *E* or *IUCrData*, you should make sure that full publication checks are run on the final version of your CIF prior to submission.

### **Publication of your CIF in other journals**

Please refer to the *Notes for Authors* of the relevant journal for any special instructions relating to CIF submission.



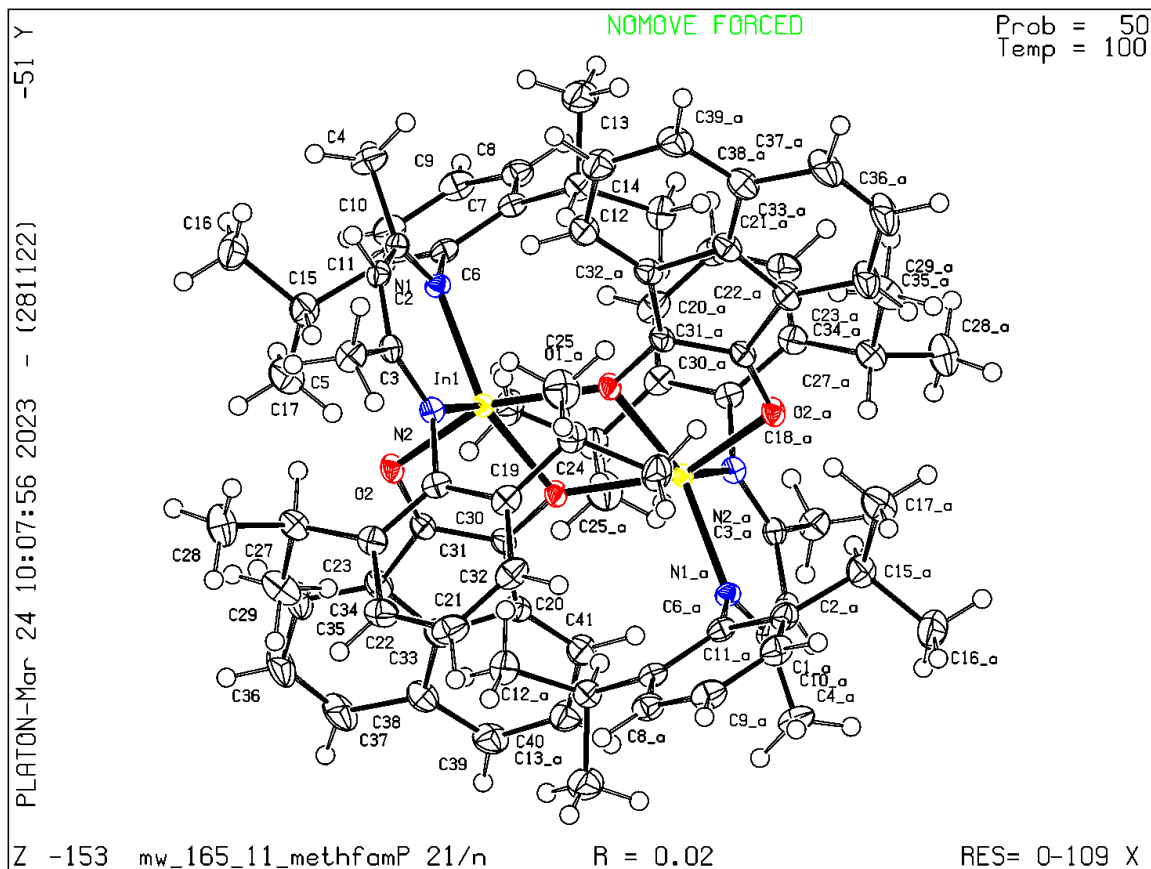

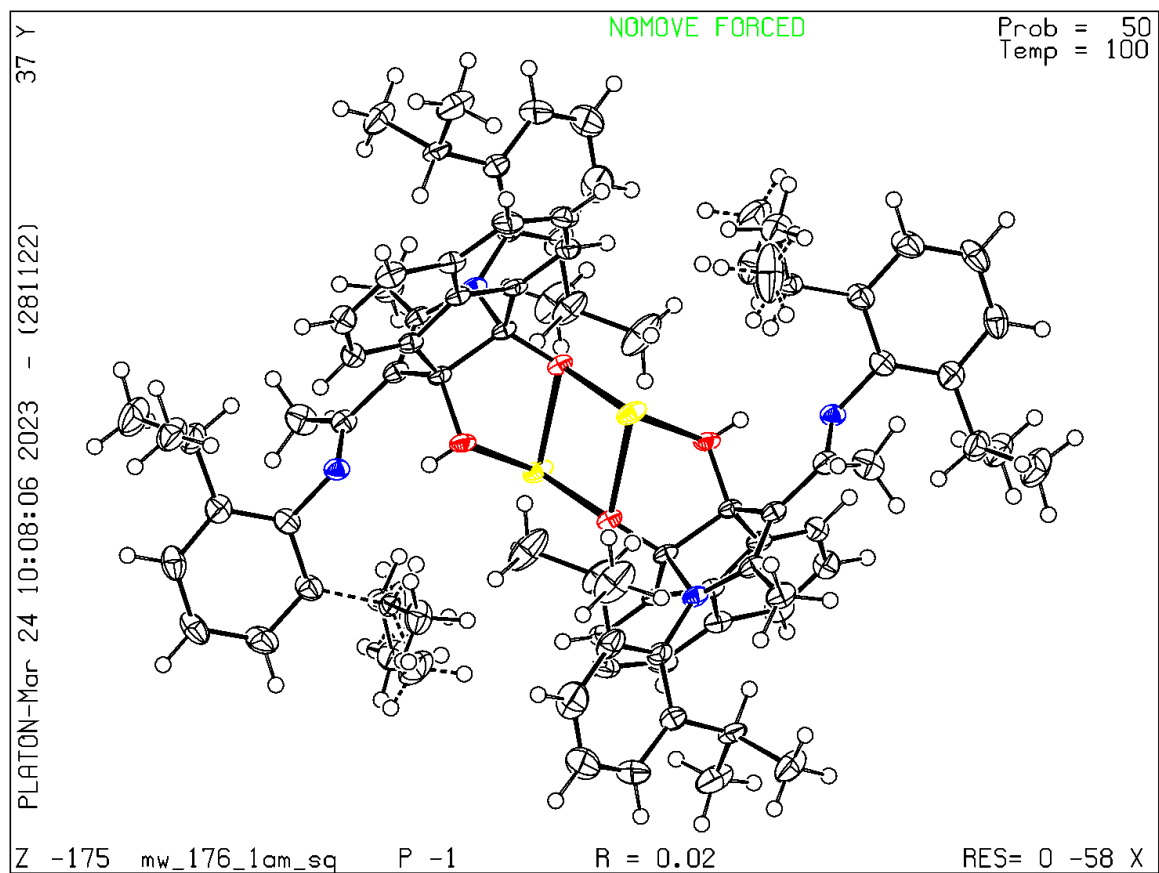

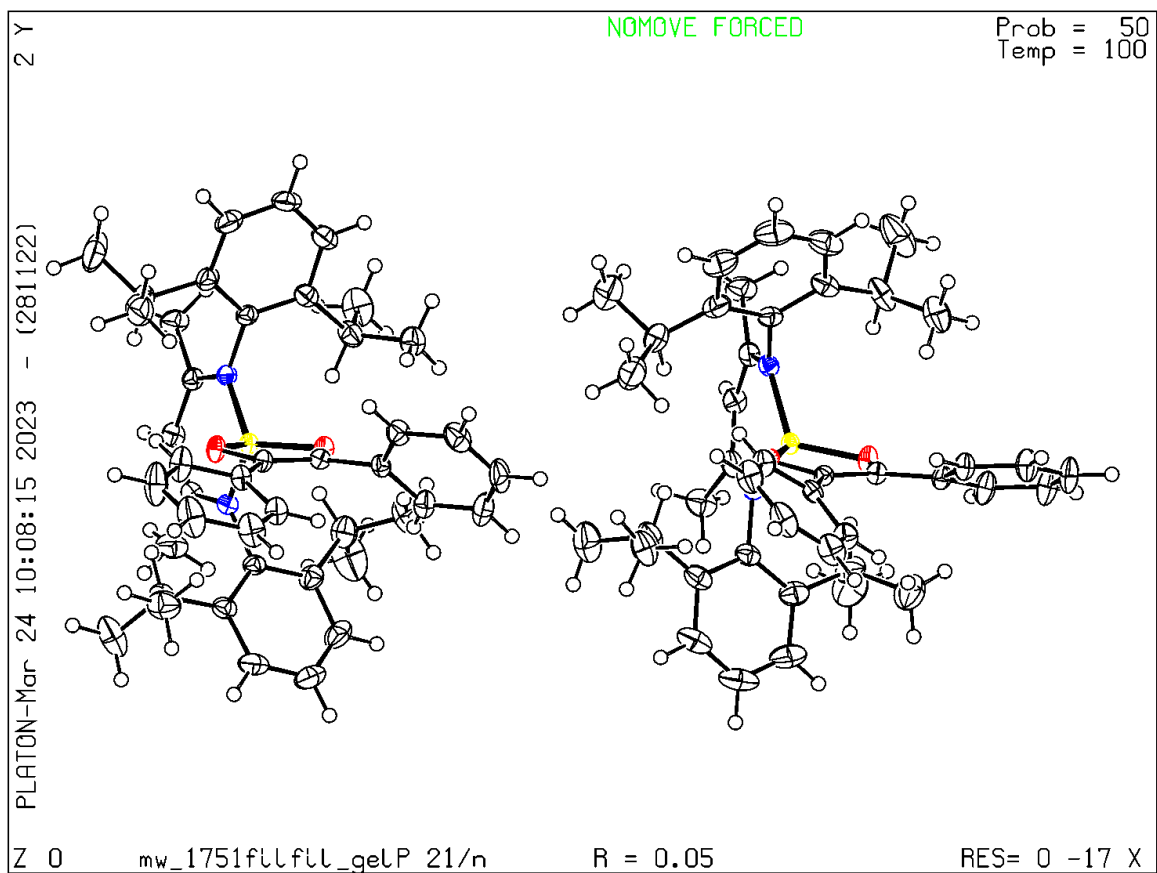

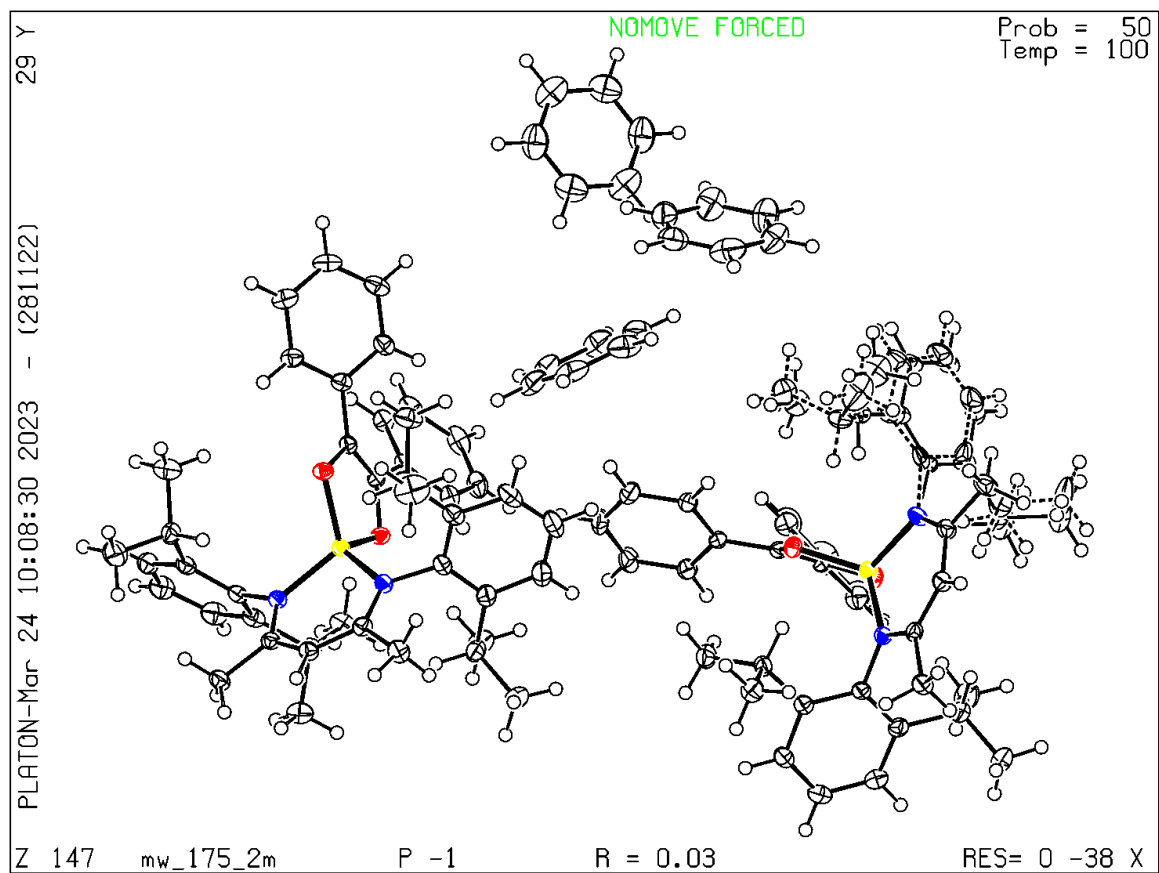

Supplement: s1 [file s1]
