# Supplementary material for: Synthesis of 5-Metalla-Spiro[4.5]Heterodecenes by [1,4]-Cycloaddition Reaction of Group 13 Diyls with 1,2-Diketones
Source: MDPI journal article supplement (doi:10.3390/chemistry5020064), 2023-04-20
Supplement: s1 [file s1]

# Synthesis of 5-Metalla-spiro[4.5]heterodecenes by [1,4]-Cycloaddition Reaction of Group 13 Diyls with 1,2 Diketones

*Hanns M. Weinert,<sup>1</sup> Christoph Wölper,<sup>1</sup> and Stephan Schulz<sup>1,2,\*</sup>*

<sup>1</sup> Institute of Inorganic Chemistry, University of Duisburg-Essen, Universitätsstr.5–7, 45141 Essen (Germany)

<sup>2</sup> Center for Nanointegration Duisburg-Essen (CENIDE) University of Duisburg-Essen, Carl-Benz-Straße 199, 47057 Duisburg (Germany)

\* Correspondence author: [stephan.schulz@uni-due.de](mailto:stephan.schulz@uni-due.de)

## Content

**Fig. S1–3.**  $^1\text{H}$ ,  $^{13}\text{C}$  and ATR-IR spectra of  $\text{LGa}(\text{C}_4\text{H}_6\text{O}_2)$  (**1**).

**Fig. S4–7.**  $^1\text{H}$ ,  $^{13}\text{C}$  and ATR-IR spectra of  $\text{LGa}(\text{C}_8\text{H}_{12}\text{O}_4)$  (**2**).

**Fig. S8–10.**  $^1\text{H}$ ,  $^{13}\text{C}$  and ATR-IR spectra of  $\text{LGa}(\text{C}_{11}\text{H}_{12}\text{O}_3)$  (**3**).

**Fig. S11–13.**  $^1\text{H}$ ,  $^{13}\text{C}$  and ATR-IR spectra of  $\text{LAl}(\text{C}_{12}\text{H}_6\text{O}_2)$  (**4**).

**Fig. S14–17.**  $^1\text{H}$ ,  $^{13}\text{C}$ , DEPTQ  $^{13}\text{C}$  and ATR-IR spectrum of  $\text{LGa}(\text{C}_{12}\text{H}_6\text{O}_2)$  (**5**).

**Fig. S18–20.**  $^1\text{H}$ ,  $^{13}\text{C}$  and ATR-IR spectrum of  $\text{LIn}(\text{C}_{12}\text{H}_6\text{O}_2)$  (**6**).

**Fig. S21.**  $^1\text{H}$  NMR spectrum (400 MHz,  $\text{C}_6\text{D}_6$ , 25 °C) of the solid (**7**) obtained from the reaction of  $\text{LTl}$  with acenaphthenequinone.

**Fig. S22–24.**  $^1\text{H}$ , DEPTQ  $^{13}\text{C}$  and ATR-IR spectra of  $\text{LAl}(\text{C}_{14}\text{H}_{10}\text{O}_2)$  (**8**).

**Fig. S25–27.**  $^1\text{H}$ , DEPTQ  $^{13}\text{C}$  and ATR-IR spectra of  $\text{LGa}(\text{C}_{14}\text{H}_{10}\text{O}_2)$  (**9**).

**Fig. S28–31.**  $^1\text{H}$ , DEPTQ  $^{13}\text{C}$  and ATR-IR spectra of  $\text{LIn}(\text{C}_{14}\text{H}_{10}\text{O}_2) \cdot \text{ACN}$  (**10**).

**Fig. S32–34.**  $^1\text{H}$ ,  $^{13}\text{C}$  and ATR-IR spectra of  $\text{LAl}(\text{C}_{14}\text{H}_{10}\text{O}_2)_2$  (**11**).

**Fig. S35–38.**  $^1\text{H}$ ,  $^{13}\text{C}$ , HMBC and ATR-IR spectra of  $(\text{LAl})_2(\text{C}_{14}\text{H}_{10}\text{O}_2)$  (**12**).

**Fig. S39–44.**  $^1\text{H}$ ,  $^{11}\text{B}$ ,  $^{13}\text{C}$ ,  $^{13}\text{C}\{^{19}\text{F}\}$ ,  $^{19}\text{F}$  and ATR-IR spectra of  $\text{L}'\text{B}(\text{C}_{14}\text{H}_{10}\text{O}_2)$  (**13**).

**Fig. S45–49.**  $^1\text{H}$ ,  $^{11}\text{B}$ ,  $^{13}\text{C}$ ,  $^{19}\text{F}$  and ATR-IR spectra of  $\text{L}'\text{BH}_2$  (**14**).

**Fig. S50.** Reaction of  $\text{LAl}$  with one equivalent of butanedione. Bottom:  $\text{LAl}$  before addition.

**Fig. S51.** Reaction of  $\text{LIn}$  with one equivalent of butanedione. Bottom:  $\text{LIn}$  before addition.

**Fig. S52.** Reaction of  $\text{LTl}$  with one equivalent of butanedione. Bottom:  $\text{LTl}$  before addition.

**Table S1a–d.** Crystallographic data of **1**, **2**, and **4–13**.

**Fig. S53–57.** Molecular structures of **8**, **9**, **10**, **12b**, and **13** in their crystals.

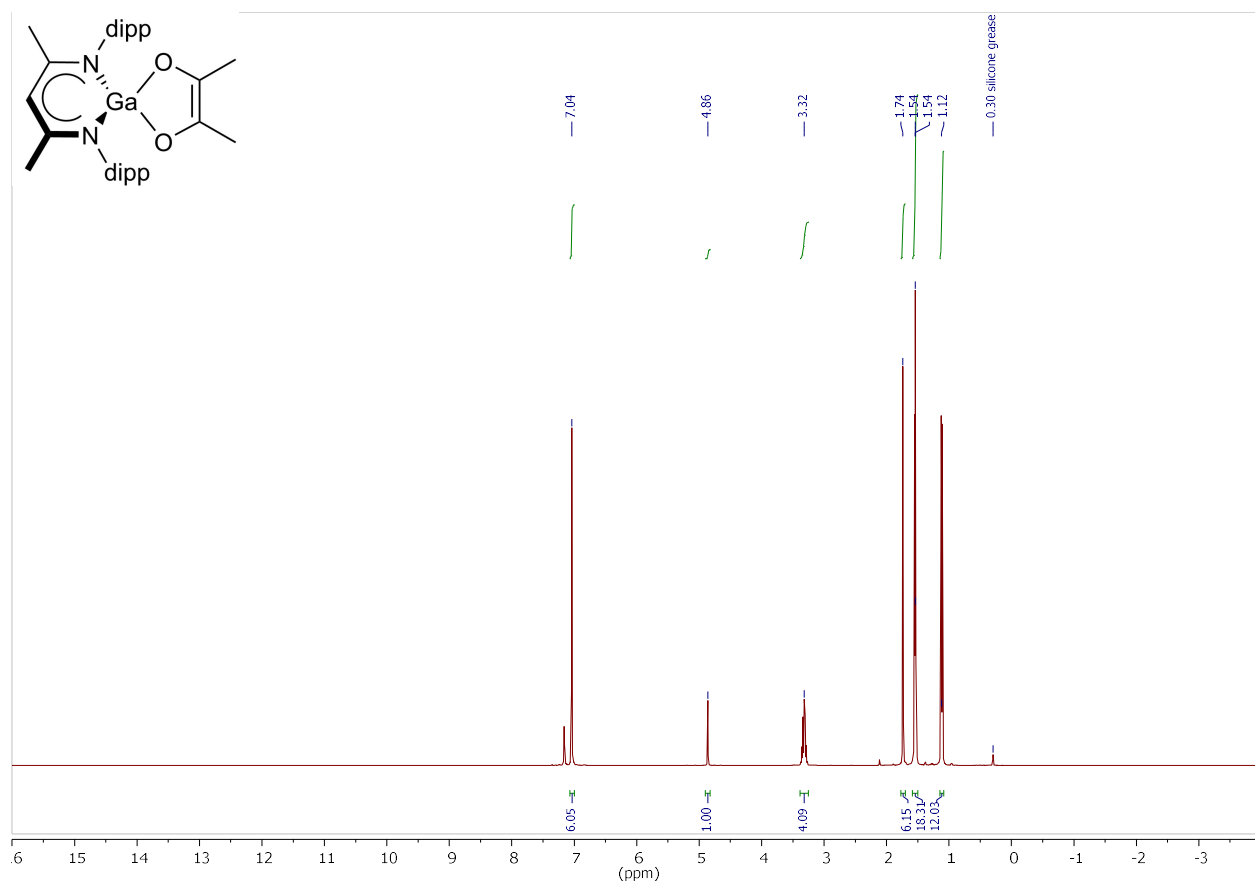

**Fig. S1.** <sup>1</sup>H NMR spectrum (400 MHz, C<sub>6</sub>D<sub>6</sub>, 25 °C) of LGa(C<sub>4</sub>H<sub>6</sub>O<sub>2</sub>) (1).

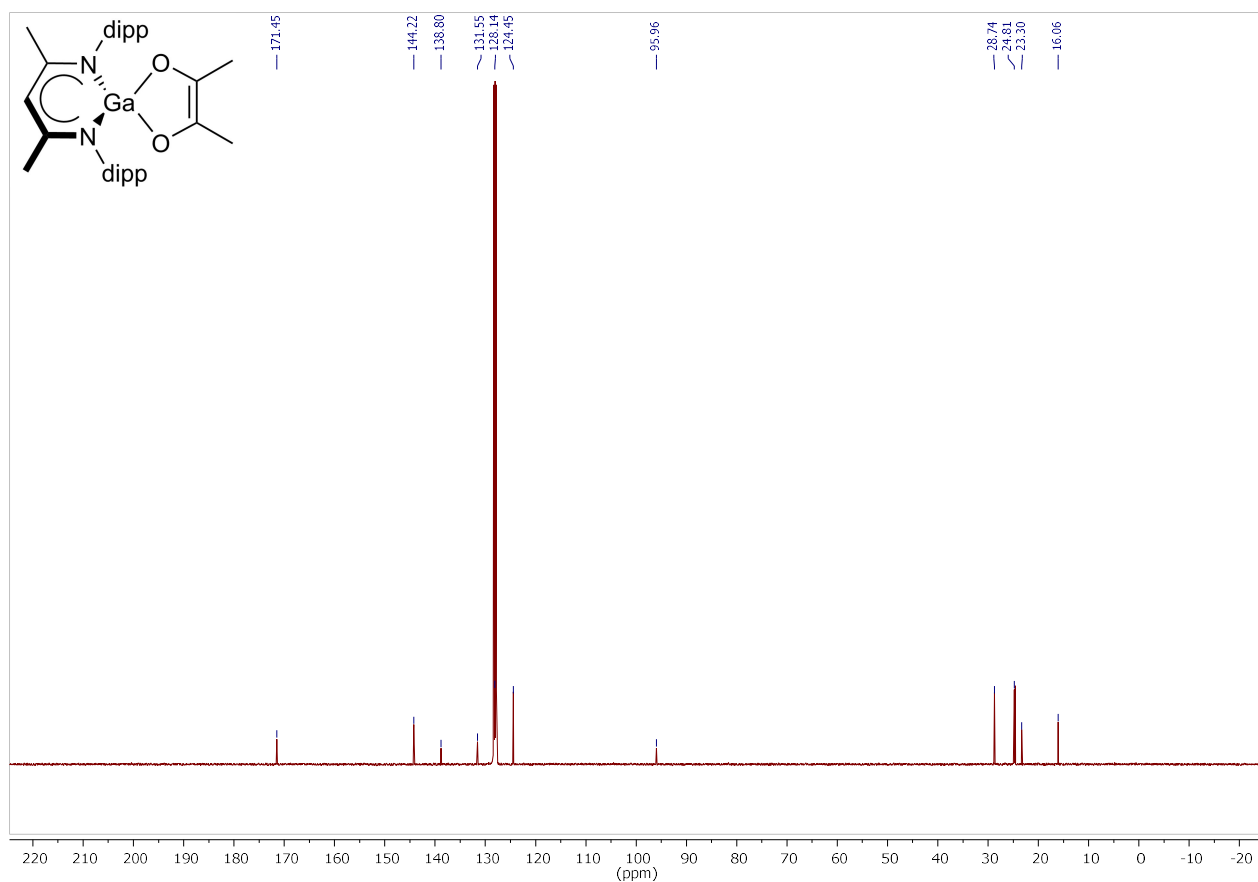

**Fig. S2.** <sup>13</sup>C NMR spectrum (100.6 MHz, C<sub>6</sub>D<sub>6</sub>, 25 °C) of LGa(C<sub>4</sub>H<sub>6</sub>O<sub>2</sub>) (1).

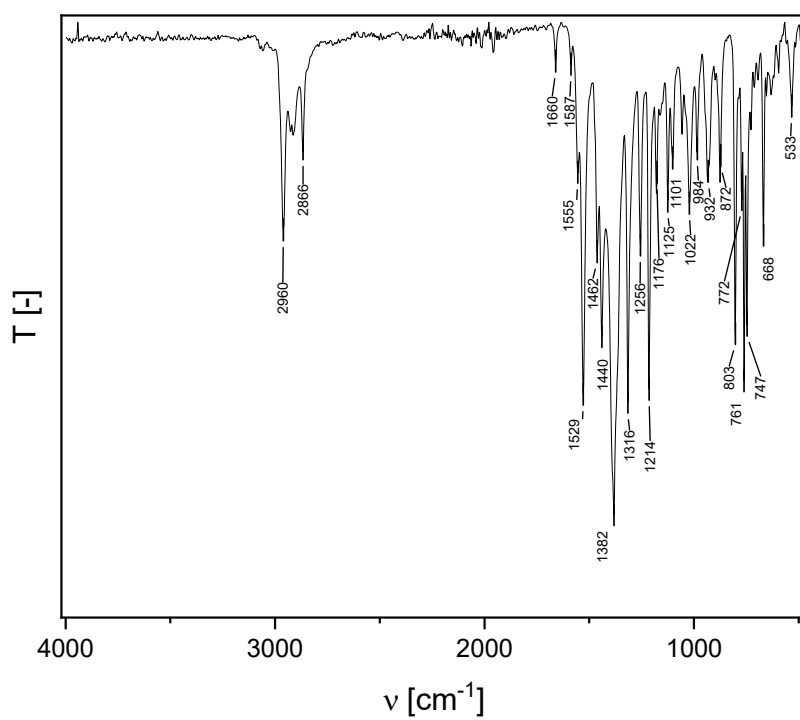

**Fig. S3.** ATR-IR spectrum of LGa(C<sub>4</sub>H<sub>6</sub>O<sub>2</sub>) (**1**).

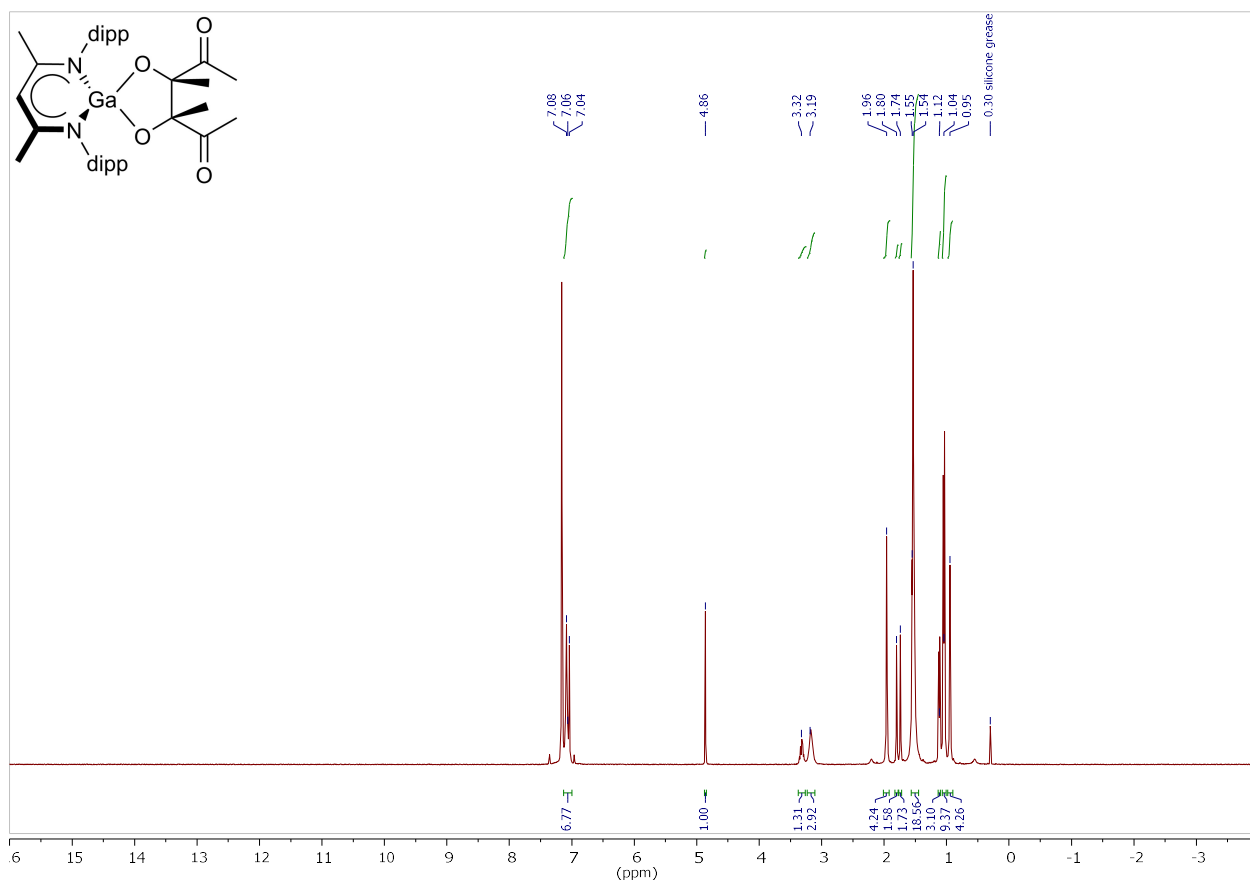

**Fig. S4.** <sup>1</sup>H NMR spectrum (400 MHz, C<sub>6</sub>D<sub>6</sub>, 25 °C) of LGa(C<sub>8</sub>H<sub>12</sub>O<sub>14</sub>) (**2**).

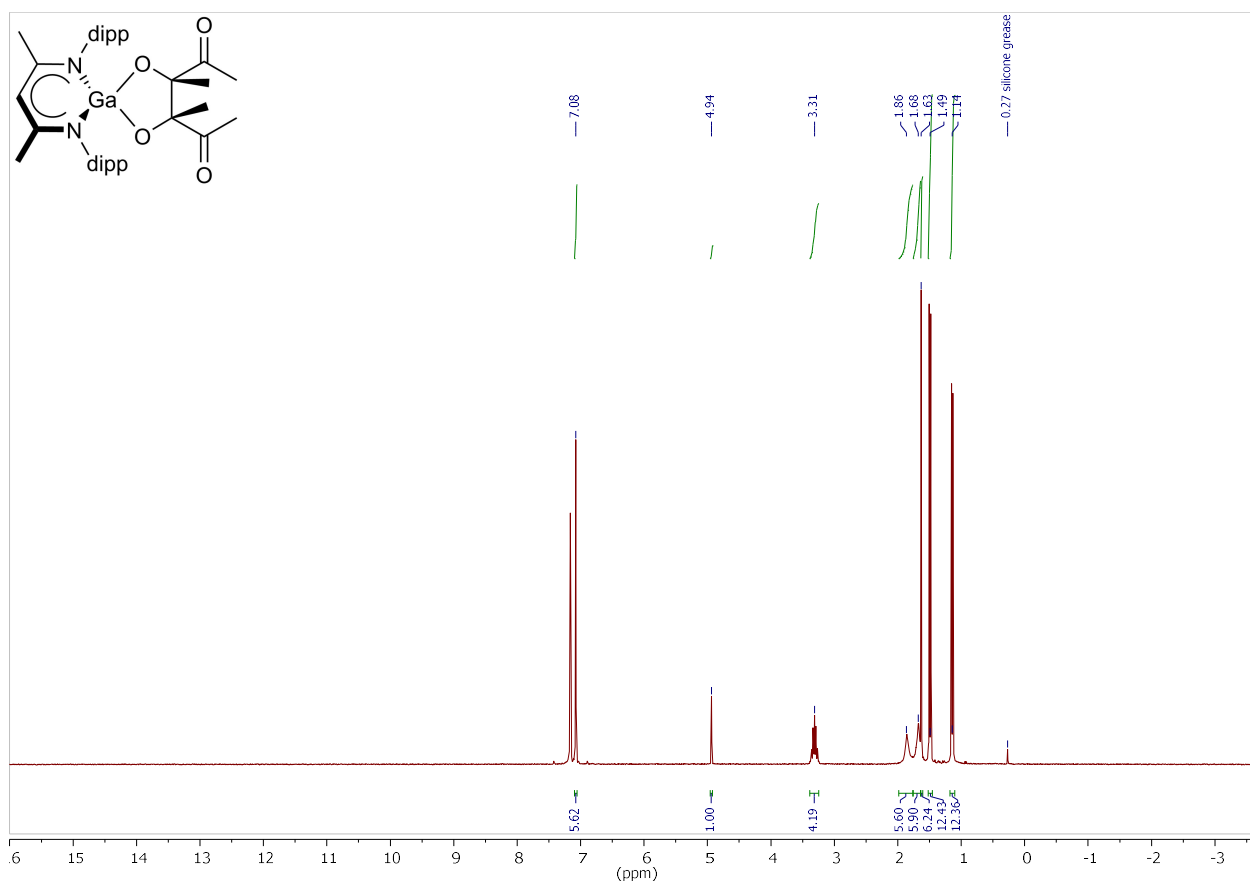

**Fig. S5.**  $^1\text{H}$  NMR spectrum (300 MHz,  $\text{C}_6\text{D}_6$ , 80 °C) of  $\text{LGa}(\text{C}_8\text{H}_{12}\text{O}_{14})$  (2).

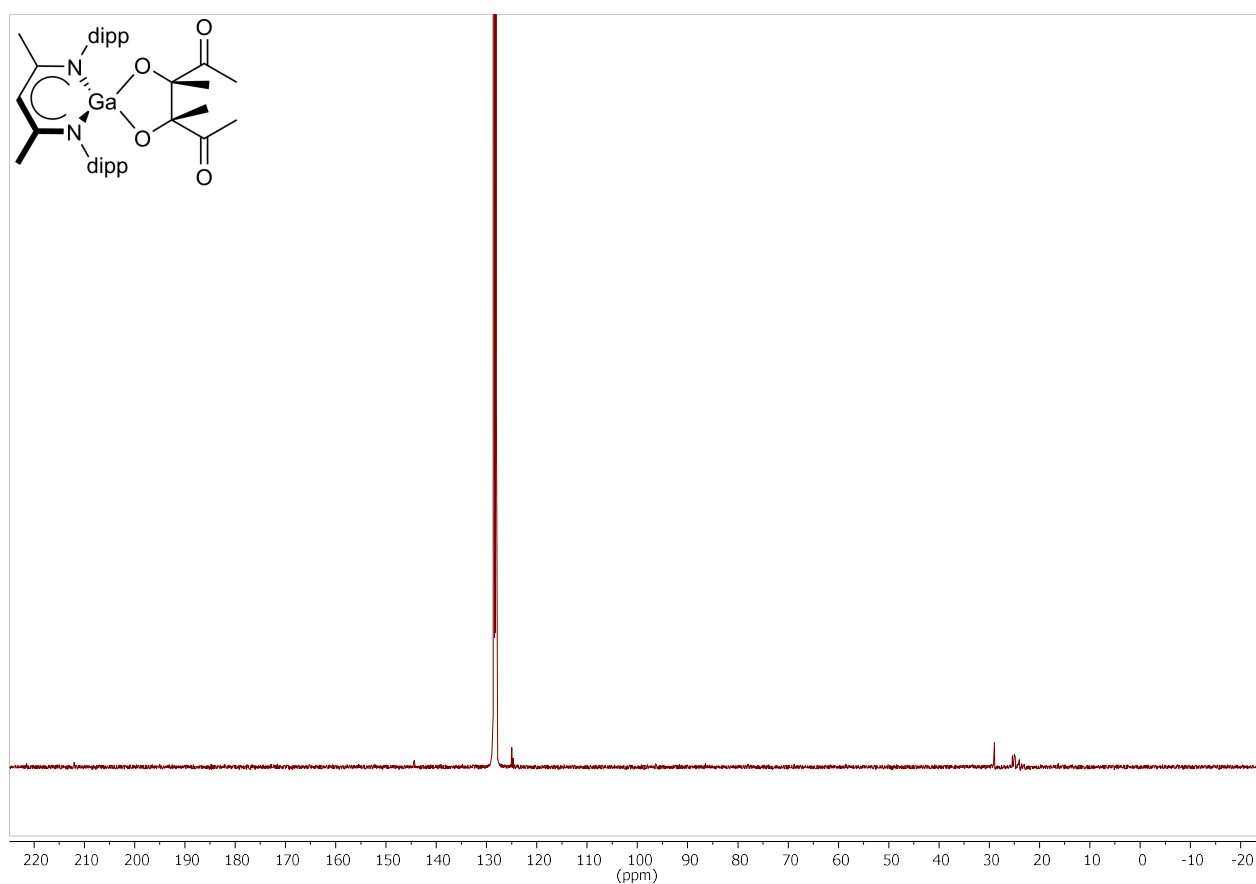

**Fig. S6.**  $^{13}\text{C}$  NMR spectrum (100.6 MHz,  $\text{C}_6\text{D}_6$ , 25 °C) of  $\text{LGa}(\text{C}_8\text{H}_{12}\text{O}_{14})$  (2).

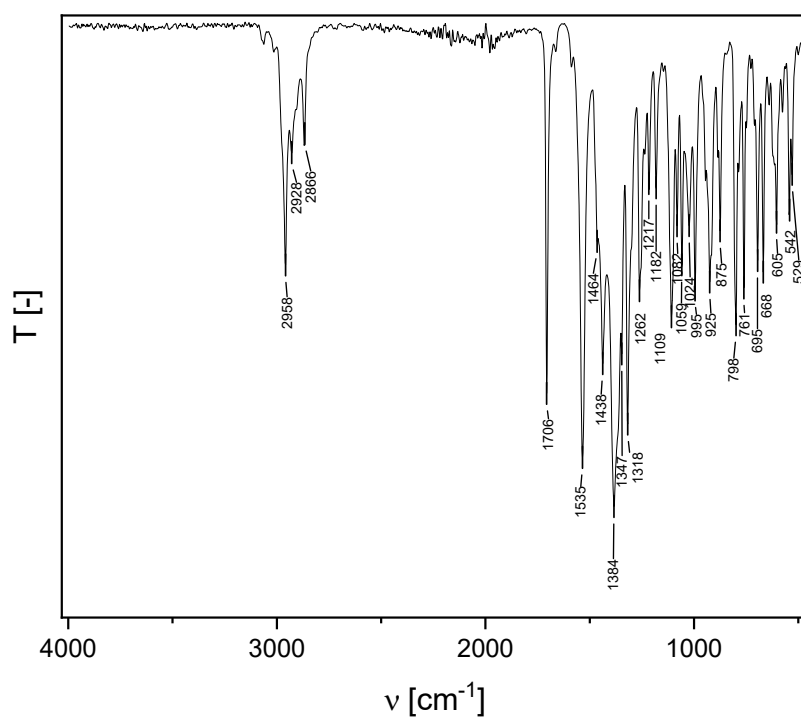

**Fig. S7.** ATR-IR spectrum of  $\text{LGa}(\text{C}_8\text{H}_{12}\text{O}_{14})$  (**2**).

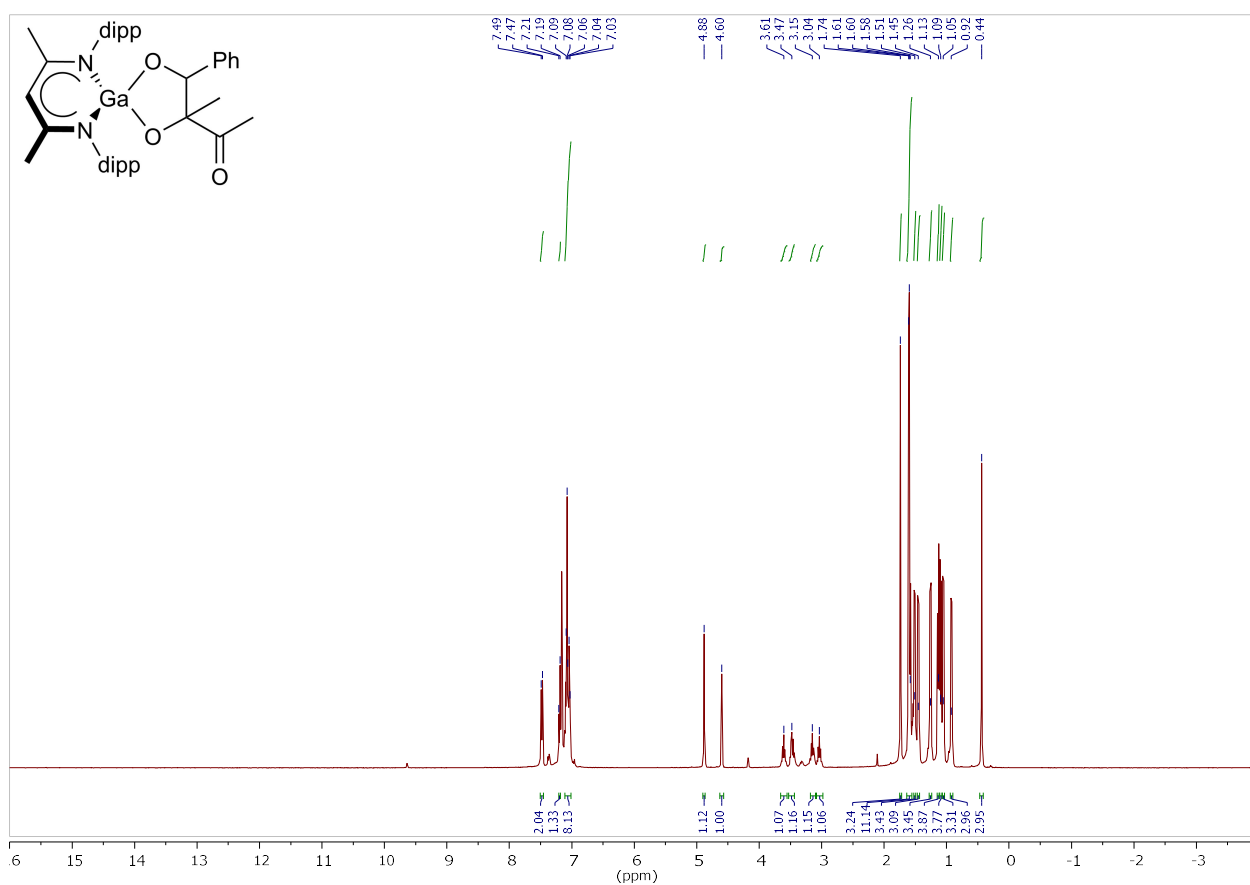

**Fig. S8.**  $^1\text{H}$  NMR spectrum (400 MHz,  $\text{C}_6\text{D}_6$ , 25 °C) of  $\text{LGa}(\text{C}_{11}\text{H}_{12}\text{O}_3)$  (**3**).

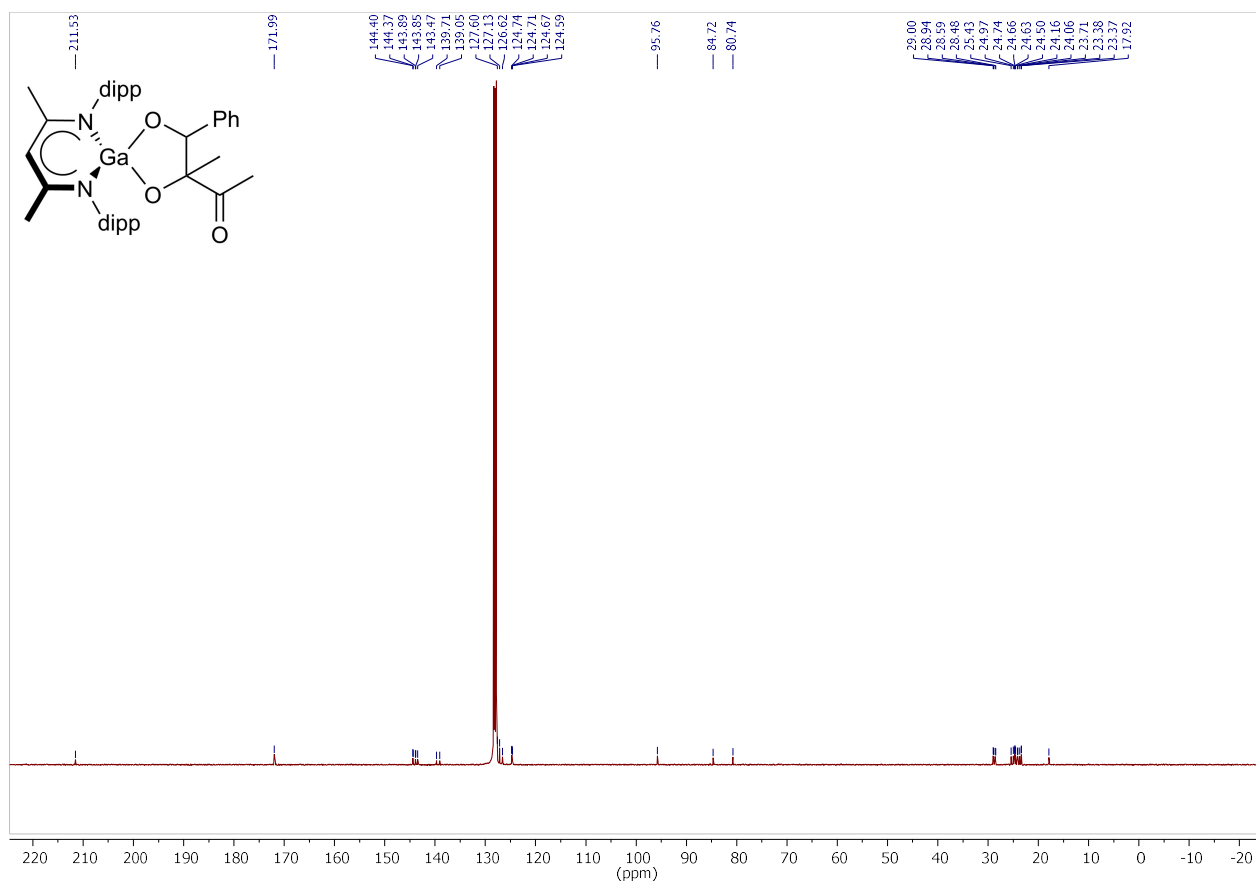

**Fig. S9.**  $^{13}\text{C}$  NMR spectrum (100.6 MHz,  $\text{C}_6\text{D}_6$ , 25 °C) of  $\text{LGa}(\text{C}_{11}\text{H}_{12}\text{O}_3)$  (**3**).

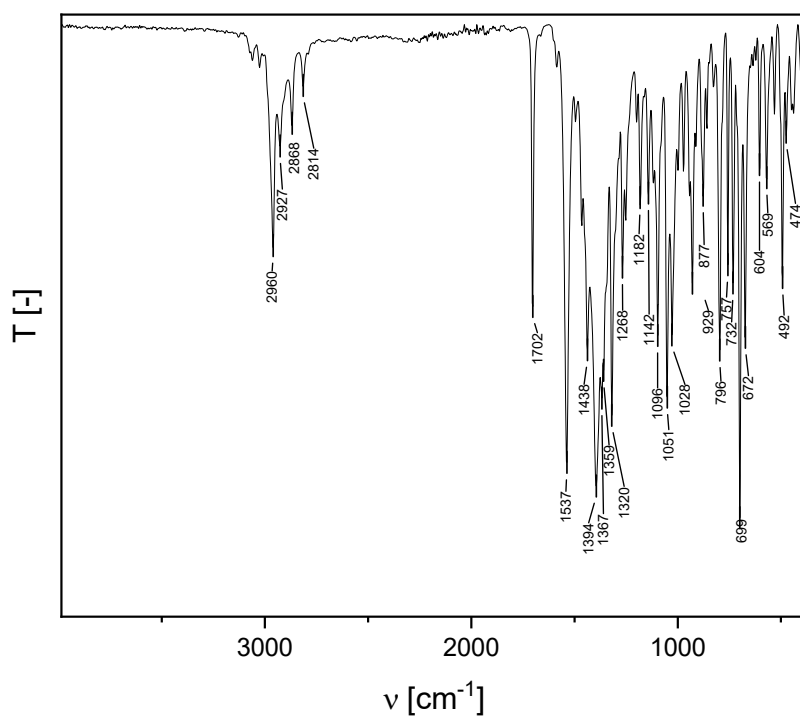

**Fig. S10.** ATR-IR spectrum of  $\text{LGa}(\text{C}_{11}\text{H}_{12}\text{O}_3)$  (**3**).

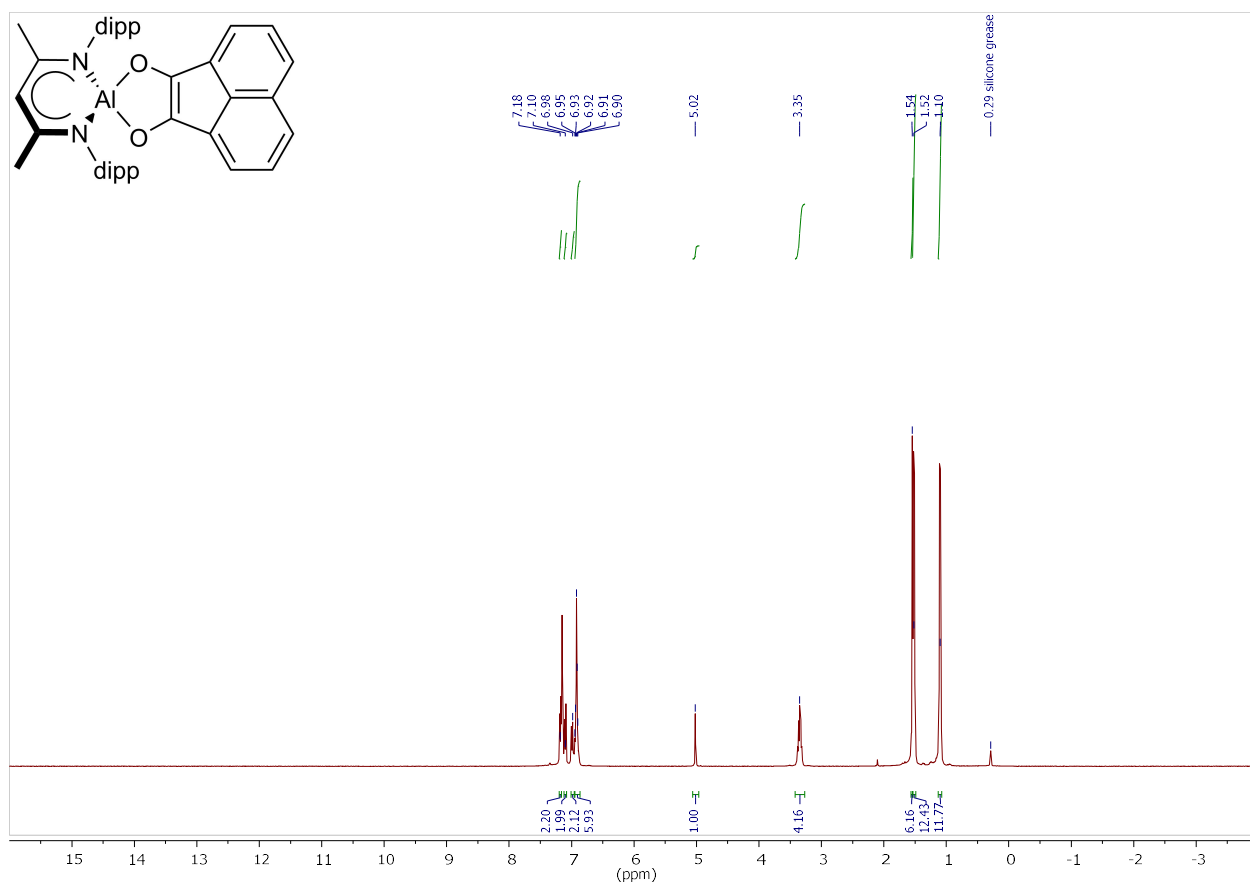

**Fig. S11.**  $^1\text{H}$  NMR spectrum (400 MHz,  $\text{C}_6\text{D}_6$ , 25  $^\circ\text{C}$ ) of  $\text{LAi}(\text{C}_{12}\text{H}_6\text{O}_2)$  (4).

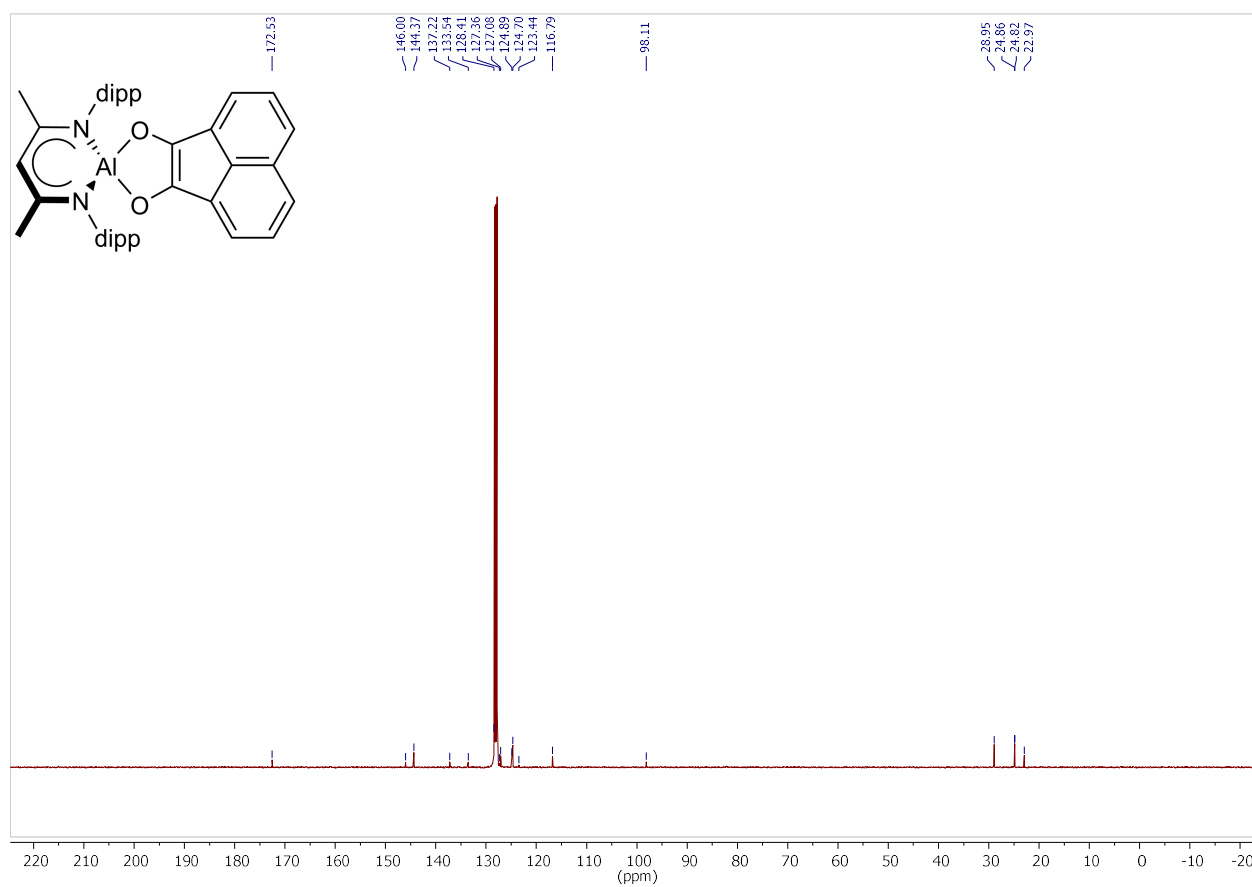

**Fig. S12.**  $^{13}\text{C}$  NMR spectrum (100.6 MHz,  $\text{C}_6\text{D}_6$ , 25  $^\circ\text{C}$ ) of  $\text{LAi}(\text{C}_{12}\text{H}_6\text{O}_2)$  (4).

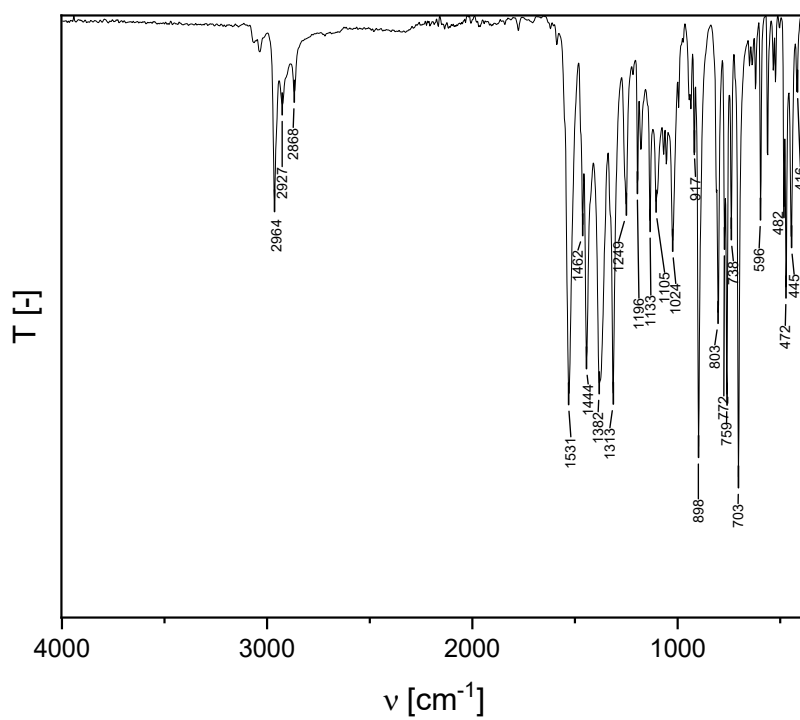

**Fig. S13.** ATR-IR spectrum of LAI ( $C_{12}H_6O_2$ ) (**4**).

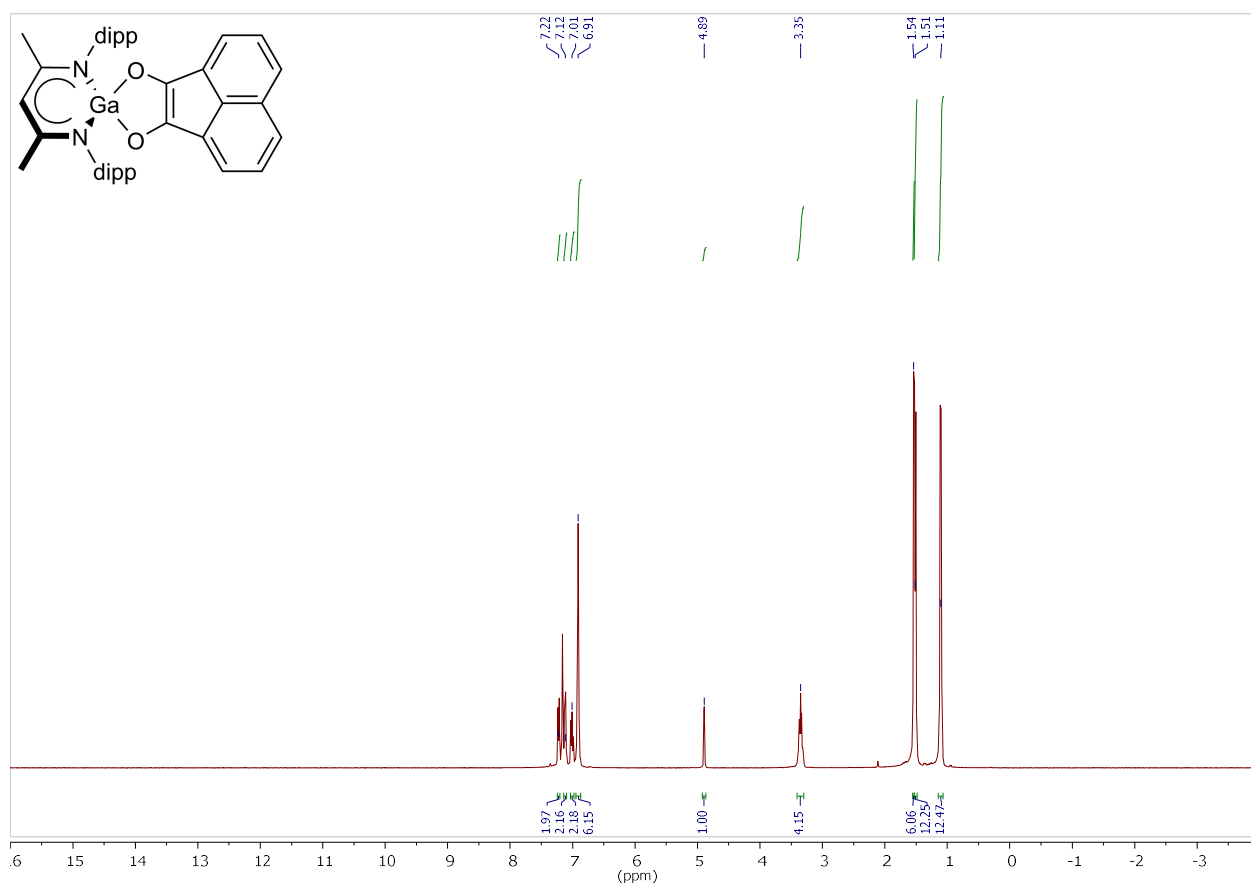

**Fig. S14.**  $^1H$  NMR spectrum (400 MHz,  $C_6D_6$ , 25 °C) of  $LGa(C_{12}H_6O_2)$  (**5**).

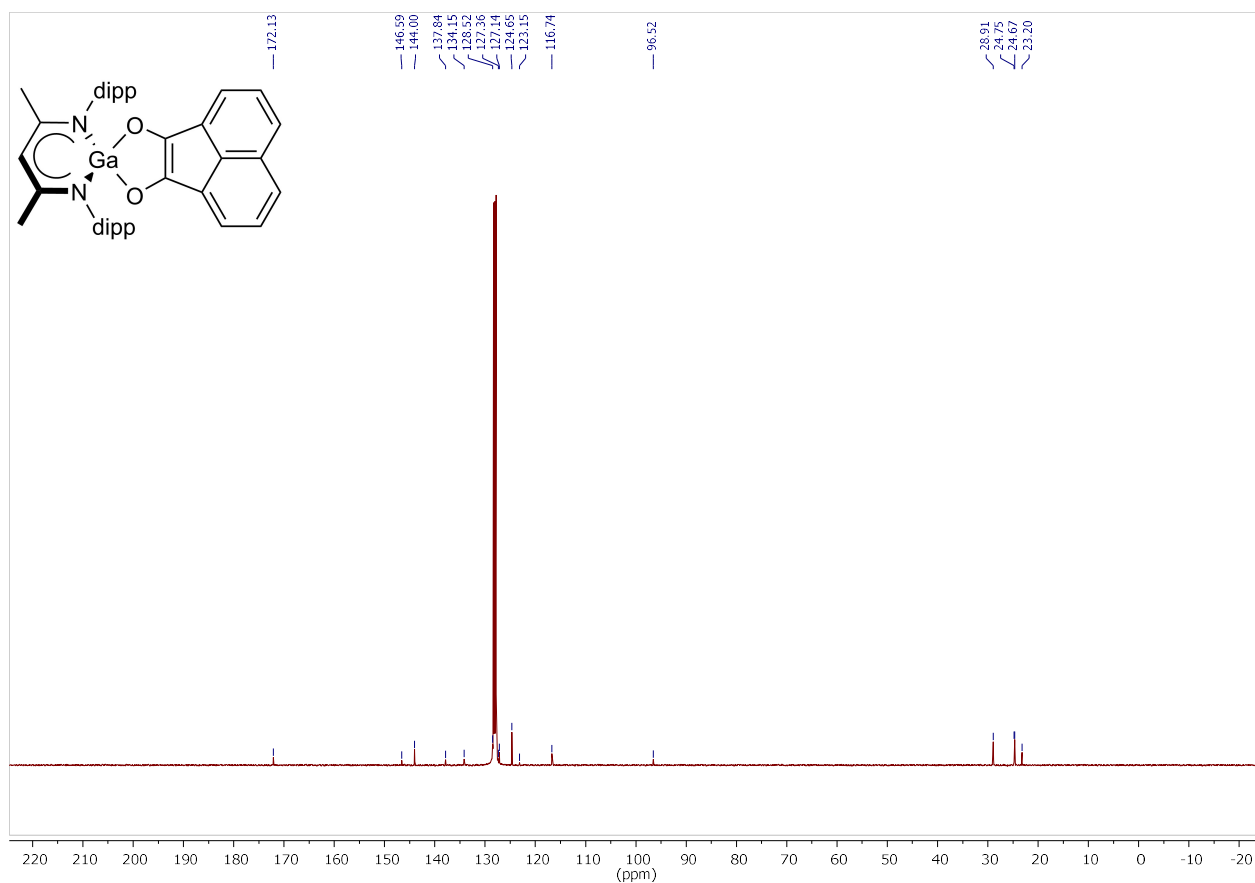

**Fig. S15.**  $^{13}\text{C}$  NMR spectrum (100.6 MHz,  $\text{C}_6\text{D}_6$ , 25 °C) of  $\text{LGa}(\text{C}_{12}\text{H}_6\text{O}_2)$  (5).

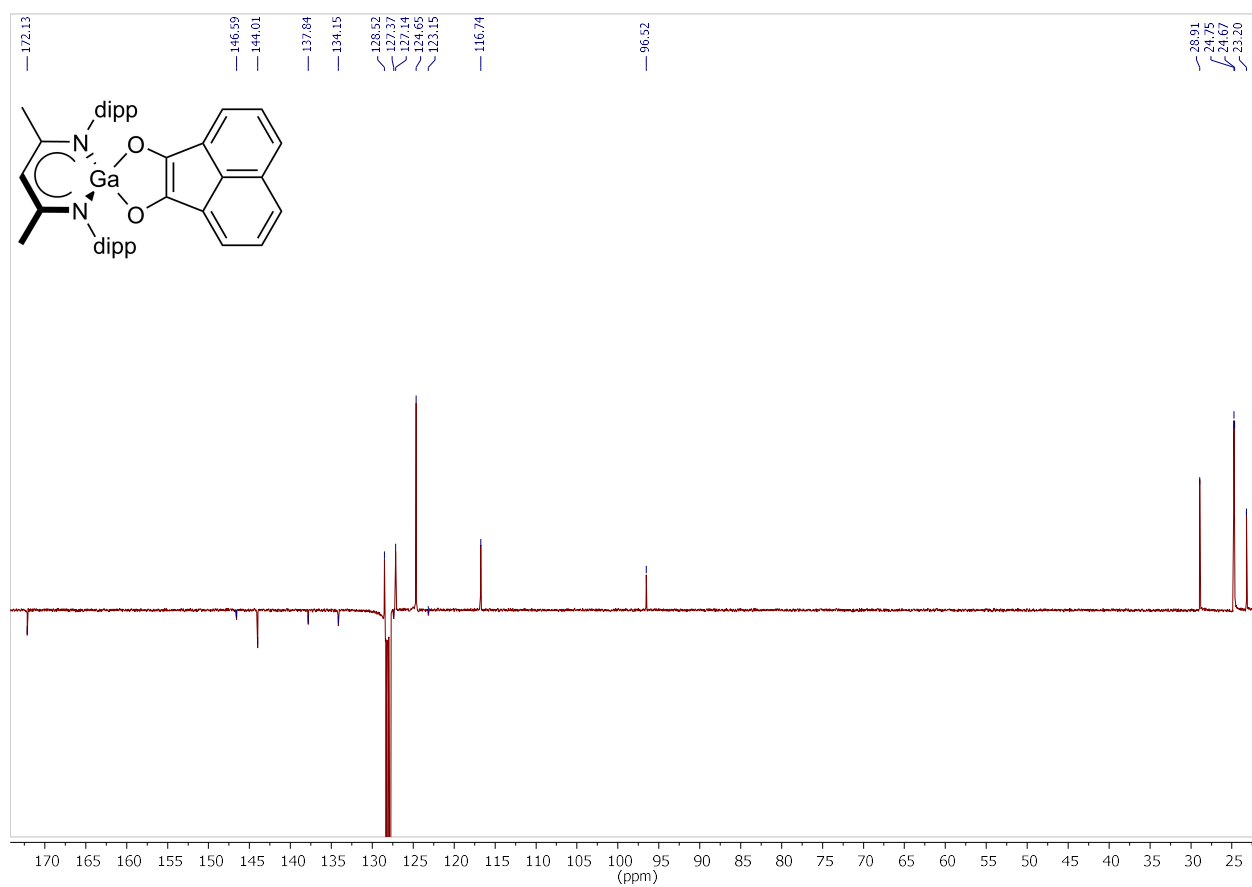

**Fig. S16.** DEPTQ  $^{13}\text{C}$  NMR spectrum (100.6 MHz,  $\text{C}_6\text{D}_6$ , 25 °C) of  $\text{LGa}(\text{C}_{12}\text{H}_6\text{O}_2)$  (5).

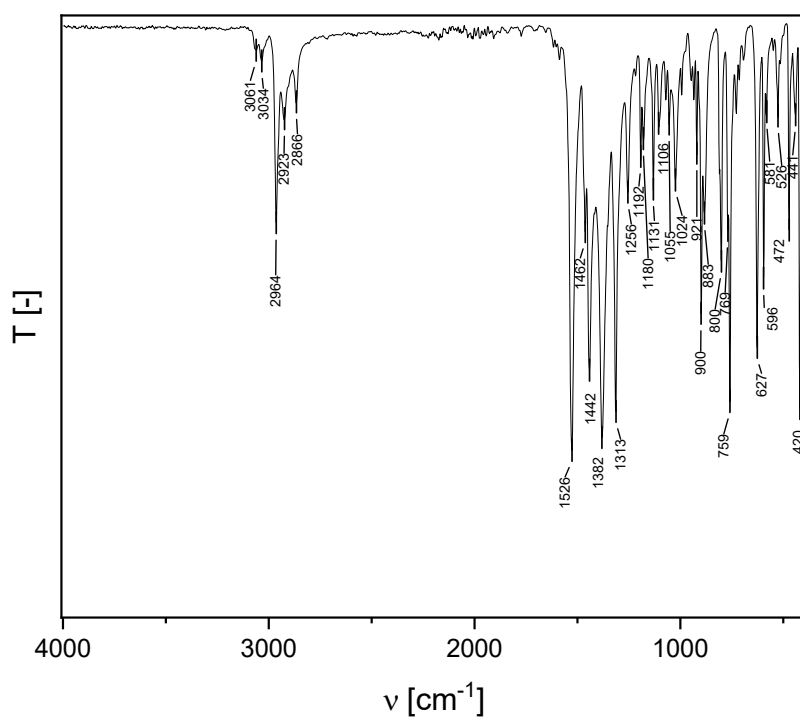

**Fig. S17.** ATR-IR spectrum of  $\text{LGa}(\text{C}_{12}\text{H}_6\text{O}_2)$  (**5**).

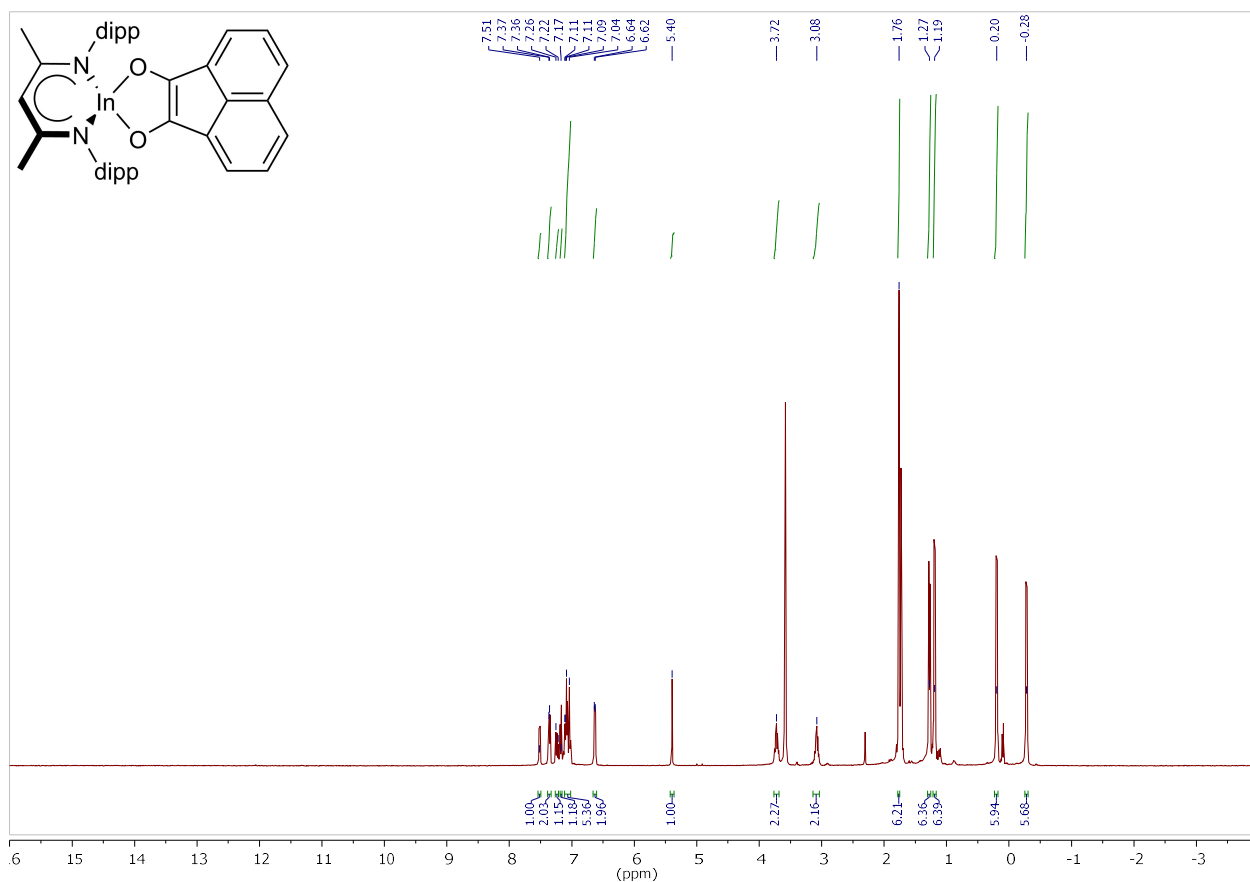

**Fig. S18.**  $^1\text{H}$  NMR spectrum (400 MHz,  $\text{thf-d}_8$ , 25 °C) of  $\text{LIn}(\text{C}_{12}\text{H}_6\text{O}_2)$  (**6**).

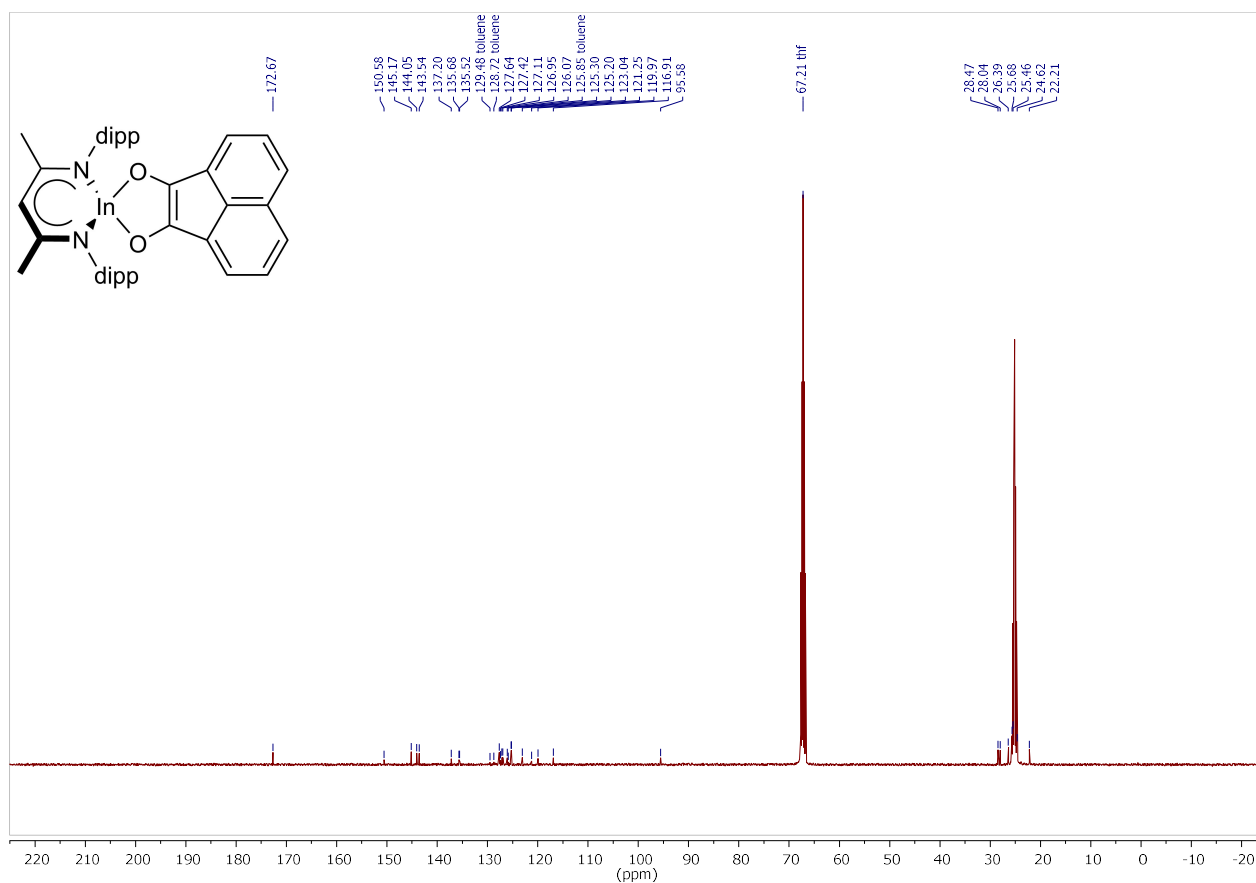

**Fig. S19.**  $^{13}\text{C}$  NMR spectrum (100.6 MHz,  $\text{thf-d}_8$ , 25 °C) of  $\text{LIn}(\text{C}_{12}\text{H}_6\text{O}_2)$  (6).

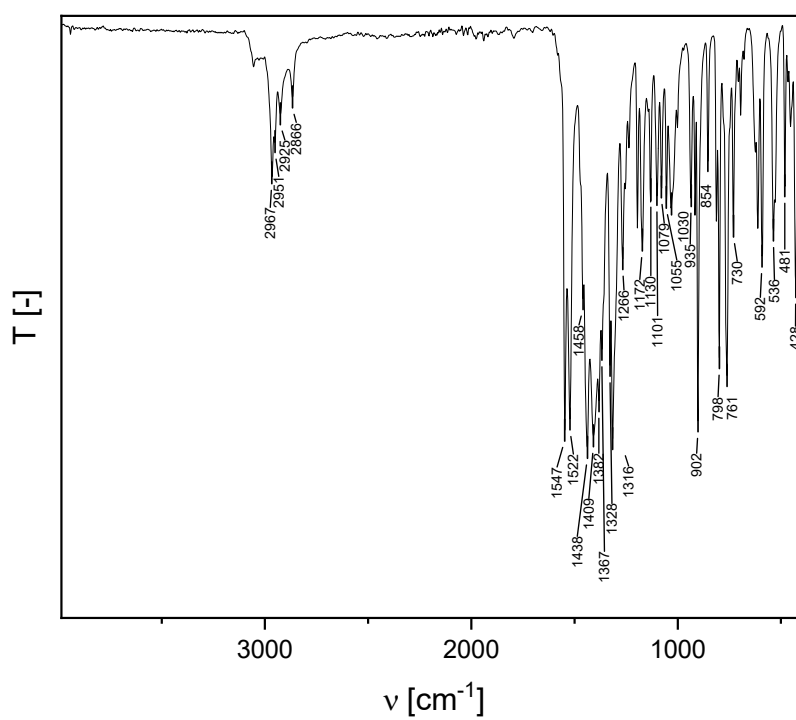

**Fig. S20.** ATR-IR spectrum of  $\text{LIn}(\text{C}_{12}\text{H}_6\text{O}_2)$  (6).

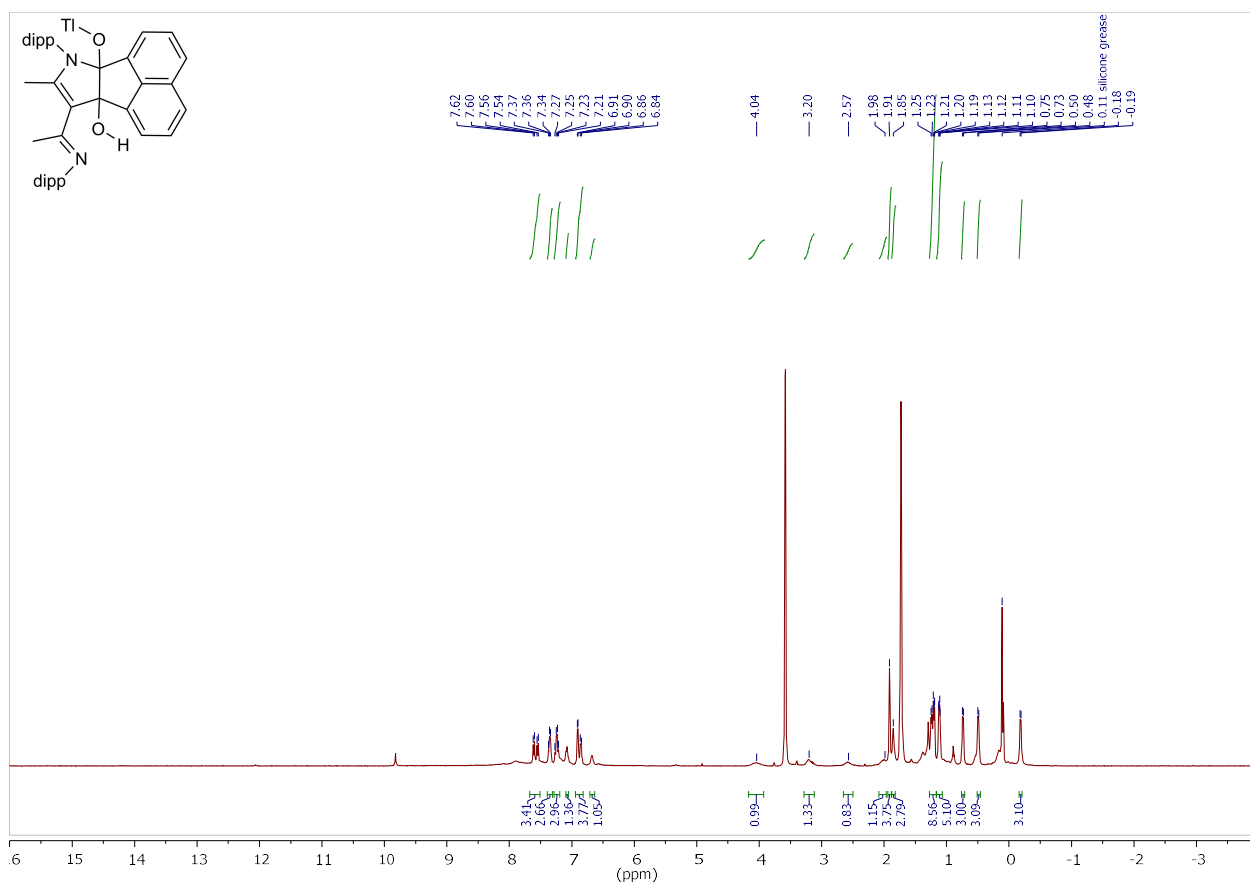

**Fig. S21.** <sup>1</sup>H NMR spectrum (400 MHz, C<sub>6</sub>D<sub>6</sub>, 25 °C) of the solid (7) obtained from the reaction of LTI with acenaphthenequinone.

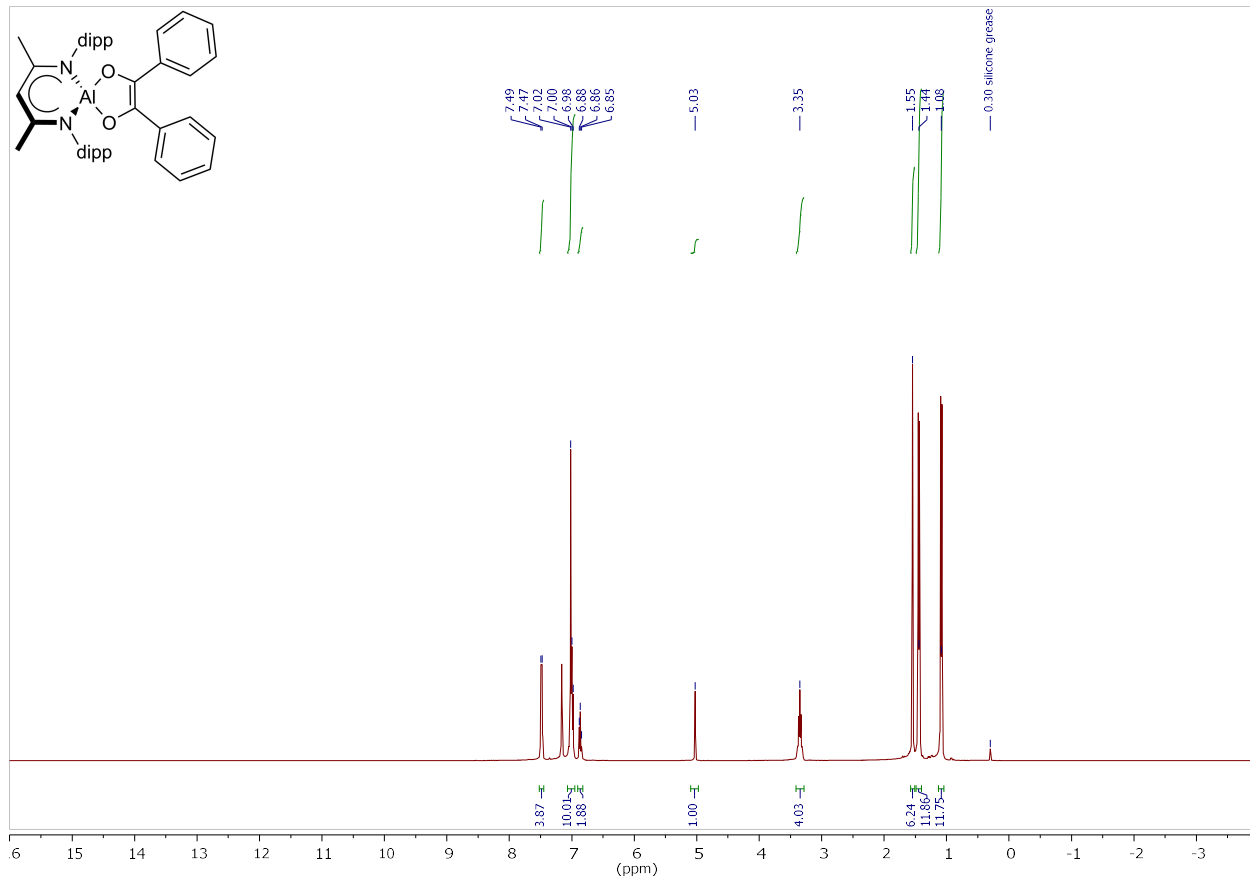

**Fig. S22.** <sup>1</sup>H NMR spectrum (400 MHz, C<sub>6</sub>D<sub>6</sub>, 25 °C) of LAI(C<sub>14</sub>H<sub>10</sub>O<sub>2</sub>) (8).

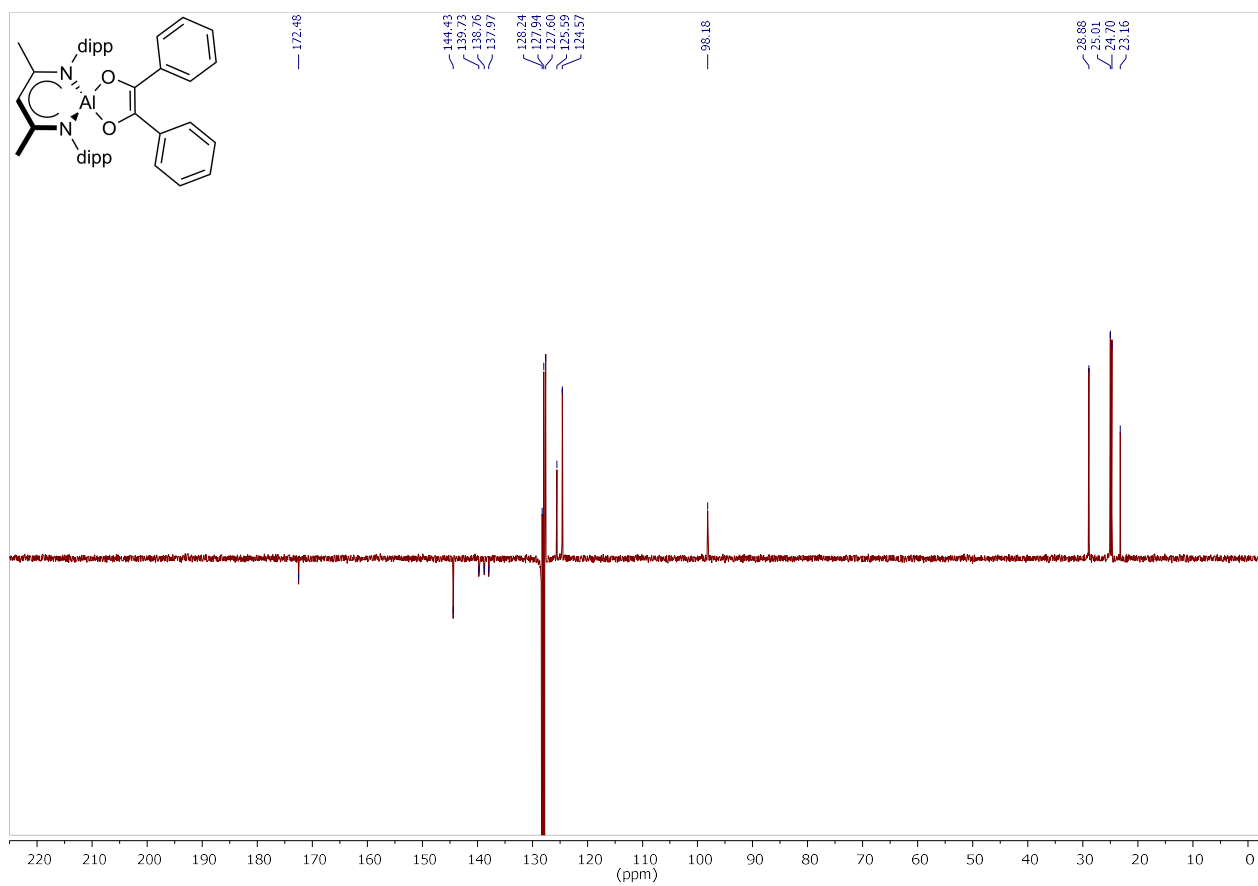

**Fig. S23.** DEPTQ  $^{13}\text{C}$  NMR spectrum (100.6 MHz,  $\text{C}_6\text{D}_6$ , 25 °C) of  $\text{LAI}(\text{C}_{14}\text{H}_{10}\text{O}_2)$  (8).

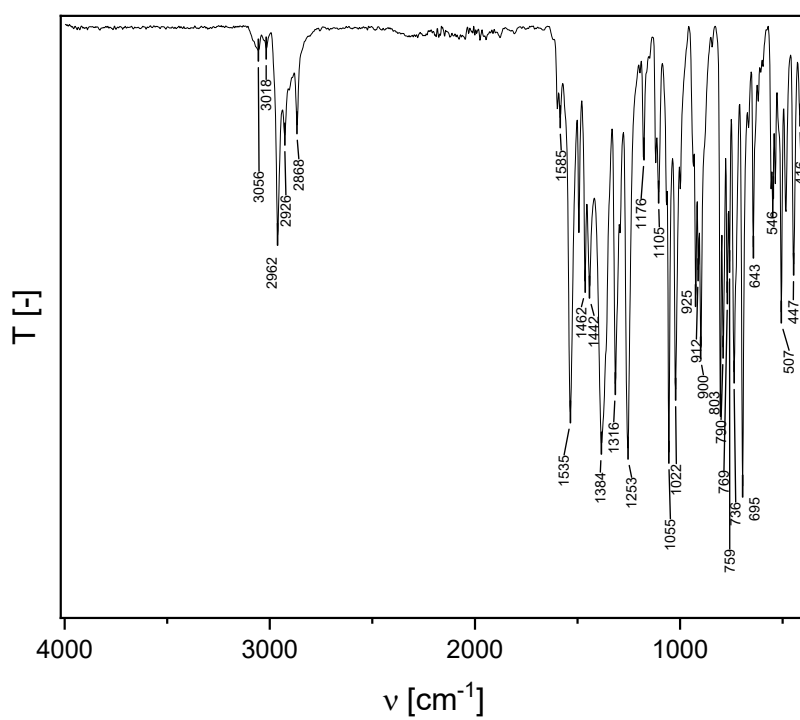

**Fig. S24.** ATR-IR spectrum of  $\text{LAI}(\text{C}_{14}\text{H}_{10}\text{O}_2)$  (8).

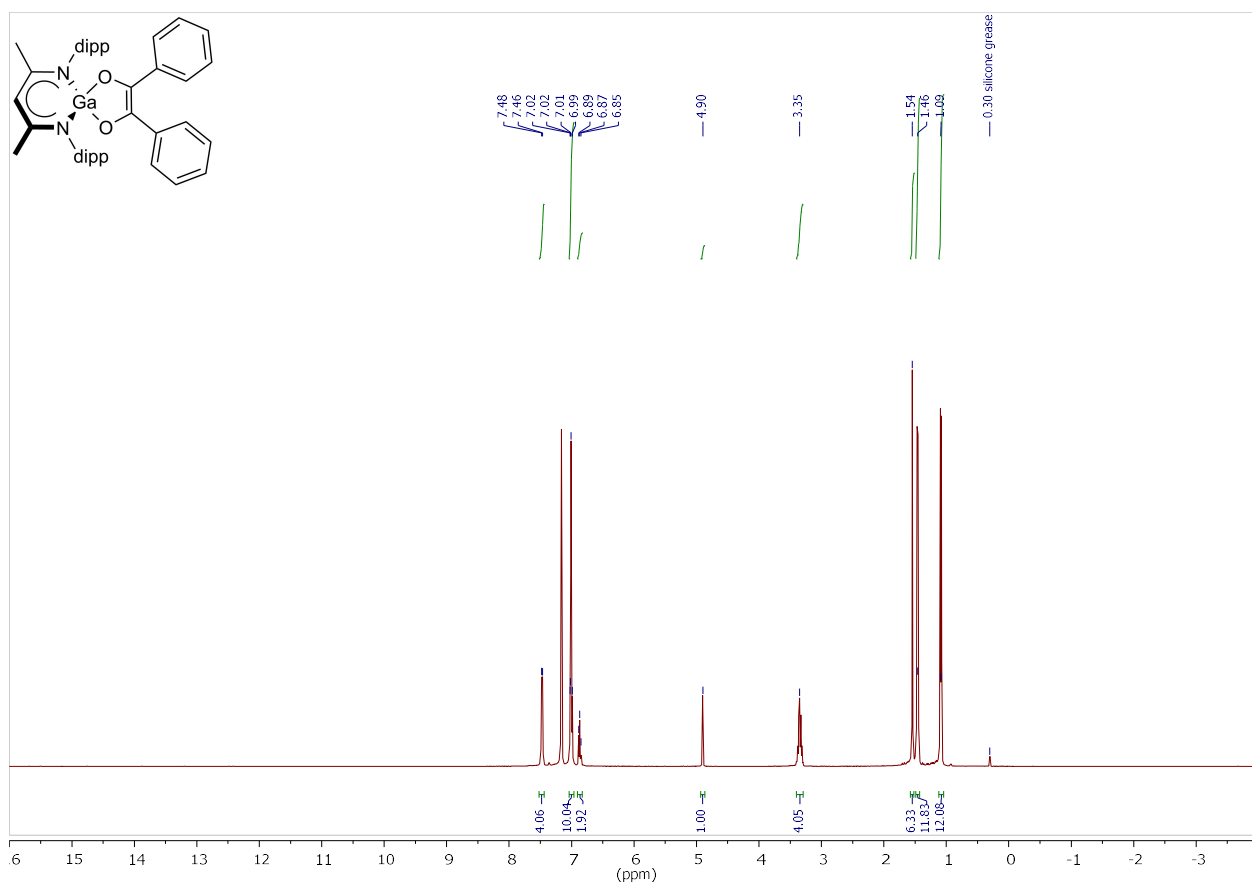

**Fig. S25.** <sup>1</sup>H NMR spectrum (400 MHz, C<sub>6</sub>D<sub>6</sub>, 25 °C) of LGa(C<sub>14</sub>H<sub>10</sub>O<sub>2</sub>) (9).

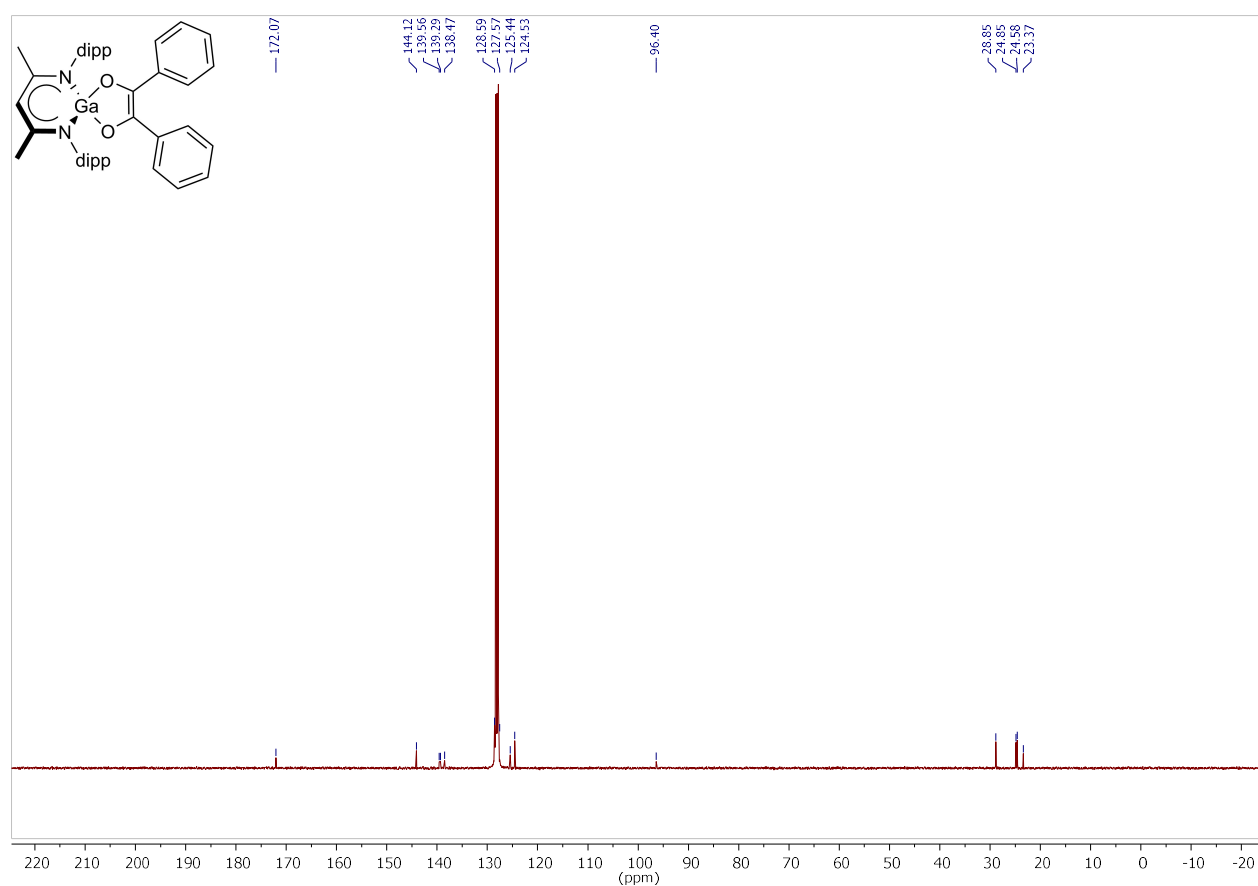

**Fig. S26.** <sup>13</sup>C NMR spectrum (100.6 MHz, C<sub>6</sub>D<sub>6</sub>, 25 °C) of LGa(C<sub>14</sub>H<sub>10</sub>O<sub>2</sub>) (9).

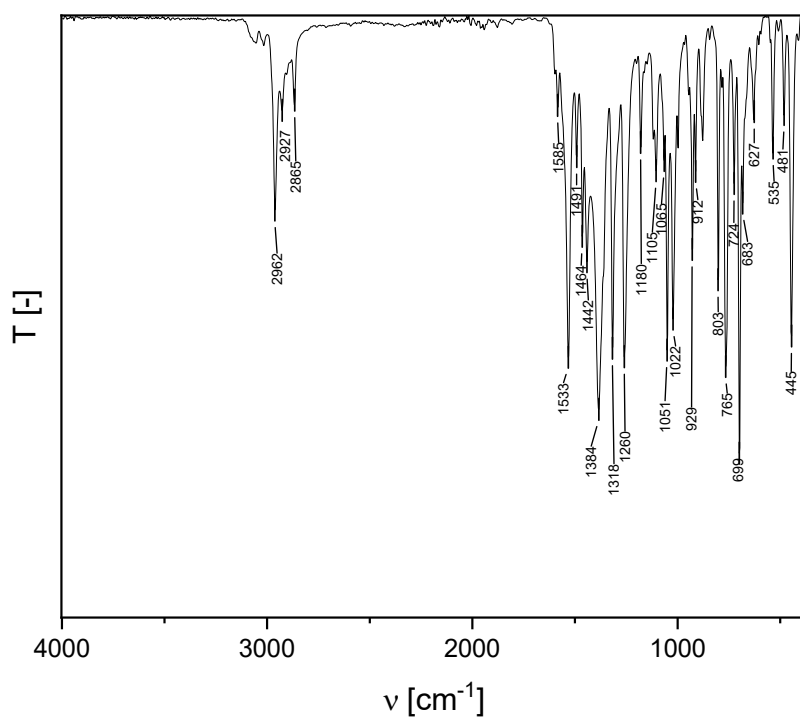

**Fig. S27.** ATR-IR spectrum of  $\text{LGa}(\text{C}_{14}\text{H}_{10}\text{O}_2)$  (**9**).

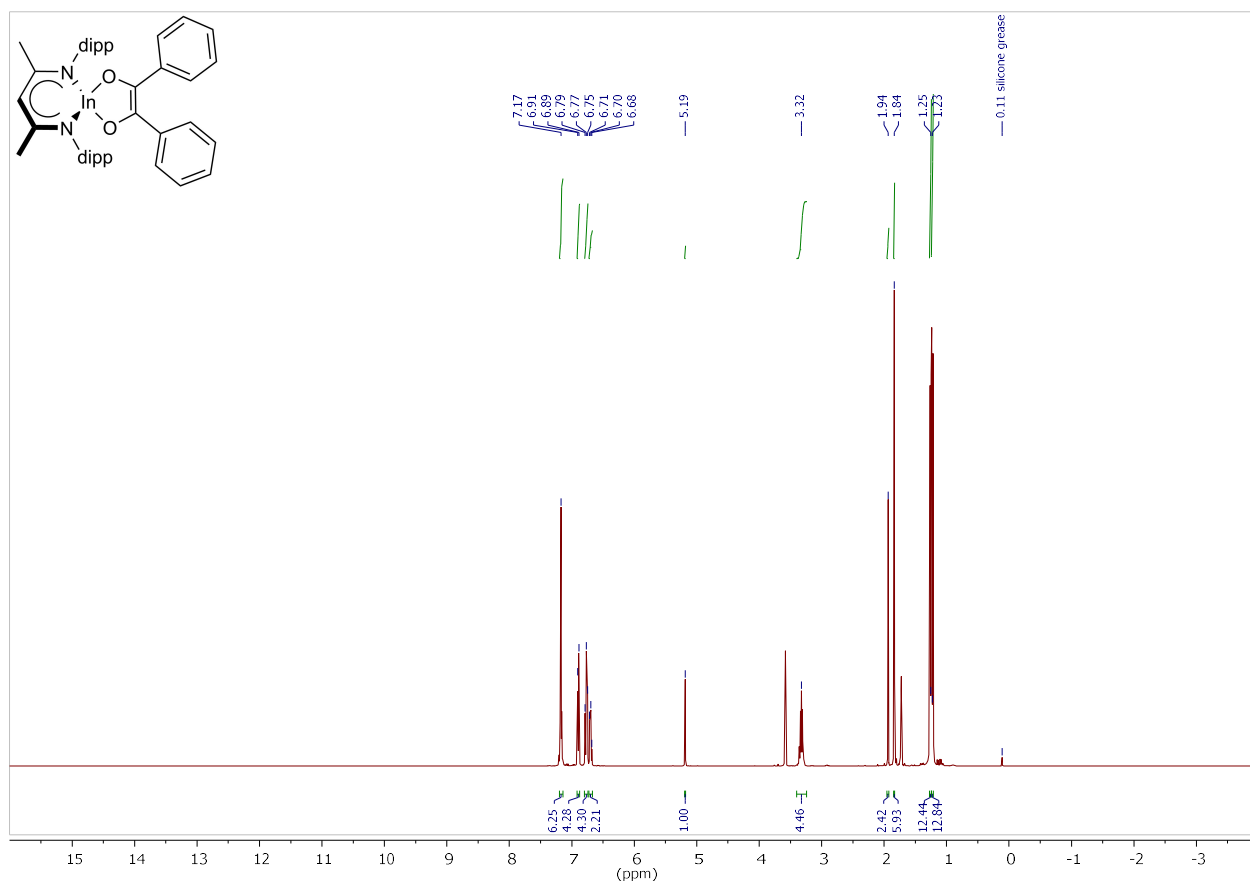

**Fig. S28.**  $^1\text{H}$  NMR spectrum (400 MHz,  $\text{thf-d}_8$ , 25 °C) of  $\text{LIn}(\text{C}_{14}\text{H}_{10}\text{O}_2) \cdot \text{MeCN}$  (**10**).

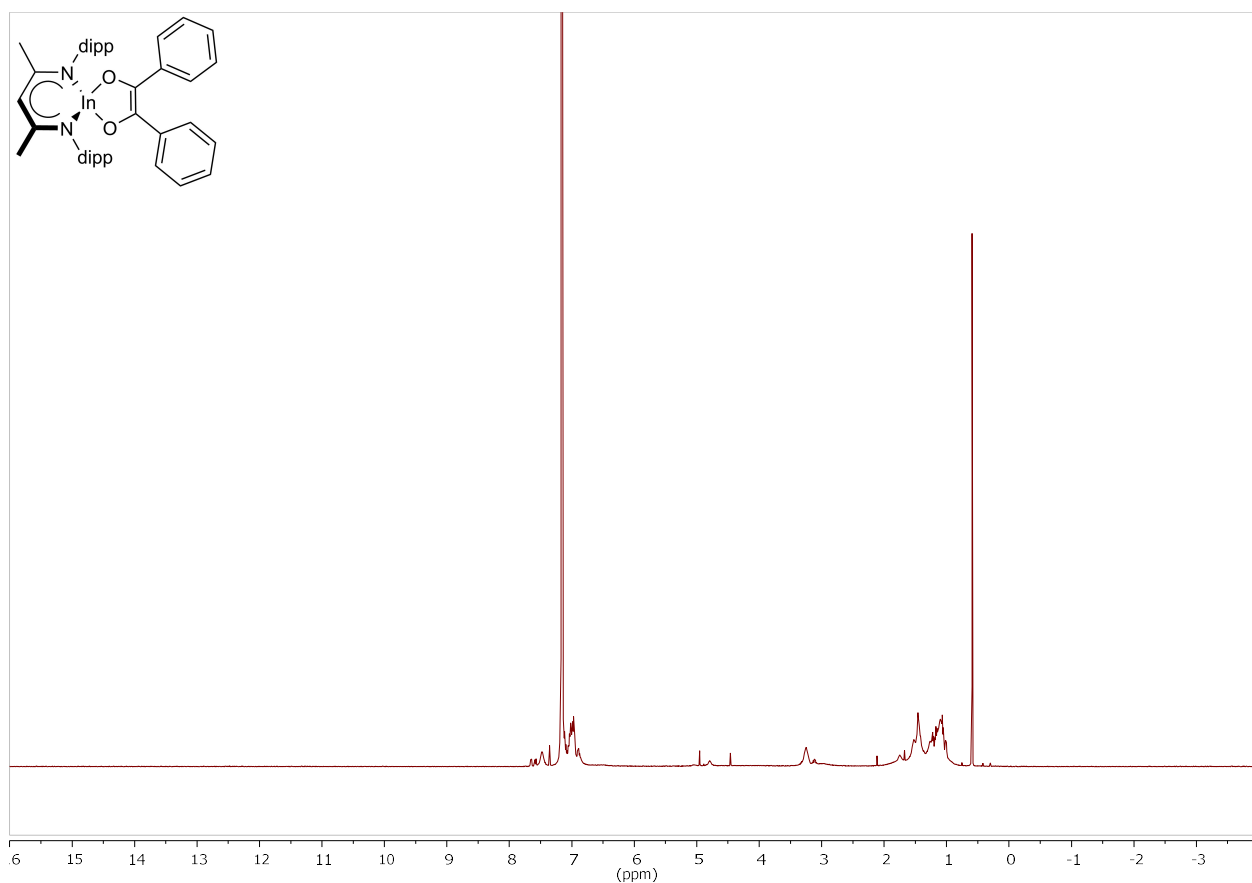

**Fig. S29.**  $^1\text{H}$  NMR spectrum (400 MHz,  $\text{C}_6\text{D}_6$ , 25 °C) of  $\text{LIn}(\text{C}_{14}\text{H}_{10}\text{O}_2) \cdot \text{MeCN}$  (10).

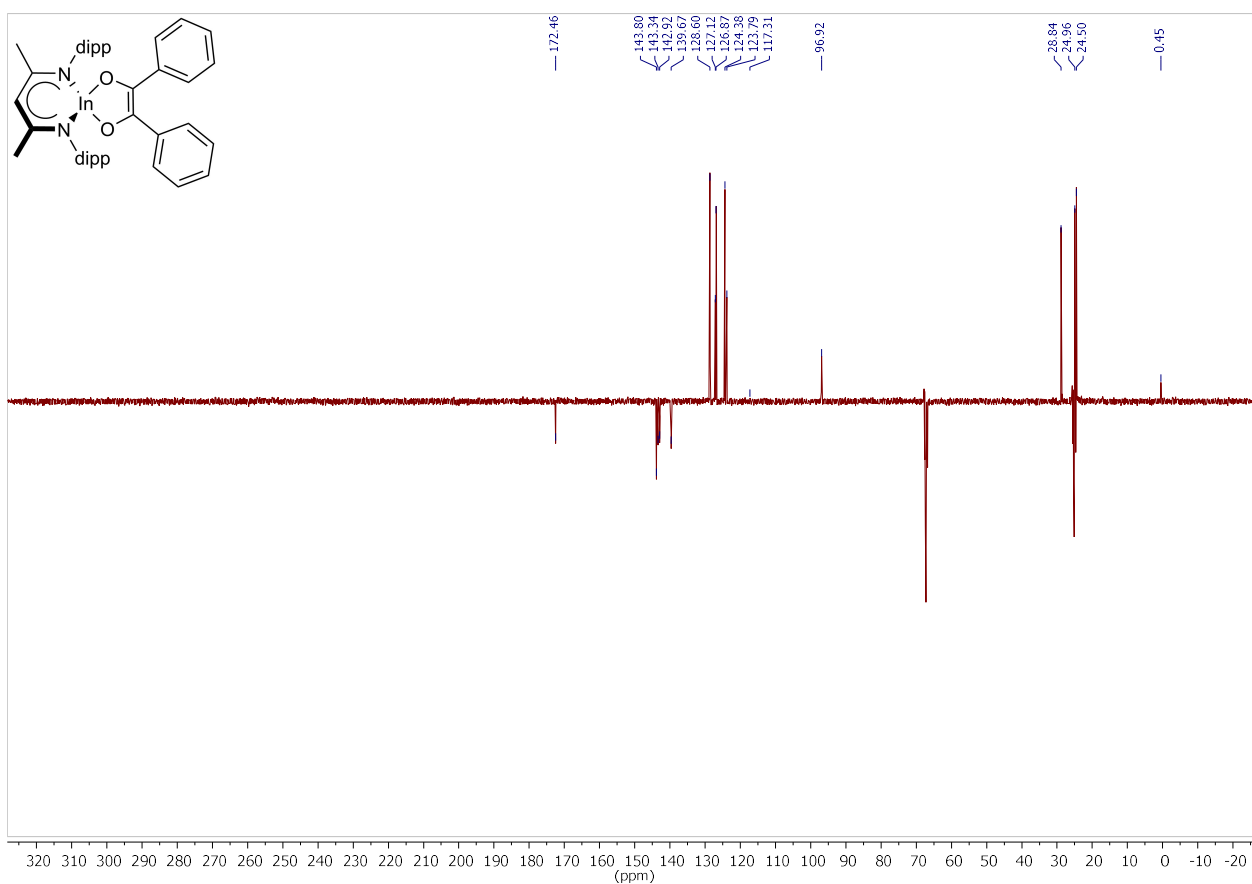

**Fig. S30.** DEPTQ  $^{13}\text{C}$  NMR spectrum (400 MHz,  $\text{thf-d}_8$ , 25 °C) of  $\text{LIn}(\text{C}_{14}\text{H}_{10}\text{O}_2) \cdot \text{MeCN}$  (10).

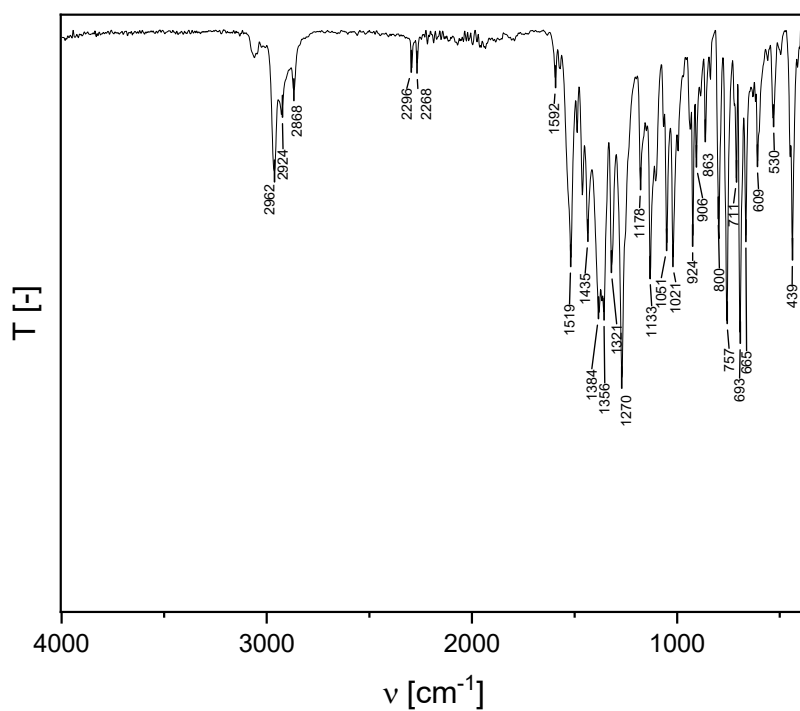

**Fig. S31.** ATR-IR spectrum of  $\text{LIn}(\text{C}_{14}\text{H}_{10}\text{O}_2) \text{MeCN}$  (**10**).

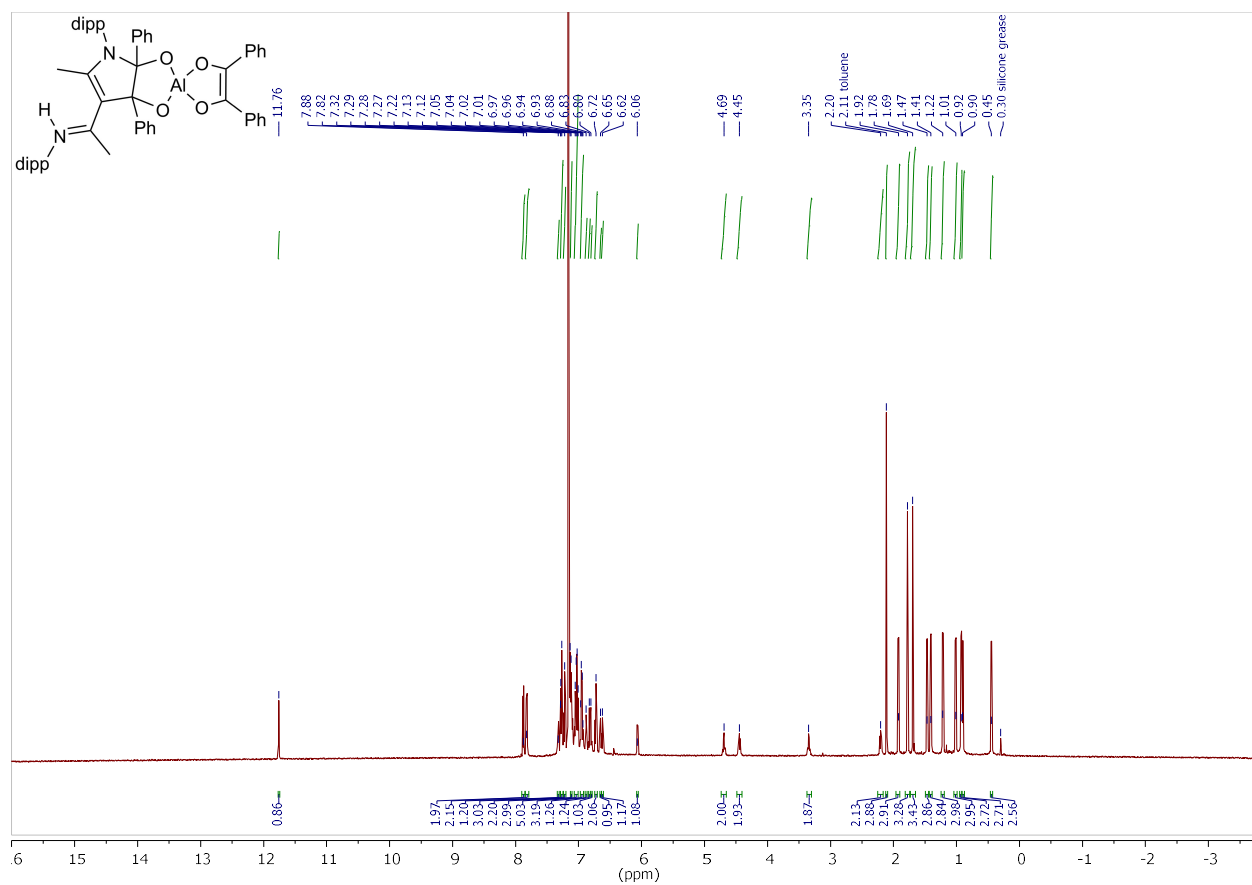

**Fig. S32.**  $^1\text{H}$  NMR spectrum (400 MHz,  $\text{C}_6\text{D}_6$ , 25 °C) of  $\text{LAl}(\text{C}_{14}\text{H}_{10}\text{O}_2)_2$  (**11**).

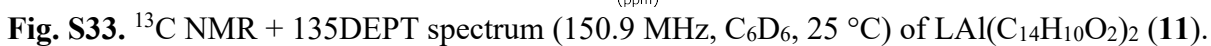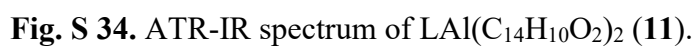

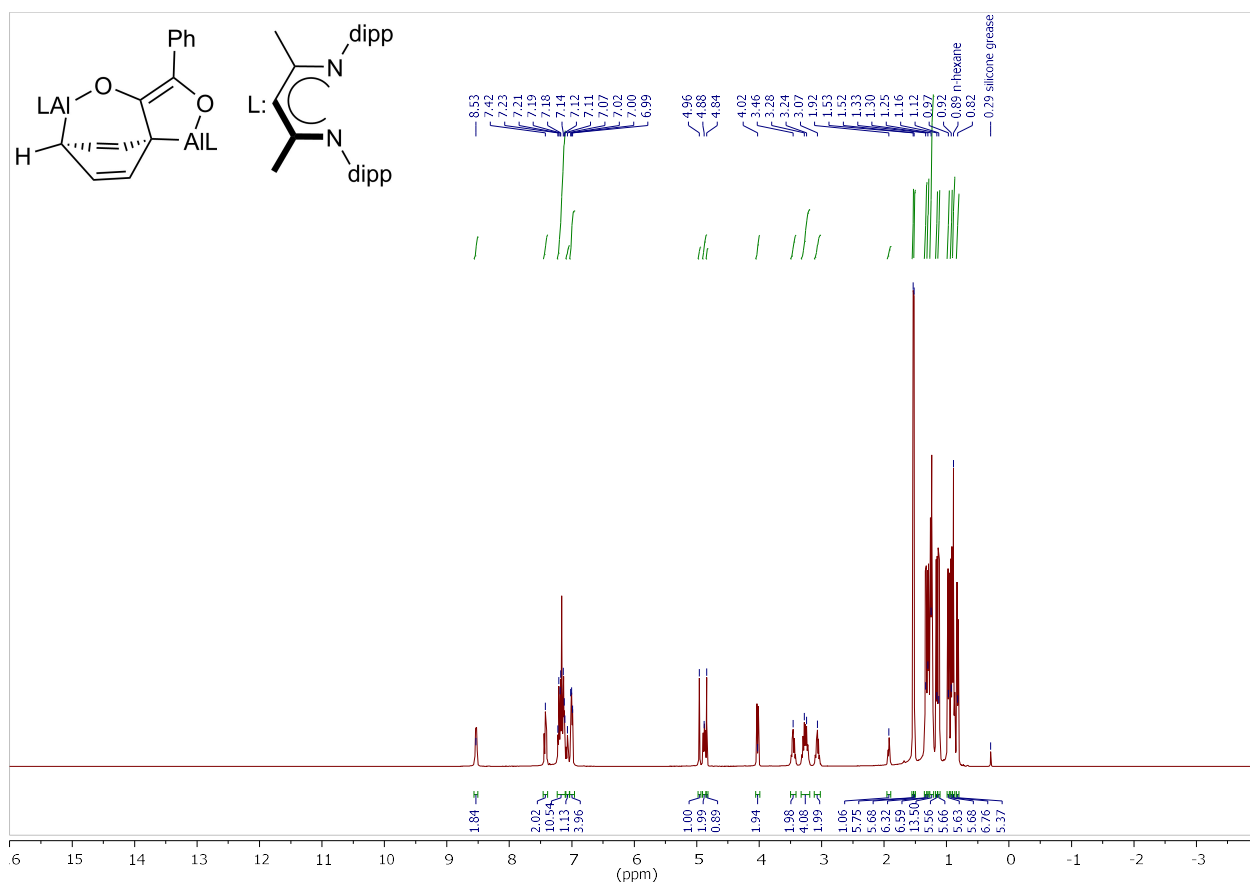

**Fig. S35.** <sup>1</sup>H NMR spectrum (400 MHz, C<sub>6</sub>D<sub>6</sub>, 25 °C) of (LAl)<sub>2</sub>(C<sub>14</sub>H<sub>10</sub>O<sub>2</sub>) (12).

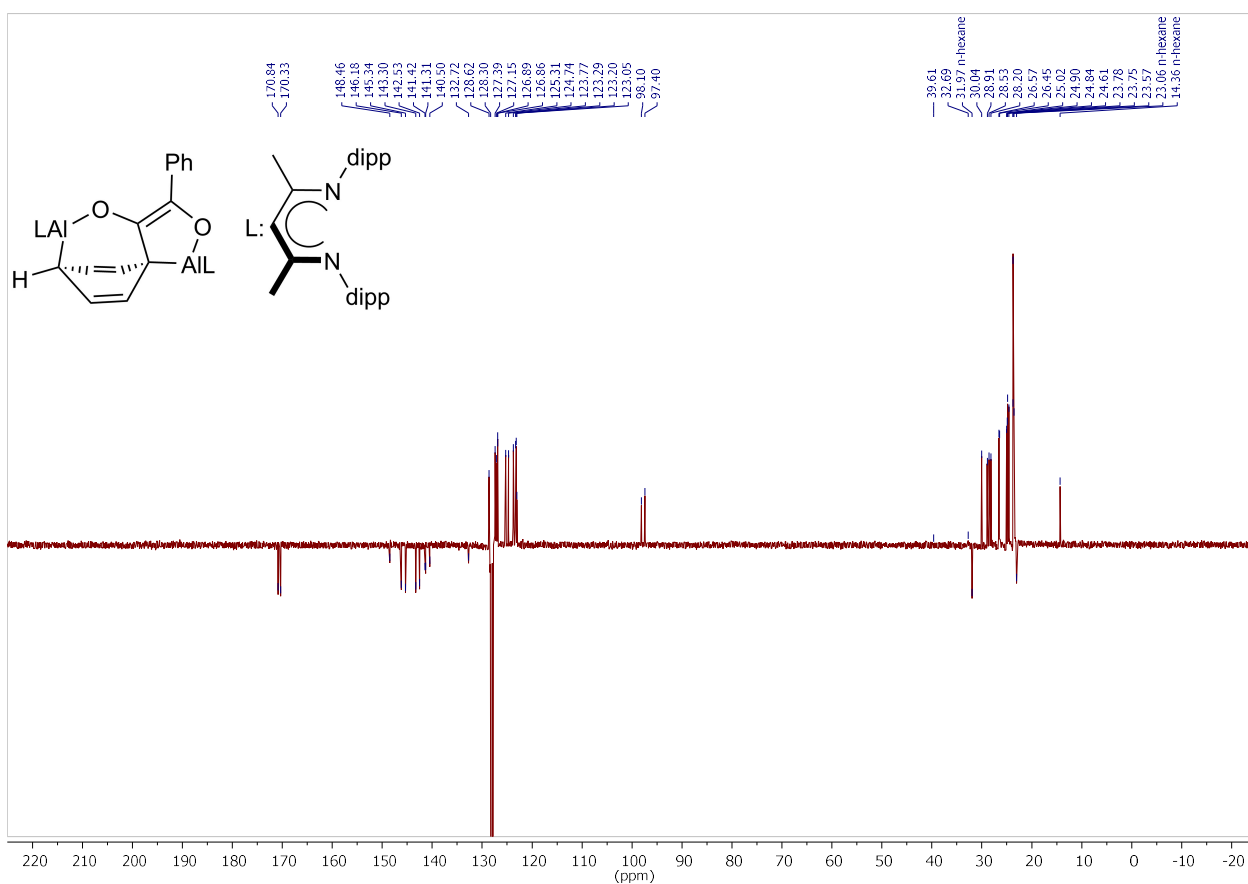

**Fig. S36.** DEPTQ <sup>13</sup>C NMR spectrum (100.6 MHz, C<sub>6</sub>D<sub>6</sub>, 25 °C) of (LAl)<sub>2</sub>(C<sub>14</sub>H<sub>10</sub>O<sub>2</sub>) (12).

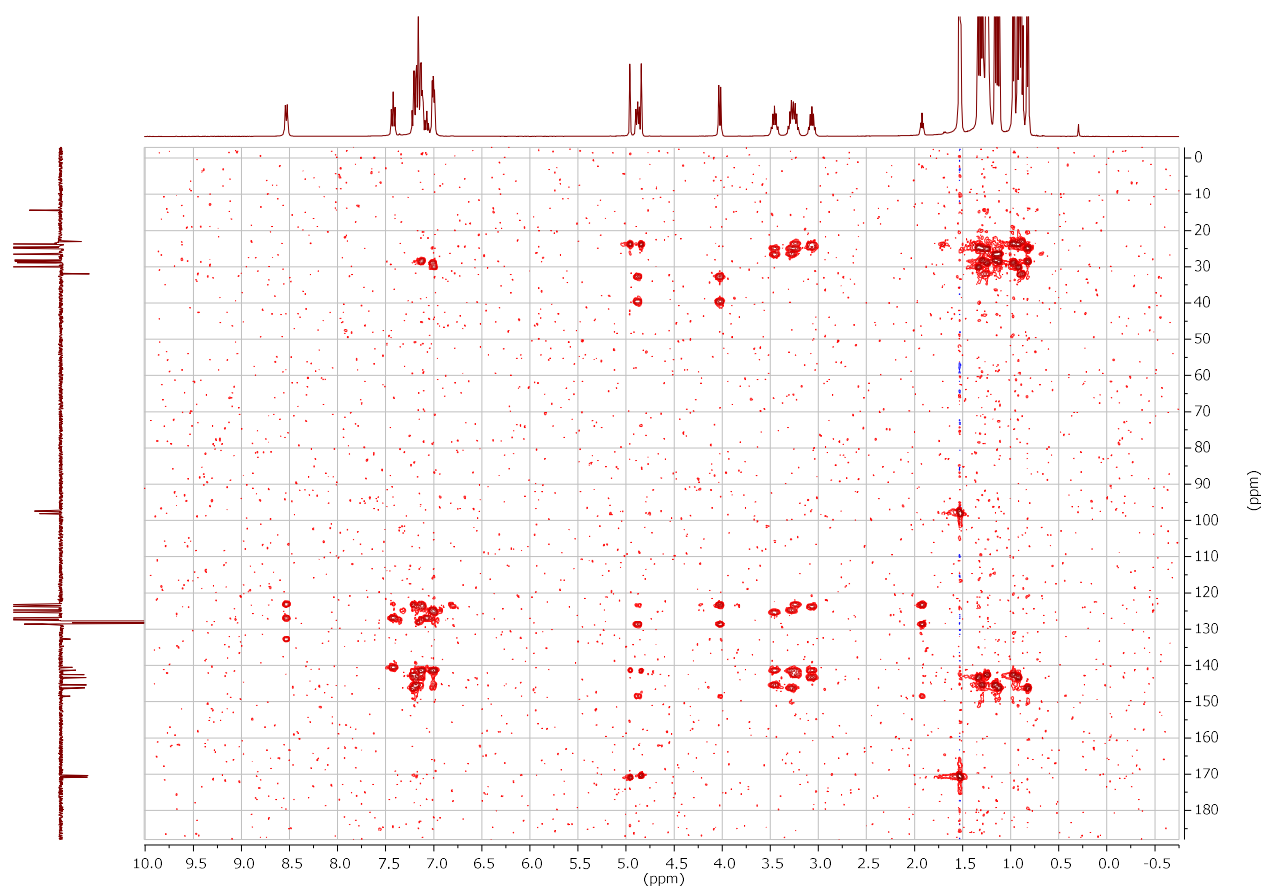

**Fig. S37.** HMBC spectrum (400/100.6 MHz,  $C_6D_6$ , 25 °C) of  $(LAl)_2(C_{14}H_{10}O_2)$  (**12**).

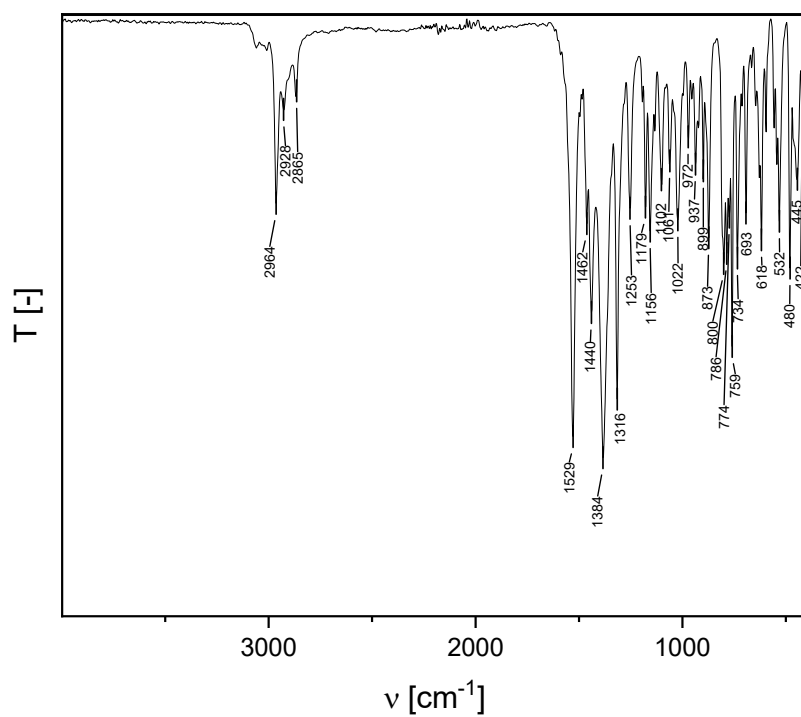

**Fig. S38.** ATR-IR spectrum of  $(LAl)_2(C_{14}H_{10}O_2)$  (**12**).

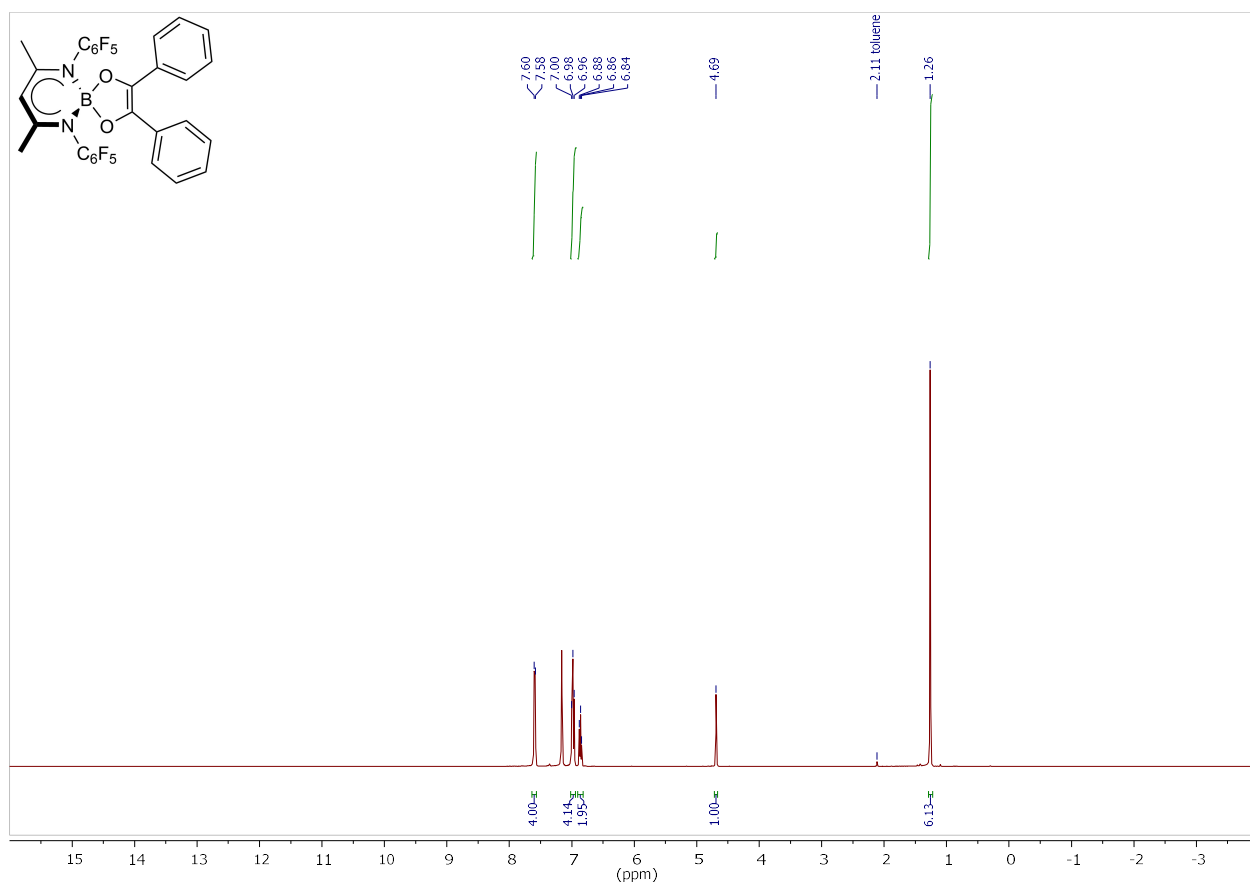

**Fig. S39.** <sup>1</sup>H NMR spectrum (400 MHz, C<sub>6</sub>D<sub>6</sub>, 25 °C) of L'B(C<sub>14</sub>H<sub>10</sub>O<sub>2</sub>) (**13**).

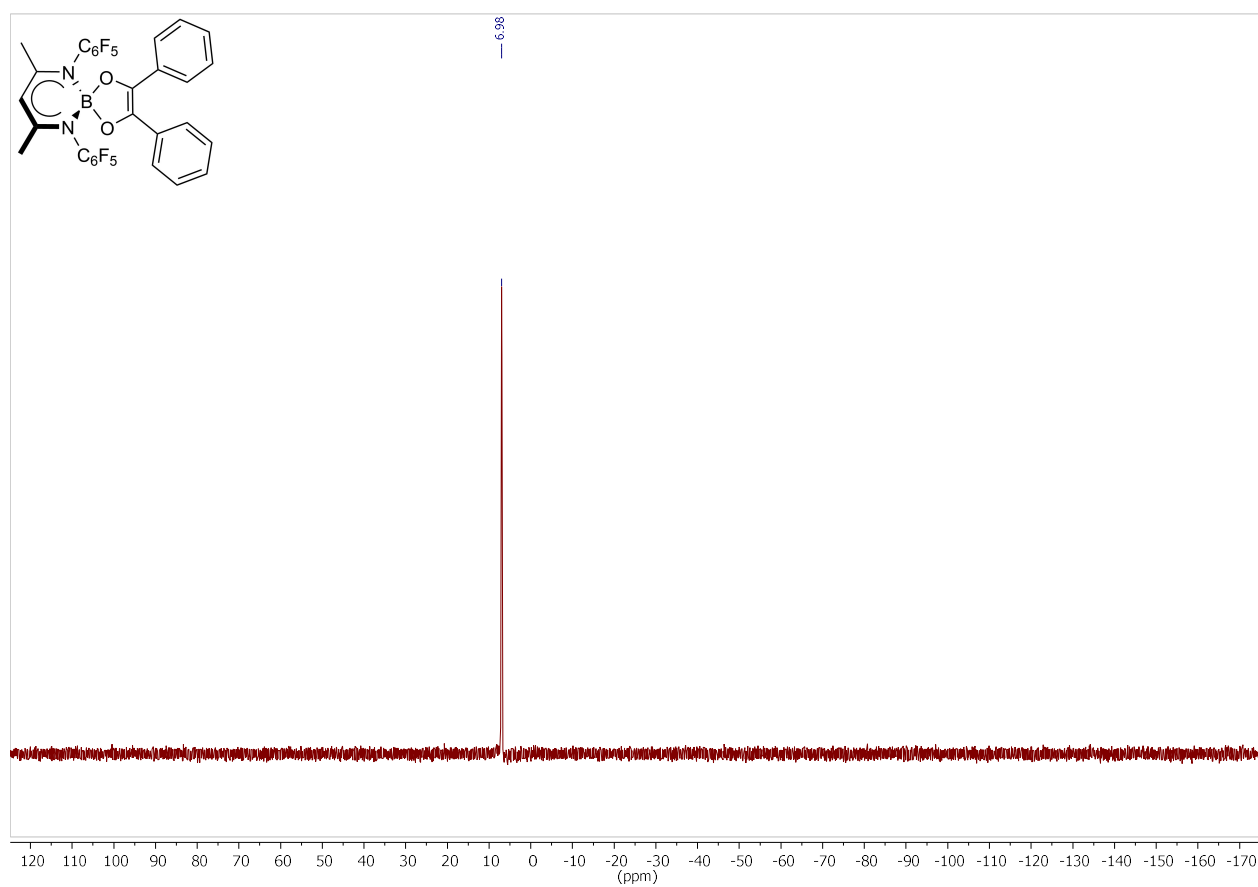

**Fig. S40.** <sup>11</sup>B NMR spectrum (128.4 MHz, C<sub>6</sub>D<sub>6</sub>, 25 °C) of L'B(C<sub>14</sub>H<sub>10</sub>O<sub>2</sub>) (**13**).

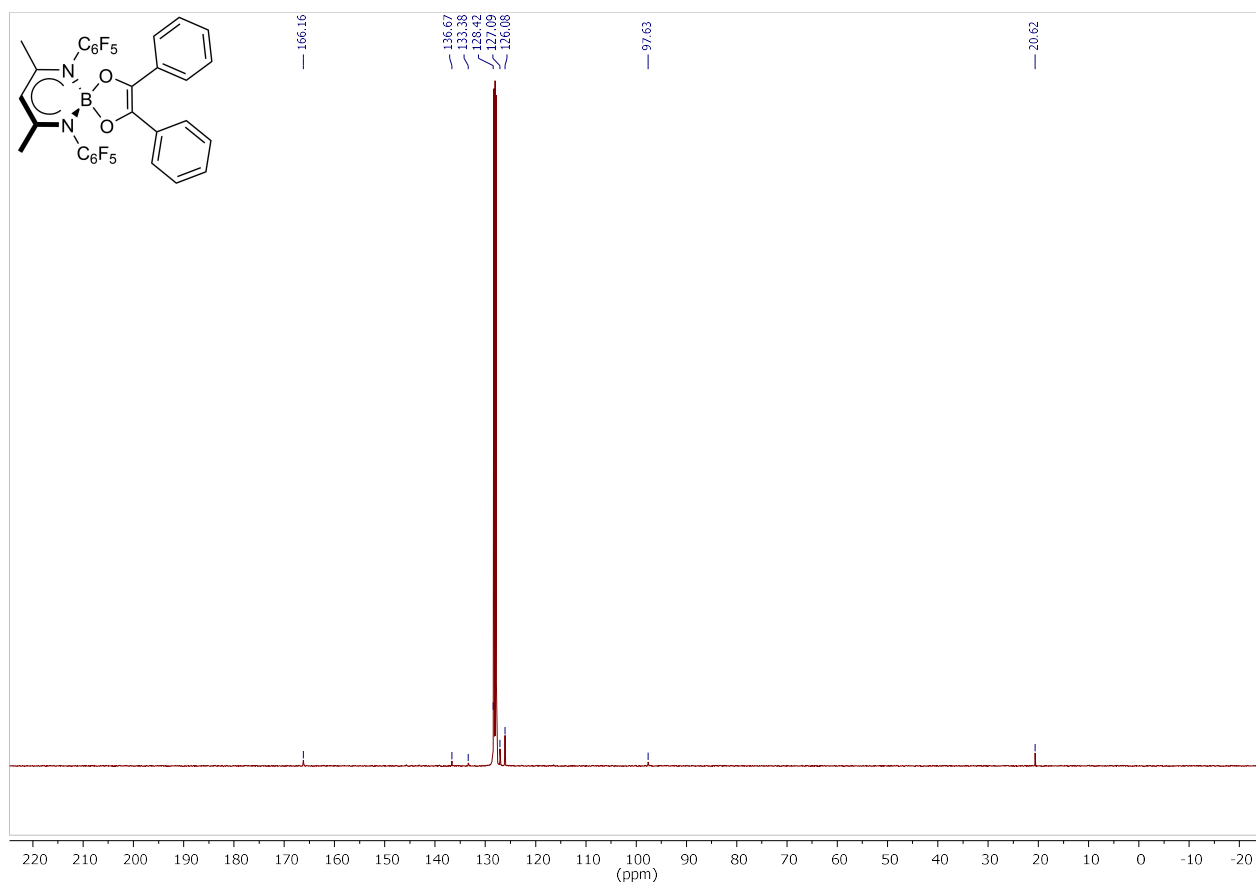

**Fig. S41.**  $^{13}\text{C}$  NMR spectrum (100.6 MHz,  $\text{C}_6\text{D}_6$ , 25 °C) of  $\text{L}'\text{B}(\text{C}_{14}\text{H}_{10}\text{O}_2)$  (**13**).

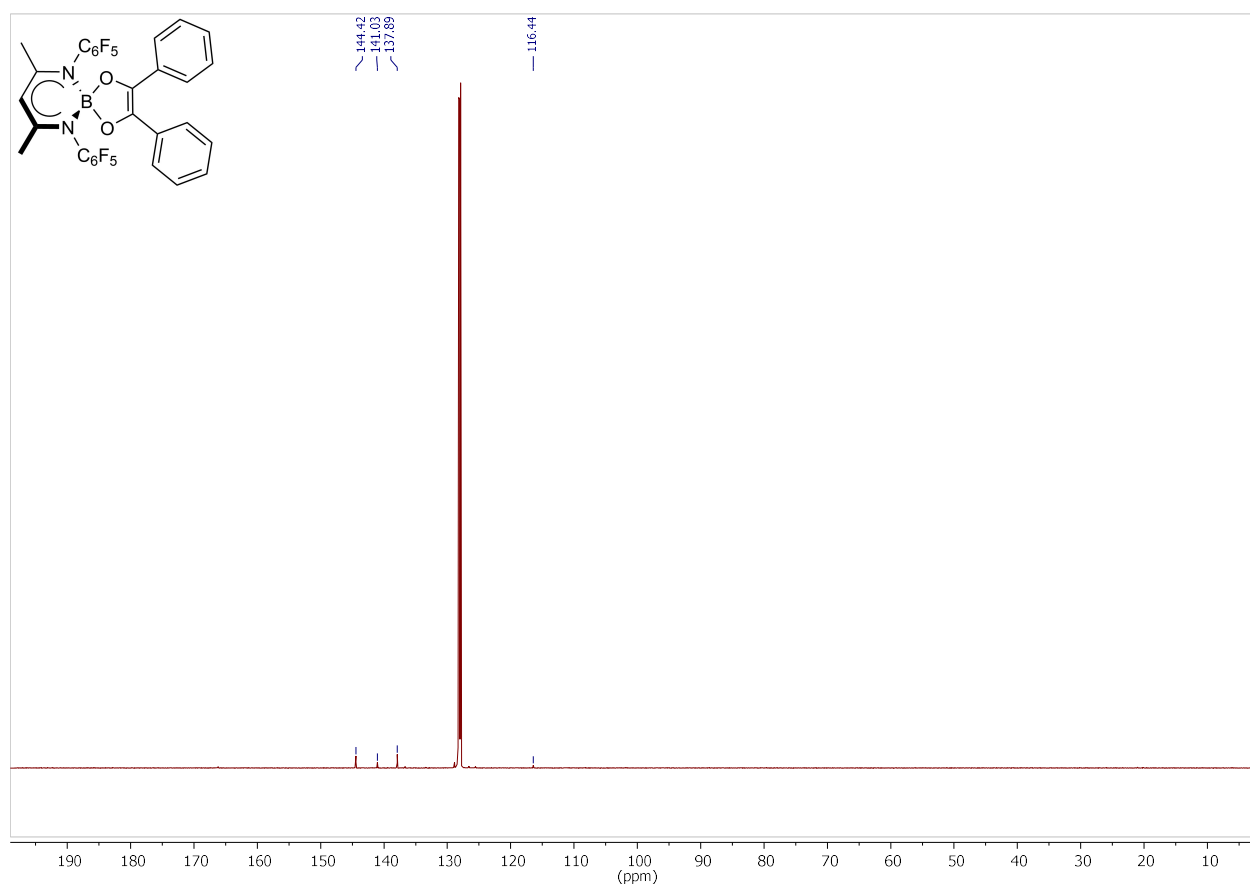

**Fig. S42.**  $^{13}\text{C}$   $\{^{19}\text{F}\}$  NMR spectrum (150.9 MHz,  $\text{C}_6\text{D}_6$ , 25 °C) of  $\text{L}'\text{B}(\text{C}_{14}\text{H}_{10}\text{O}_2)$  (**13**).

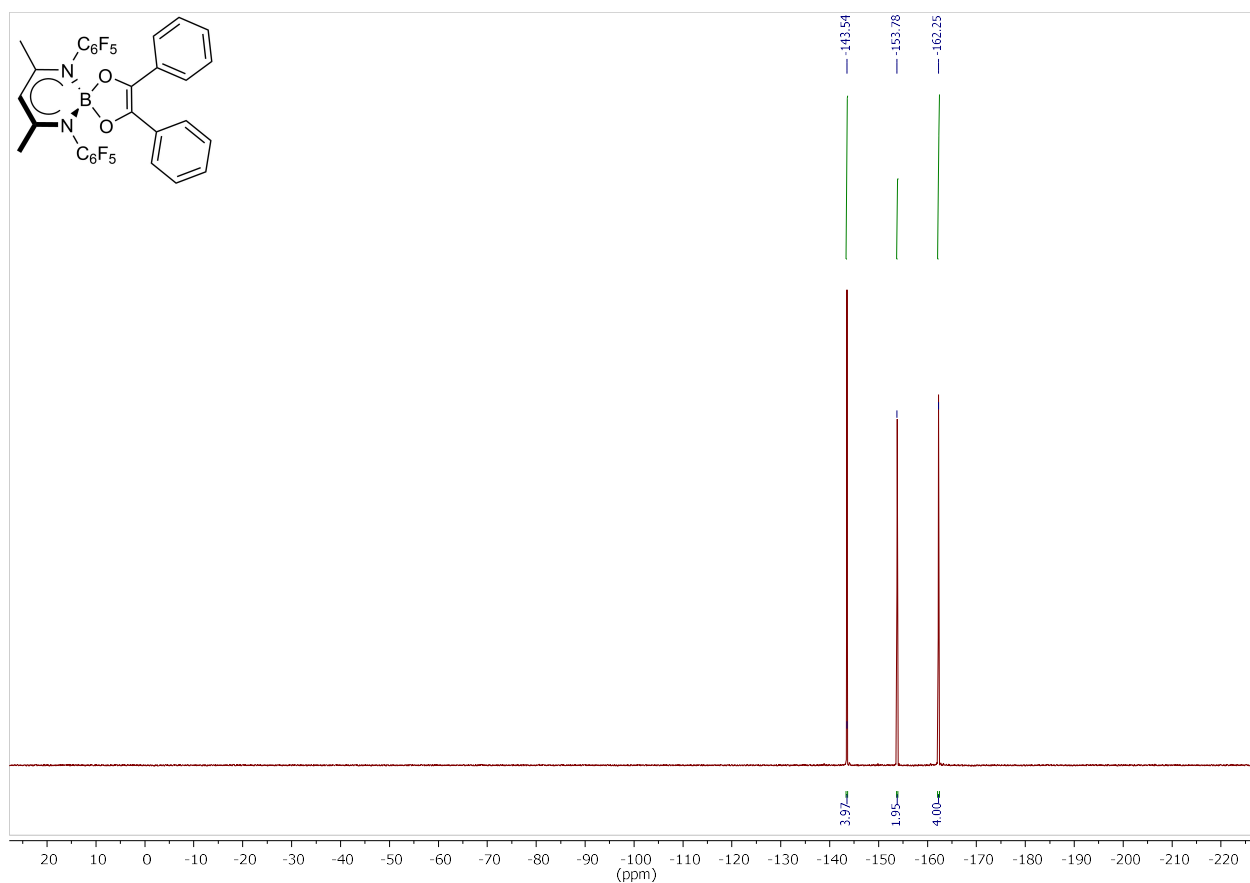

**Fig. S43.**  $^{19}F$  NMR spectrum (376.5 MHz,  $C_6D_6$ , 25 °C) of  $L'B(C_{14}H_{10}O_2)$  (**13**).

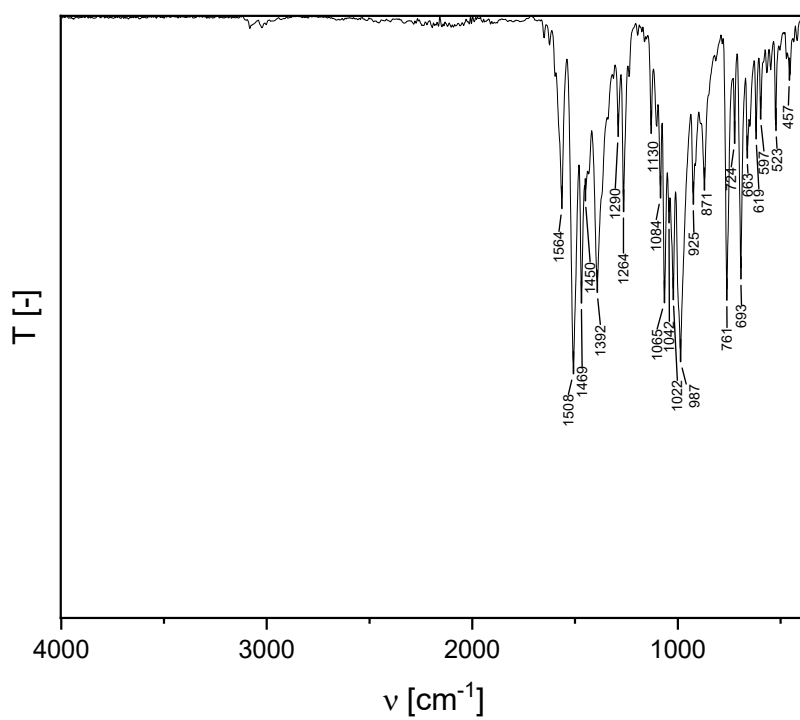

**Fig. S44.** ATR-IR spectrum of  $L'B(C_{14}H_{10}O_2)$  (**13**).

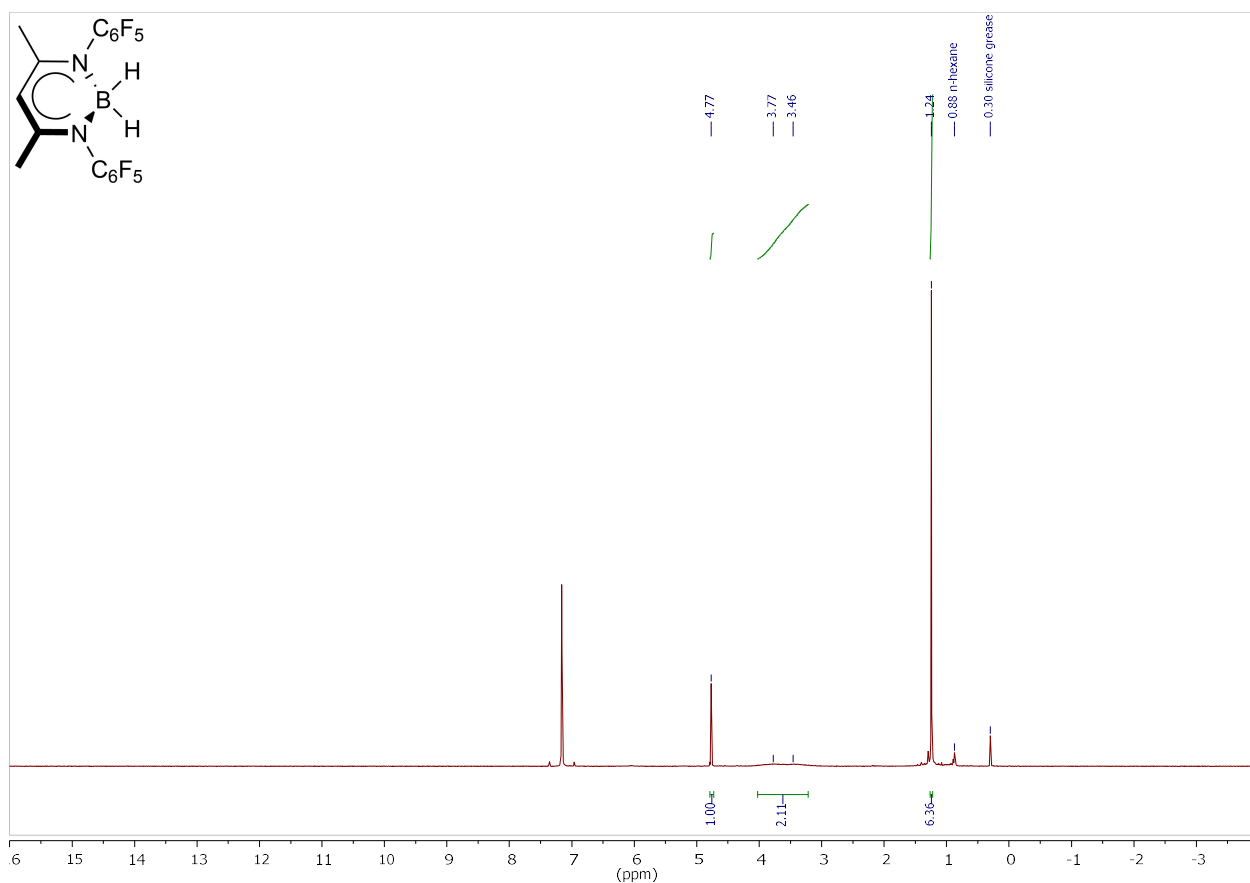

**Fig. S45.** <sup>1</sup>H NMR spectrum (400 MHz, C<sub>6</sub>D<sub>6</sub>, 25 °C) of L'BH<sub>2</sub> (**14**).

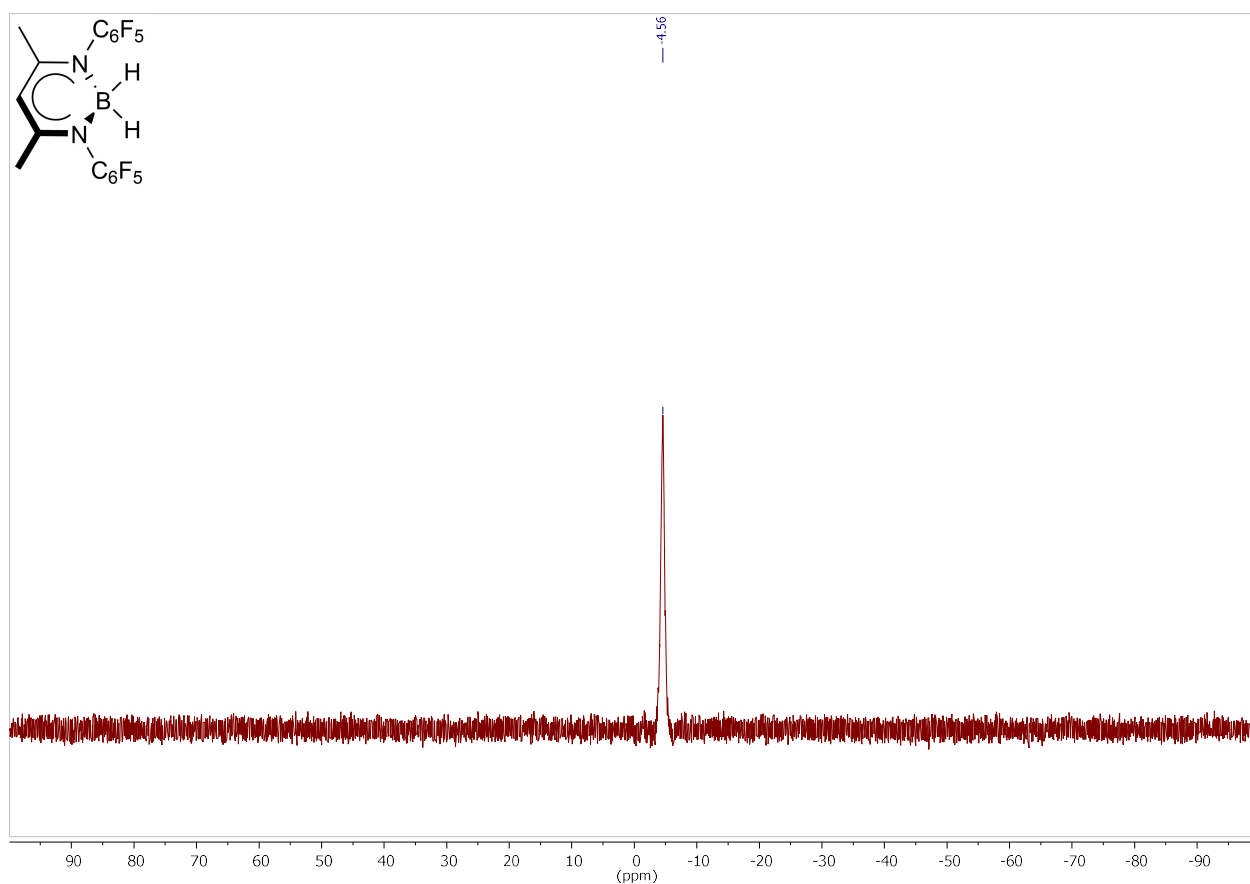

**Fig. S46.** <sup>11</sup>B NMR spectrum (192.5 MHz, C<sub>6</sub>D<sub>6</sub>, 25 °C) of L'BH<sub>2</sub> (**14**).

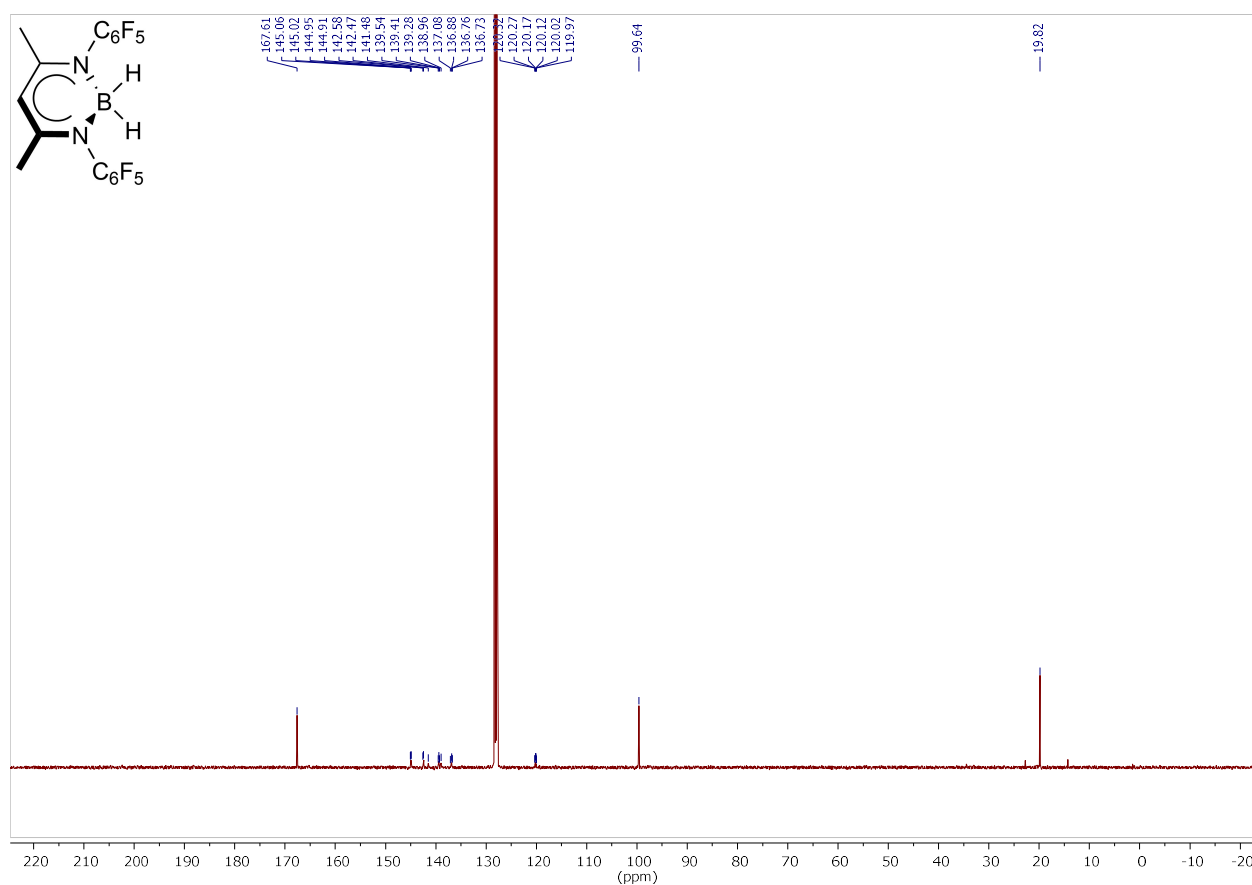

**Fig. S47.** <sup>13</sup>C NMR spectrum (100.6 MHz, C<sub>6</sub>D<sub>6</sub>, 25 °C) of L'BH<sub>2</sub> (**14**).

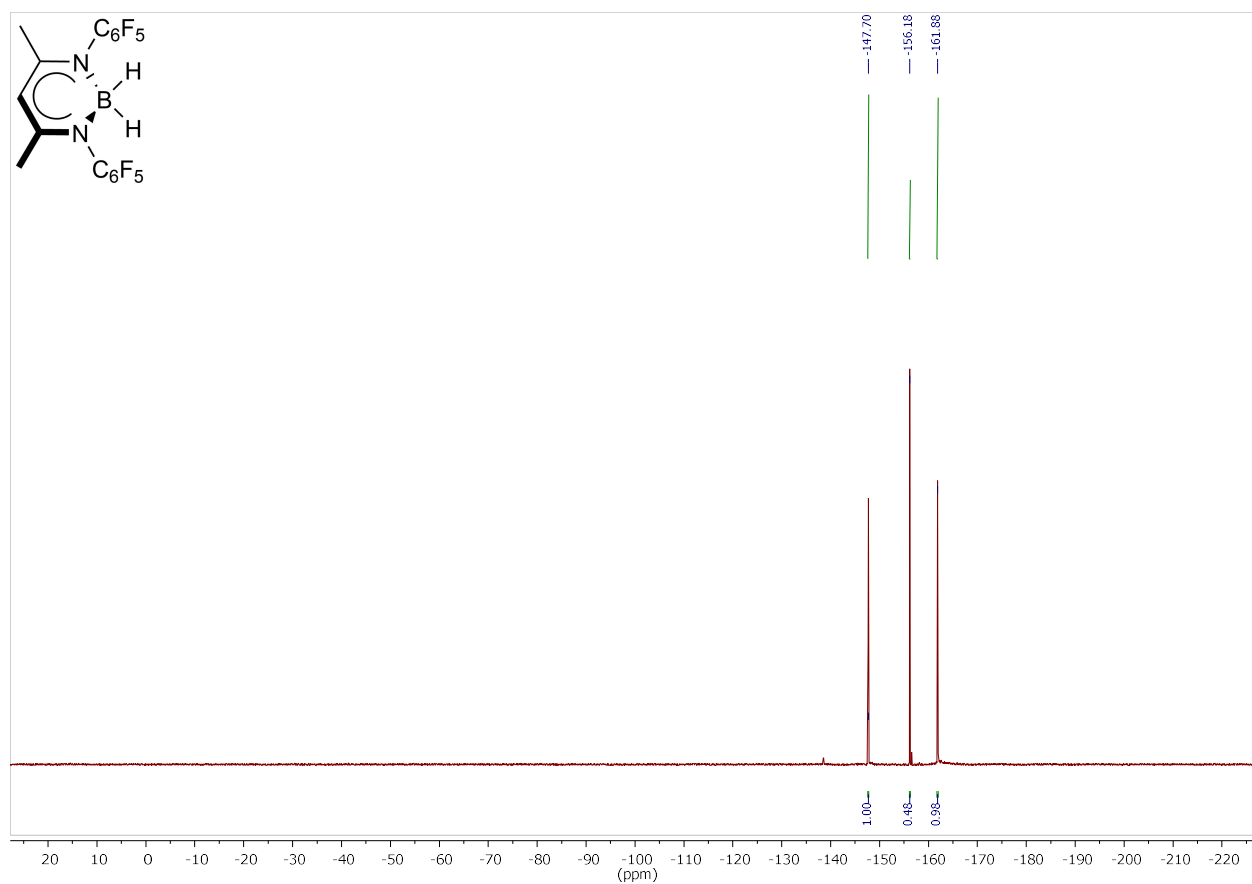

**Fig. S48.** <sup>19</sup>F NMR spectrum (376.5 MHz, C<sub>6</sub>D<sub>6</sub>, 25 °C) of L'BH<sub>2</sub> (**14**).

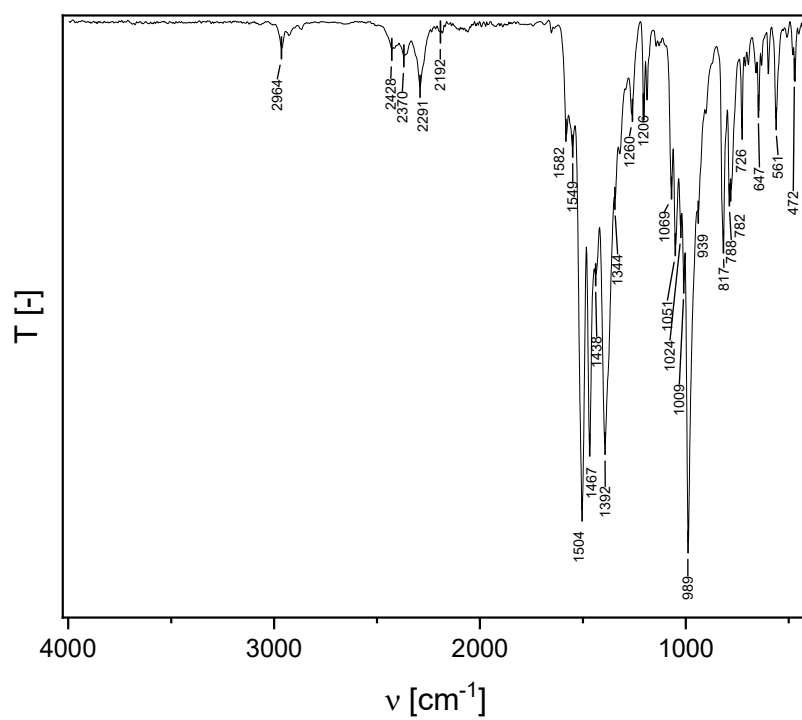

**Fig. S49.** ATR-IR spectrum of L'BH<sub>2</sub> (14).

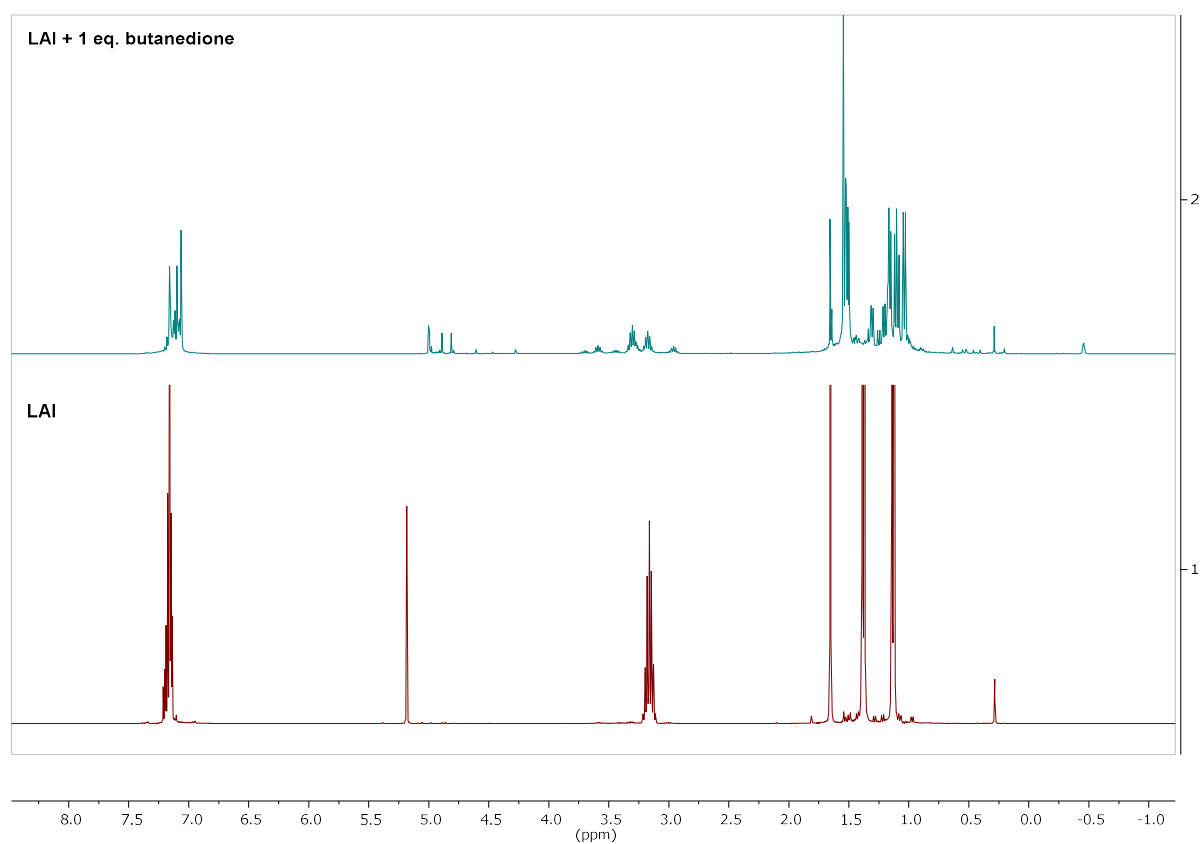

**Fig. S50.** Reaction of LAI with one equivalent of butanedione. Bottom: LAI before addition.

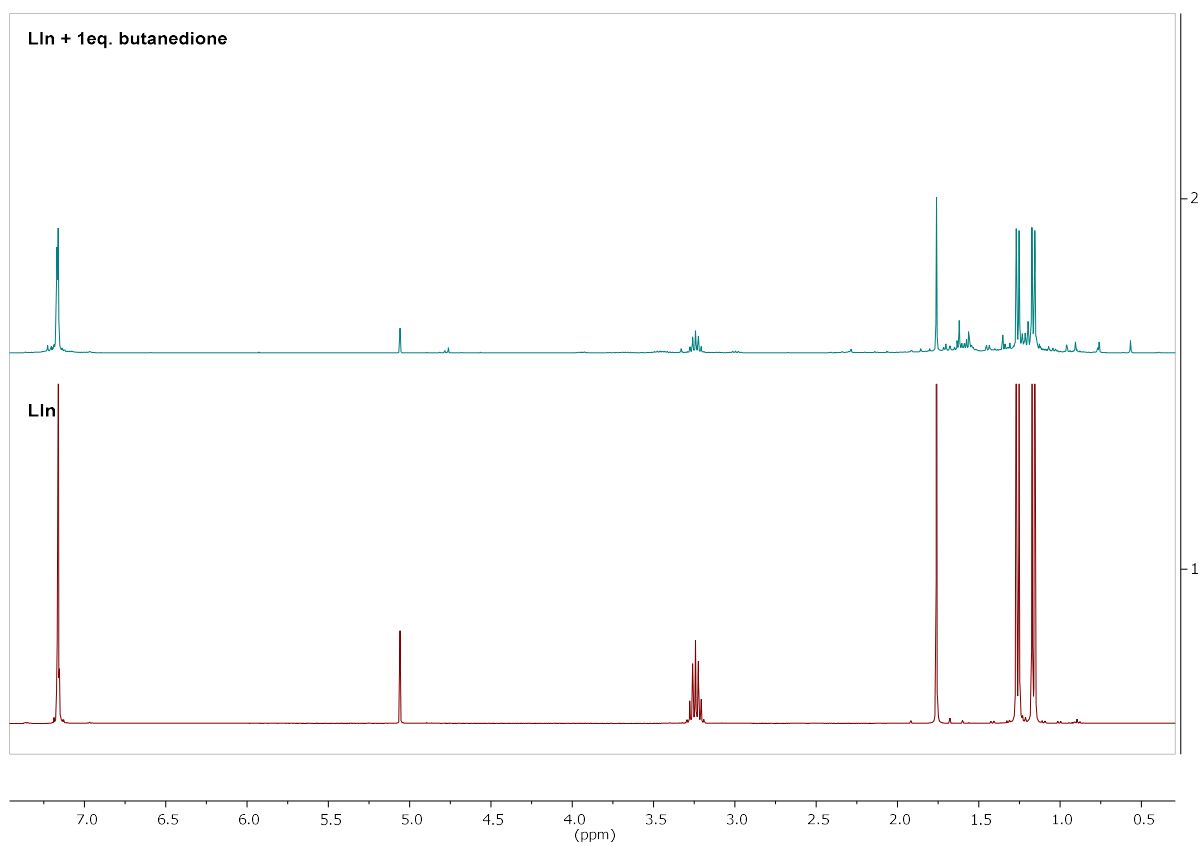

**Fig. S51.** Reaction of LIn with one equivalent of butanedione. Bottom: LIn before addition.

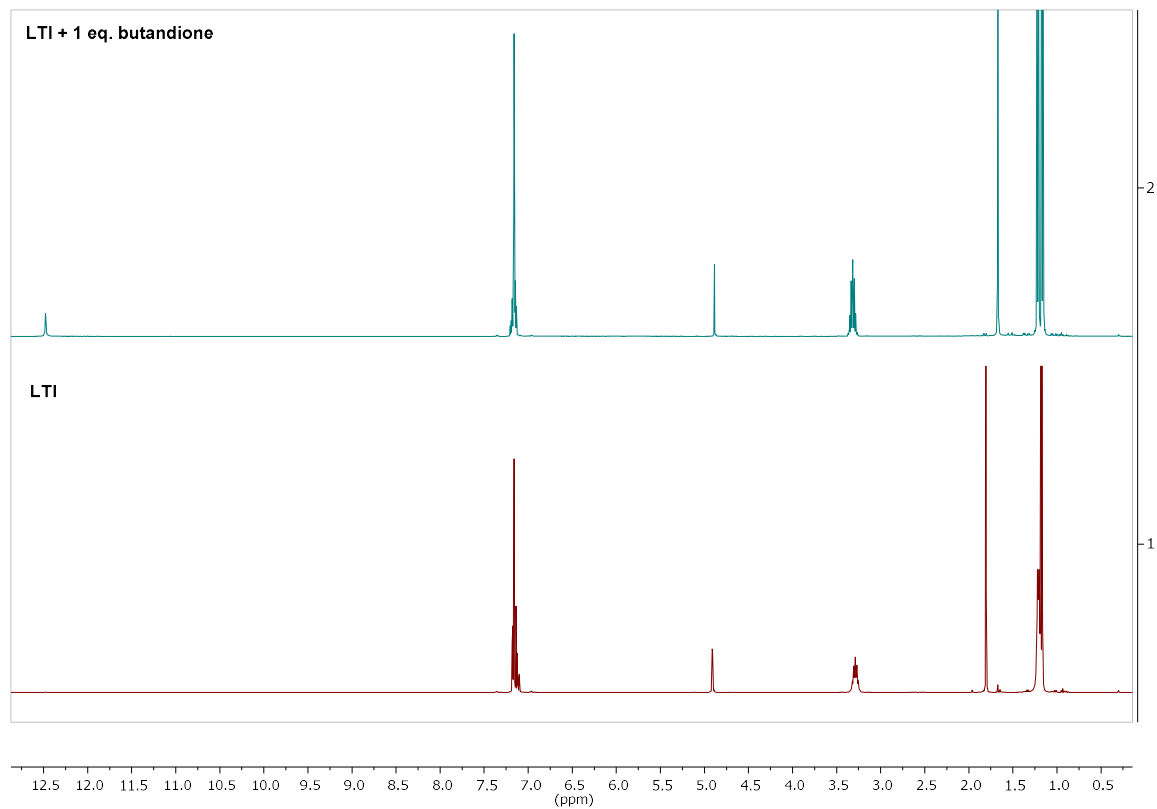

**Fig. S52.** Reaction of LTI with one equivalent of butanedione. Bottom: LTI before addition.

**Table S1a.** Crystallographic data of LGa(C<sub>4</sub>H<sub>6</sub>O<sub>2</sub>) (**1**), LGa(C<sub>8</sub>H<sub>12</sub>O<sub>4</sub>) (**2**), and LAl(C<sub>12</sub>H<sub>6</sub>O<sub>2</sub>) (**4**).

|                                                            | <b>1</b>                                                        | <b>2</b>                                                        | <b>4</b>                                                        |
|------------------------------------------------------------|-----------------------------------------------------------------|-----------------------------------------------------------------|-----------------------------------------------------------------|
| Empirical formula                                          | C <sub>33</sub> H <sub>47</sub> GaN <sub>2</sub> O <sub>2</sub> | C <sub>43</sub> H <sub>59</sub> GaN <sub>2</sub> O <sub>4</sub> | C <sub>41</sub> H <sub>47</sub> AlN <sub>2</sub> O <sub>2</sub> |
| M                                                          | 573.44                                                          | 737.64                                                          | 626.78                                                          |
| Crystal size [mm]                                          | 0.277 × 0.175 × 0.073                                           | 0.371 × 0.240 × 0.192                                           | 0.258 × 0.115 × 0.114                                           |
| T [K]                                                      | 100(2)                                                          | 100(2)                                                          | 100(2)                                                          |
| Crystal system                                             | monoclinic                                                      | orthorhombic                                                    | monoclinic                                                      |
| Space group                                                | <i>C2/c</i>                                                     | <i>Pca2<sub>1</sub></i>                                         | <i>P2<sub>1</sub>/n</i>                                         |
| <i>a</i> [Å]                                               | 20.0030(6)                                                      | 22.8793(14)                                                     | 12.9494(6)                                                      |
| <i>b</i> [Å]                                               | 19.8324(6)                                                      | 17.9690(11)                                                     | 20.0900(9)                                                      |
| <i>c</i> [Å]                                               | 17.6419(6)                                                      | 19.4578(12)                                                     | 13.6605(6)                                                      |
| $\alpha$ [°]                                               | 90                                                              | 90                                                              | 90                                                              |
| $\beta$ [°]                                                | 115.0312(14)                                                    | 90                                                              | 97.216(2)                                                       |
| $\gamma$ [°]                                               | 90                                                              | 90                                                              | 90                                                              |
| <i>V</i> [Å <sup>3</sup> ]                                 | 6341.3(4)                                                       | 7999.5(9)                                                       | 3525.7(3)                                                       |
| <i>Z</i>                                                   | 8                                                               | 8                                                               | 4                                                               |
| <i>D</i> <sub>calc</sub> [g·cm <sup>-3</sup> ]             | 1.201                                                           | 1.225                                                           | 1.181                                                           |
| $\mu$ (Mo/CuK $\alpha$ ) [mm <sup>-1</sup> ]               | 1.406                                                           | 0.730                                                           | 0.782                                                           |
| Transmissions                                              | 0.75/0.57                                                       | 0.75/0.67                                                       | 0.75/0.66                                                       |
| <i>F</i> (000)                                             | 2448                                                            | 3152                                                            | 1344                                                            |
| Index ranges                                               | -25 ≤ <i>h</i> ≤ 25                                             | -35 ≤ <i>h</i> ≤ 35                                             | -16 ≤ <i>h</i> ≤ 15                                             |
|                                                            | -25 ≤ <i>k</i> ≤ 25                                             | -27 ≤ <i>k</i> ≤ 27                                             | -25 ≤ <i>k</i> ≤ 25                                             |
|                                                            | -22 ≤ <i>l</i> ≤ 22                                             | -29 ≤ <i>l</i> ≤ 29                                             | -17 ≤ <i>l</i> ≤ 17                                             |
| $\theta_{\max}$ [°]                                        | 80.051                                                          | 33.217                                                          | 80.605                                                          |
| Refl. collected                                            | 130533                                                          | 328650                                                          | 147679                                                          |
| Independ. refl.                                            | 6890                                                            | 30570                                                           | 7713                                                            |
| <i>R</i> <sub>int</sub>                                    | 0.1000                                                          | 0.0539                                                          | 0.0662                                                          |
| Refined parameters                                         | 376                                                             | 1128                                                            | 425                                                             |
| <i>R</i> <sub>1</sub> [ <i>I</i> > 2σ( <i>I</i> )]         | 0.0297                                                          | 0.0487                                                          | 0.0358                                                          |
| <i>wR</i> <sub>2</sub> [all data]                          | 0.0766                                                          | 0.1290                                                          | 0.0963                                                          |
| <i>x</i> (Flack)                                           | —                                                               | 0.398(12)                                                       | —                                                               |
| GooF                                                       | 1.026                                                           | 1.059                                                           | 1.029                                                           |
| $\Delta\rho_{\text{final}}$ (max/min) [e·Å <sup>-3</sup> ] | 0.403/-0.569                                                    | 1.140/-0.527                                                    | 0.241/-0.291                                                    |

**Table S1b.** Crystallographic data of LGa(C<sub>12</sub>H<sub>6</sub>O<sub>2</sub>) (**5**), LIn(C<sub>12</sub>H<sub>6</sub>O<sub>2</sub>) (**6**), and LTI(C<sub>14</sub>H<sub>10</sub>O<sub>2</sub>) (**7**).

|                                                            | <b>5</b>                                                        | <b>6</b>                                                                       | <b>7</b>                                                                       |
|------------------------------------------------------------|-----------------------------------------------------------------|--------------------------------------------------------------------------------|--------------------------------------------------------------------------------|
| Empirical formula                                          | C <sub>41</sub> H <sub>47</sub> GaN <sub>2</sub> O <sub>2</sub> | C <sub>87</sub> H <sub>104</sub> In <sub>2</sub> N <sub>4</sub> O <sub>5</sub> | C <sub>94</sub> H <sub>122</sub> N <sub>4</sub> O <sub>4</sub> Tl <sub>2</sub> |
| M                                                          | 669.52                                                          | 1515.38                                                                        | 1780.69                                                                        |
| Crystal size [mm]                                          | 0.386 × 0.349 × 0.174                                           | 0.186 × 0.151 × 0.081                                                          | 0.204 × 0.072 × 0.034                                                          |
| T [K]                                                      | 100(2)                                                          | 100(2)                                                                         | 100(2)                                                                         |
| Crystal system                                             | monoclinic                                                      | monoclinic                                                                     | triclinic                                                                      |
| Space group                                                | <i>P</i> 2 <sub>1</sub> / <i>c</i>                              | <i>P</i> 2 <sub>1</sub> / <i>n</i>                                             | <i>P</i> $\bar{1}$                                                             |
| <i>a</i> [Å]                                               | 10.685(5)                                                       | 13.2394(4)                                                                     | 12.4414(12)                                                                    |
| <i>b</i> [Å]                                               | 20.803(10)                                                      | 17.9680(6)                                                                     | 14.0266(13)                                                                    |
| <i>c</i> [Å]                                               | 17.129(8)                                                       | 16.9249(5)                                                                     | 14.6235(13)                                                                    |
| $\alpha$ [°]                                               | 90                                                              | 90                                                                             | 61.987(4)                                                                      |
| $\beta$ [°]                                                | 107.264(13)                                                     | 92.4650(13)                                                                    | 74.874(5)                                                                      |
| $\gamma$ [°]                                               | 90                                                              | 90                                                                             | 85.540(5)                                                                      |
| <i>V</i> [Å <sup>3</sup> ]                                 | 3636(3)                                                         | 4022.5(2)                                                                      | 2171.9(4)                                                                      |
| <i>Z</i>                                                   | 4                                                               | 2                                                                              | 1                                                                              |
| <i>D</i> <sub>calc</sub> [g·cm <sup>-3</sup> ]             | 1.223                                                           | 1.251                                                                          | 1.361                                                                          |
| $\mu$ (Mo/CuK $\alpha$ ) [mm <sup>-1</sup> ]               | 0.793                                                           | 4.977                                                                          | 3.755                                                                          |
| Transmissions                                              | 0.75/0.66                                                       | 0.75/0.62                                                                      | 0.75/0.57                                                                      |
| <i>F</i> (000)                                             | 1416                                                            | 1584                                                                           | 908                                                                            |
| Index ranges                                               | -16 ≤ <i>h</i> ≤ 15                                             | -16 ≤ <i>h</i> ≤ 16                                                            | -16 ≤ <i>h</i> ≤ 16                                                            |
|                                                            | 0 ≤ <i>k</i> ≤ 32                                               | -22 ≤ <i>k</i> ≤ 22                                                            | -18 ≤ <i>k</i> ≤ 18                                                            |
|                                                            | 0 ≤ <i>l</i> ≤ 26                                               | -21 ≤ <i>l</i> ≤ 21                                                            | -19 ≤ <i>l</i> ≤ 19                                                            |
| $\theta_{\max}$ [°]                                        | 33.320                                                          | 80.384                                                                         | 28.399                                                                         |
| Refl. collected                                            | 182536                                                          | 147879                                                                         | 99815                                                                          |
| Independ. refl.                                            | 13884                                                           | 8784                                                                           | 10869                                                                          |
| <i>R</i> <sub>int</sub>                                    | 0.1037                                                          | 0.0604                                                                         | 0.0578                                                                         |
| Refined parameters                                         | 425                                                             | 425                                                                            | 460                                                                            |
| <i>R</i> <sub>1</sub> [ <i>I</i> > 2σ( <i>I</i> )]         | 0.0443                                                          | 0.0198                                                                         | 0.0236                                                                         |
| <i>wR</i> <sub>2</sub> [all data]                          | 0.1349                                                          | 0.0504                                                                         | 0.0574                                                                         |
| GooF                                                       | 1.048                                                           | 1.029                                                                          | 1.037                                                                          |
| $\Delta\rho_{\text{final}}$ (max/min) [e·Å <sup>-3</sup> ] | 0.884/-0.709                                                    | 0.438/-0.559                                                                   | 1.313/-1.115                                                                   |

**Table S1c.** Crystallographic data of  $\text{LaI}(\text{C}_{14}\text{H}_{10}\text{O}_2)$  (**8**),  $\text{LGa}(\text{C}_{14}\text{H}_{10}\text{O}_2)$  (**9**),  $\text{LIIn}(\text{C}_{14}\text{H}_{10}\text{O}_2) \cdot \text{MeCN}$  (**10**), and  $\text{LaI}(\text{C}_{14}\text{H}_{10}\text{O}_2)_2$  (**11**).

|                                                            | <b>8</b>                                           | <b>9</b>                                                 | <b>10</b>                                          | <b>11</b>                                                     |
|------------------------------------------------------------|----------------------------------------------------|----------------------------------------------------------|----------------------------------------------------|---------------------------------------------------------------|
| Empirical formula                                          | $\text{C}_{43}\text{H}_{51}\text{AlN}_2\text{O}_2$ | $\text{C}_{50.50}\text{H}_{58.50}\text{GaN}_2\text{O}_2$ | $\text{C}_{45}\text{H}_{54}\text{InN}_3\text{O}_2$ | $\text{C}_{142}\text{H}_{154}\text{Al}_2\text{N}_4\text{O}_8$ |
| M                                                          | 654.83                                             | 795.21                                                   | 783.73                                             | 2098.64                                                       |
| Crystal size [mm]                                          | $0.435 \times 0.210 \times 0.070$                  | $0.154 \times 0.117 \times 0.051$                        | $0.257 \times 0.229 \times 0.110$                  | $0.216 \times 0.184 \times 0.160$                             |
| T [K]                                                      | 100(2)                                             | 100(2)                                                   | 100(2)                                             | 100(2)                                                        |
| Crystal system                                             | monoclinic                                         | triclinic                                                | orthorhombic                                       | monoclinic                                                    |
| Space group                                                | $P2_1/n$                                           | $P\bar{1}$                                               | $P2_12_12_1$                                       | $P2_1/c$                                                      |
| <i>a</i> [Å]                                               | 22.055(11)                                         | 12.7707(9)                                               | 13.5750(8)                                         | 16.620(5)                                                     |
| <i>b</i> [Å]                                               | 17.741(9)                                          | 18.3465(8)                                               | 15.5145(9)                                         | 18.867(6)                                                     |
| <i>c</i> [Å]                                               | 22.328(12)                                         | 20.262(3)                                                | 19.4970(11)                                        | 19.008(6)                                                     |
| $\alpha$ [°]                                               | 90                                                 | 100.364(5)                                               | 90                                                 | 90                                                            |
| $\beta$ [°]                                                | 118.486(8)                                         | 92.789(7)                                                | 90                                                 | 99.398(5)                                                     |
| $\gamma$ [°]                                               | 90                                                 | 108.952(4)                                               | 90                                                 | 90                                                            |
| <i>V</i> [Å <sup>3</sup> ]                                 | 7679(7)                                            | 4387.4(7)                                                | 4106.2(4)                                          | 5880(3)                                                       |
| <i>Z</i>                                                   | 8                                                  | 4                                                        | 4                                                  | 2                                                             |
| <i>D</i> <sub>calc</sub> [g·cm <sup>-3</sup> ]             | 1.133                                              | 1.204                                                    | 1.268                                              | 1.185                                                         |
| $\mu(\text{Mo}/\text{CuK}\alpha)$ [mm <sup>-1</sup> ]      | 0.090                                              | 1.160                                                    | 0.614                                              | 0.086                                                         |
| Transmissions                                              | 0.75/0.64                                          | 0.75/0.65                                                | 0.75/0.71                                          | 0.75/0.63                                                     |
| <i>F</i> (000)                                             | 2816                                               | 1690                                                     | 1640                                               | 2248                                                          |
| Index ranges                                               | $-29 \leq h \leq 29$                               | $-16 \leq h \leq 16$                                     | $-22 \leq h \leq 22$                               | $-22 \leq h \leq 22$                                          |
|                                                            | $-23 \leq k \leq 23$                               | $-23 \leq k \leq 23$                                     | $-25 \leq k \leq 25$                               | $-25 \leq k \leq 25$                                          |
|                                                            | $-29 \leq l \leq 29$                               | $-25 \leq l \leq 25$                                     | $-32 \leq l \leq 32$                               | $-25 \leq l \leq 25$                                          |
| $\theta_{\text{max}}$ [°]                                  | 28.758                                             | 80.731                                                   | 36.386                                             | 28.368                                                        |
| Refl. collected                                            | 194136                                             | 260224                                                   | 119647                                             | 133457                                                        |
| Independ. refl.                                            | 19336                                              | 19089                                                    | 19997                                              | 14551                                                         |
| <i>R</i> <sub>int</sub>                                    | 0.0993                                             | 0.0488                                                   | 0.0293                                             | 0.0990                                                        |
| Refined parameters                                         | 885                                                | 1133                                                     | 471                                                | 719                                                           |
| <i>R</i> <sub>1</sub> [ <i>I</i> > 2σ( <i>I</i> )]         | 0.0477                                             | 0.0301                                                   | 0.0210                                             | 0.0689                                                        |
| <i>wR</i> <sub>2</sub> [all data]                          | 0.1258                                             | 0.0768                                                   | 0.0512                                             | 0.1546                                                        |
| <i>x</i> (Flack)                                           | —                                                  | —                                                        | -0.016(3)                                          | —                                                             |
| GooF                                                       | 1.017                                              | 1.043                                                    | 1.049                                              | 1.126                                                         |
| $\Delta\rho_{\text{final}}$ (max/min) [e·Å <sup>-3</sup> ] | 0.340/-0.364                                       | 0.315/-0.402                                             | 0.730/-0.334                                       | 0.866/-0.619                                                  |

**Table S1d.** Crystallographic data of (LAl)<sub>2</sub>(C<sub>14</sub>H<sub>10</sub>O<sub>2</sub>) (**12a,b**), and L'B(C<sub>14</sub>H<sub>10</sub>O<sub>2</sub>) (**13**).

|                                                            | <b>12a</b>                                                                     | <b>12b</b>                                                                     | <b>13</b>                                                                      |
|------------------------------------------------------------|--------------------------------------------------------------------------------|--------------------------------------------------------------------------------|--------------------------------------------------------------------------------|
| Empirical formula                                          | C <sub>84</sub> H <sub>104</sub> Al <sub>2</sub> N <sub>4</sub> O <sub>2</sub> | C <sub>81</sub> H <sub>113</sub> Al <sub>2</sub> N <sub>4</sub> O <sub>2</sub> | C <sub>31</sub> H <sub>17</sub> BF <sub>10</sub> N <sub>2</sub> O <sub>2</sub> |
| M                                                          | 1255.67                                                                        | 1228.71                                                                        | 650.27                                                                         |
| Crystal size [mm]                                          | 0.232 × 0.206 × 0.060                                                          | 0.410 × 0.350 × 0.170                                                          | 0.370 × 0.133 × 0.082                                                          |
| T [K]                                                      | 100(2)                                                                         | 100(2)                                                                         | 100(2)                                                                         |
| Crystal system                                             | triclinic                                                                      | triclinic                                                                      | triclinic                                                                      |
| Space group                                                | <i>P</i> $\bar{1}$                                                             | <i>P</i> $\bar{1}$                                                             | <i>P</i> $\bar{1}$                                                             |
| <i>a</i> [Å]                                               | 12.3771(5)                                                                     | 12.902(2)                                                                      | 9.5575(5)                                                                      |
| <i>b</i> [Å]                                               | 12.9748(5)                                                                     | 23.139(4)                                                                      | 9.9812(5)                                                                      |
| <i>c</i> [Å]                                               | 24.5551(10)                                                                    | 25.361(4)                                                                      | 15.3139(7)                                                                     |
| $\alpha$ [°]                                               | 97.796(2)                                                                      | 95.653(9)                                                                      | 98.5868(15)                                                                    |
| $\beta$ [°]                                                | 96.978(2)                                                                      | 104.445(8)                                                                     | 91.1274(14)                                                                    |
| $\gamma$ [°]                                               | 106.7538(19)                                                                   | 91.410(8)                                                                      | 106.0286(13)                                                                   |
| <i>V</i> [Å <sup>3</sup> ]                                 | 3687.0(3)                                                                      | 7287(2)                                                                        | 1385.49(12)                                                                    |
| <i>Z</i>                                                   | 2                                                                              | 4                                                                              | 2                                                                              |
| <i>D</i> <sub>calc</sub> [g·cm <sup>-3</sup> ]             | 1.131                                                                          | 1.120                                                                          | 1.559                                                                          |
| $\mu$ (Mo/CuK $\alpha$ ) [mm <sup>-1</sup> ]               | 0.725                                                                          | 0.088                                                                          | 1.266                                                                          |
| Transmissions                                              | 0.75/0.68                                                                      | 0.75/0.68                                                                      | 0.75/0.64                                                                      |
| <i>F</i> (000)                                             | 1356                                                                           | 2676                                                                           | 656                                                                            |
| Index ranges                                               | -15 ≤ <i>h</i> ≤ 15                                                            | -18 ≤ <i>h</i> ≤ 18                                                            | -11 ≤ <i>h</i> ≤ 12                                                            |
|                                                            | -16 ≤ <i>k</i> ≤ 16                                                            | -33 ≤ <i>k</i> ≤ 33                                                            | -12 ≤ <i>k</i> ≤ 12                                                            |
|                                                            | -31 ≤ <i>l</i> ≤ 31                                                            | -36 ≤ <i>l</i> ≤ 36                                                            | -19 ≤ <i>l</i> ≤ 19                                                            |
| $\theta_{\max}$ [°]                                        | 80.424                                                                         | 30.508                                                                         | 80.165                                                                         |
| Refl. collected                                            | 213903                                                                         | 250130                                                                         | 76757                                                                          |
| Independ. refl.                                            | 15992                                                                          | 44487                                                                          | 6000                                                                           |
| <i>R</i> <sub>int</sub>                                    | 0.0631                                                                         | 0.0834                                                                         | 0.0290                                                                         |
| Refined parameters                                         | 904                                                                            | 1677                                                                           | 417                                                                            |
| <i>R</i> <sub>1</sub> [ <i>I</i> > 2σ( <i>I</i> )]         | 0.0342                                                                         | 0.0531                                                                         | 0.0310                                                                         |
| <i>wR</i> <sub>2</sub> [all data]                          | 0.0889                                                                         | 0.1385                                                                         | 0.0824                                                                         |
| GooF                                                       | 1.028                                                                          | 1.006                                                                          | 1.040                                                                          |
| $\Delta\rho_{\text{final}}$ (max/min) [e·Å <sup>-3</sup> ] | 0.277/-0.280                                                                   | 0.629/-0.536                                                                   | 0.258/-0.233                                                                   |

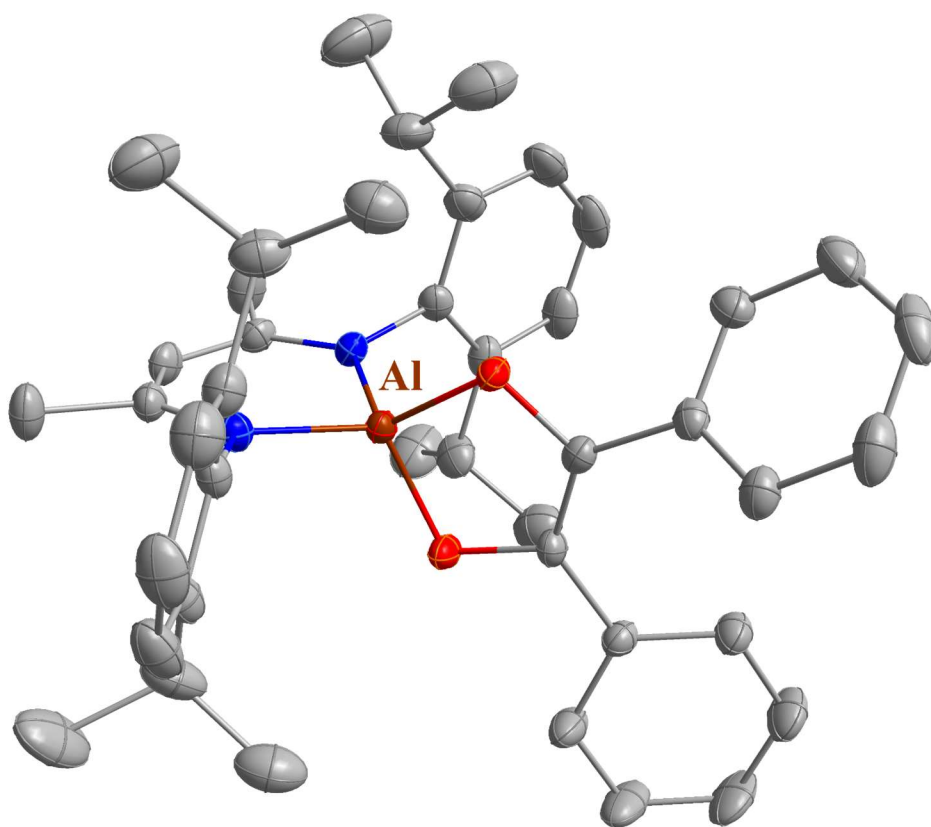

**Fig. S53.** Molecular structure of one of the two independent molecules of  $\text{LAl}(\text{C}_{14}\text{H}_{10}\text{O}_2)$  (**8**) in its crystals. Displacement ellipsoids are drawn at the 50% probability level and H atoms are omitted.

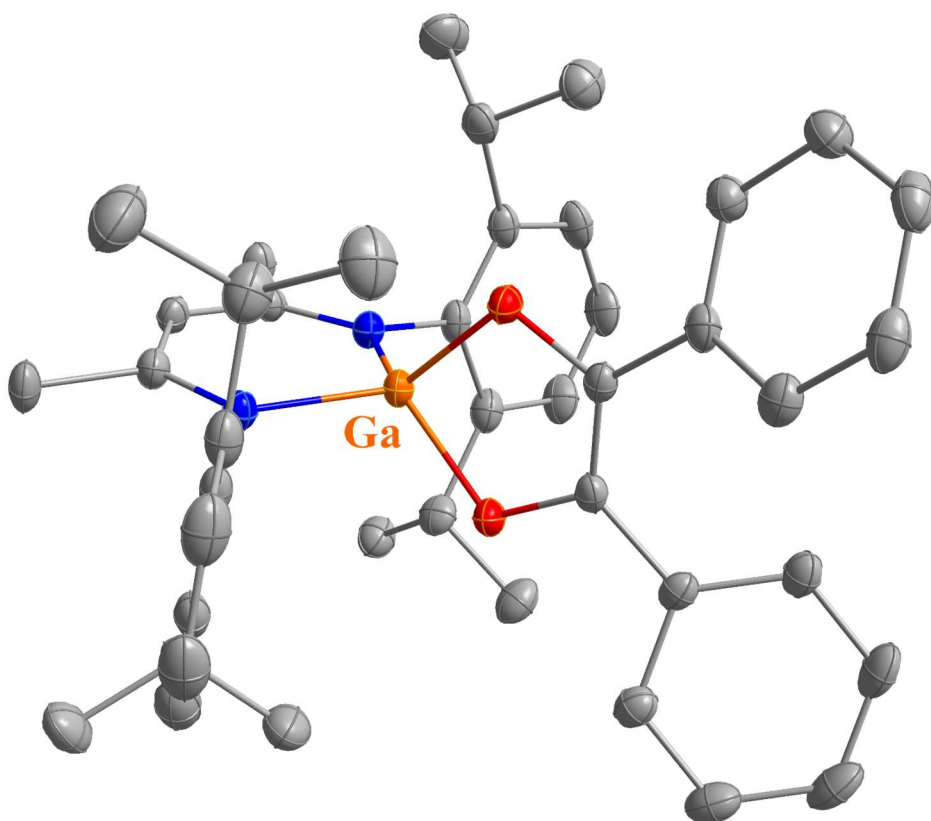

**Fig. S54.** Molecular structure of one of the two independent molecules of  $\text{LGa}(\text{C}_{14}\text{H}_{10}\text{O}_2)$  (**9**) in its crystals. Displacement ellipsoids are drawn at the 50% probability level. Only the major component of disorders is shown, and H atoms are omitted.

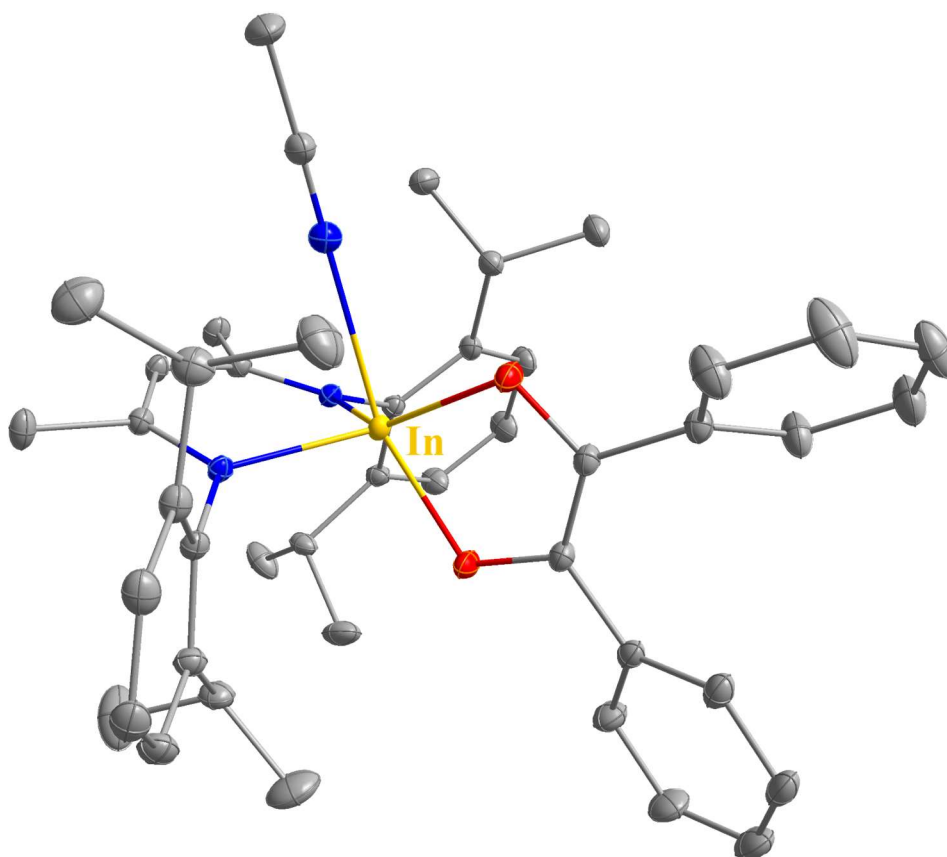

**Fig. S55.** Molecular structure of  $\text{LIn}(\text{C}_{14}\text{H}_{10}\text{O}_2) \cdot \text{MeCN}$  (**10**) in its crystals. Displacement ellipsoids are drawn at the 50% probability level.

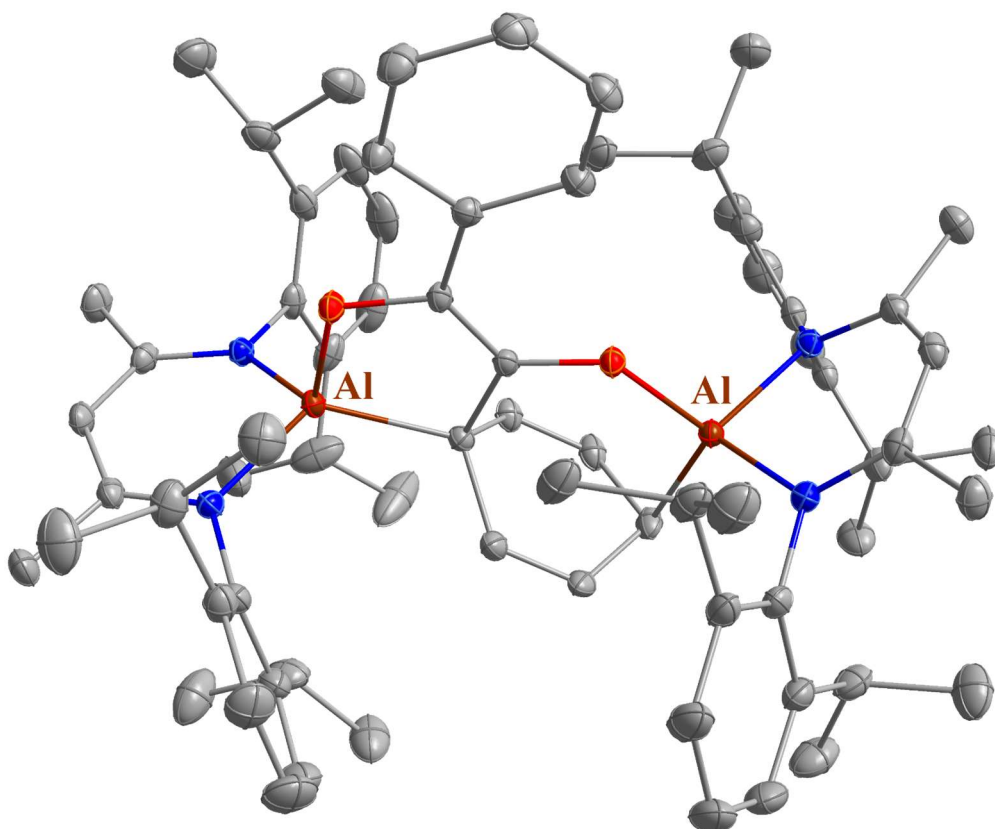

**Fig. S56.** Molecular structure of one of the two independent molecules of  $(\text{LAl})_2(\text{C}_{14}\text{H}_{10}\text{O}_2)$  (**12b**) in its crystals. Displacement ellipsoids are drawn at the 50% probability level, and H atoms are omitted.

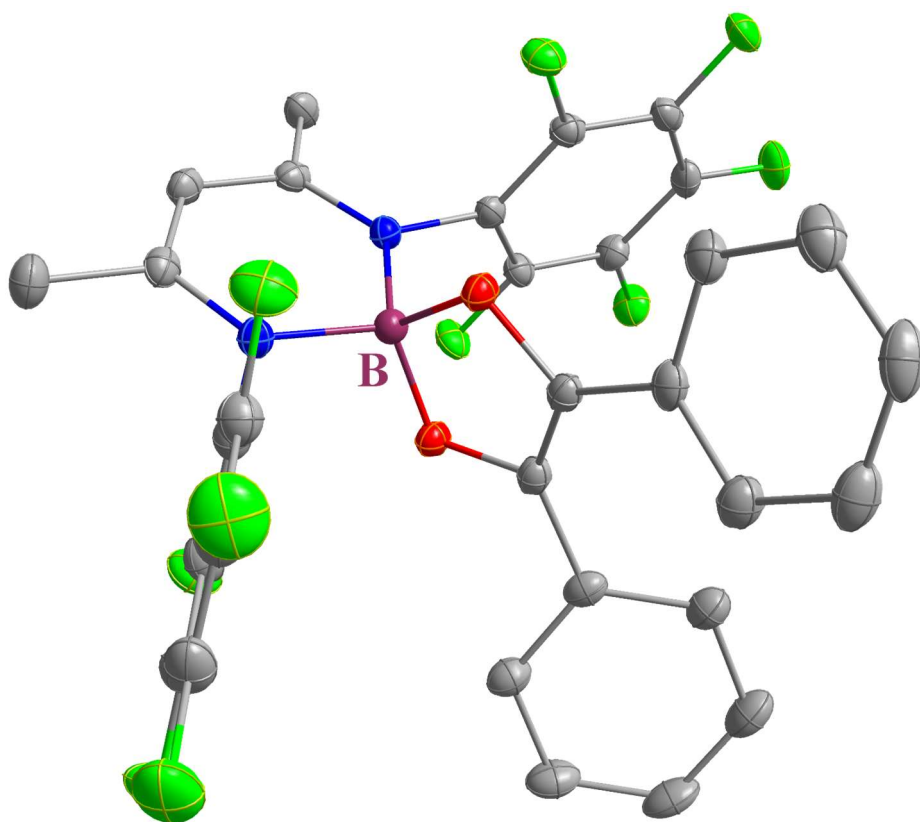

**Fig. S57.** Molecular structure of one of the two independent molecules of  $L'B(C_{14}H_{10}O_2)$  (**13**) in its crystals. Displacement ellipsoids are drawn at the 50% probability level, and H atoms are omitted.
